# Supplementary material for: Differences in Metabolomic Profiles Between Black and White Women and Risk of Coronary Heart Disease: an Observational Study of Women From Four US Cohorts
Source: PubMed Central journal article supplement — Circ Res. 2022 Sep 2;131(7):601–15. doi: 10.1161/CIRCRESAHA.121.320134 (PMC9473718; doi:10.1161/circresaha.121.320134), 2022-09-02

## **SUPPLEMENTAL MATERIAL**

### **Differences in Metabolomic Profiles between Black and White Women and Risk of Coronary Heart Disease: An Observational Study of Women from 4 US Cohorts**

Jie Hu, Jie Yao, Shuliang Deng, Raji Balasubramanian, Monik C. Jiménez, Jun Li, Xiuqing Guo, Daniel E. Cruz, Yan Gao, Tianyi Huang, Oana A. Zeleznik, Debby Ngo, Simin Liu, Milagros C. Rosal, Rami Nassir, Nina P. Paynter, Christine M. Albert, Russell P. Tracy, Peter Durda, Yongmei Liu, Kent D. Taylor, W. Craig Johnson, Qi Sun, Eric B. Rimm, A. Heather Eliassen, Stephen S. Rich, Jerome I. Rotter, Robert E. Gerszten, Clary B. Clish, Kathryn M. Rexrode

#### **Corresponding author:**

Kathryn M. Rexrode, MD, MPH

75 Francis Street, OBC3, Boston, MA 02115

Phone: +1 (617) 525-7588

Fax: +1 (617) 525-7746

E-mail: [krexrode@bwh.harvard.edu](mailto:krexrode@bwh.harvard.edu)

## CONTENTS

### Supplemental Methods

#### Supplemental Tables

**Table S1.** Baseline characteristics of women from the MESA.

**Table S2.** Baseline characteristics of women from the JHS and NHS.

**Table S3.** Regression coefficients of metabolome-wide association analyses in WHI-OS and WHI-HT.

**Table S4.** Regression coefficients of metabolome-wide association analyses in WHI and MESA.

**Table S5.** Magnitude of difference in metabolites that were more than 0.5-SD between Black and White women, and their associations with risk of coronary heart disease in the WHI, JHS, and NHS.

**Table S6.** Components and their coefficients (estimated using elastic net) in the Racial Difference Metabolomic Pattern (RDMP).

#### Supplemental Figures

**Figure S1.** Flow chart for the statistical analysis approaches of this study.

**Figure S2.** Distributions of Racial Difference Metabolomic Pattern (RDMP) z-score in each RDMP quartile in the WHI by race.

**Figure S3.** Concordance of regression coefficients associated with self-reported race (Black vs White) between WHI-OS, WHI-HT, and MESA.

**Figure S4.** Associations between metabolites with >1 SD difference by race and with CHD risk in the WHI, stratified by self-reported race.

**Figure S5.** Receiver operating characteristic (ROC) performance of the Racial Difference Metabolomic Pattern (RDMP) and the restricted RDMP (rRDMP) and self-reported race in WHI and MESA.

**Figure S6.** Distributions of restricted Racial Difference Metabolomic Pattern (rRDMP) that were calculated using the overlapping metabolites with MESA, JHS, or NHS in the WHI-HT.

## Supplemental Methods (Study population)

### Women's Health Initiative

The Women's Health Initiative (WHI) is a long-term nation-wide study funded by the National Heart, Lung, and Blood Institute (NHLBI). The WHI study focuses on strategies for preventing heart disease, breast and colorectal cancer, and osteoporosis in postmenopausal women. The original WHI study, initiated in 1994, had three parts – a clinical trial (i.e., Hormone Therapy trial; WHI-HT), an observational study (i.e., WHI-OS), and a community prevention study – and completed data collection in 2005. The WHI has continued to follow up study participants since 2005 as Extension Studies, which are annual collections of health updates and outcomes in active participants. The second Extension Study enrolled 93,500 women in 2010 and follow-up of these women continues annually.

In the WHI, participants were asked “How would you describe your racial or ethnic group? If you are of mixed blood, which group do you identify with most?” The participants could only select one of the following options: 1) American Indian or Alaskan Native; 2) Asian or Pacific Islander (ancestry is Chinese, Indo-Chinese, Korean, Japanese, Pacific Islander, Vietnamese); 3) Black or African-American (not of Hispanic origin); 4) Hispanic/Latino (ancestry is Mexican, Cuban, Puerto Rican, Central American, or South American); 5) White (not of Hispanic origin); 6) Other (Specify).

Women from the present study were drawn from the WHI in a prior nested case-control study of coronary heart disease (CHD).<sup>15</sup> We define “Black” as self-reported “Black or African-American (not of Hispanic origin)” and “White” as self-reported “White (not of Hispanic origin).”

***WHI-OS (discovery/training)***: The full WHI-OS enrolled 93,676 postmenopausal women ineligible or unwilling to participate in the related hormone trials, enrolled between 1994 and 1998 in the US. All participants provided written informed consent. In our published study, 472 women who developed CHD after the baseline examination (cases) were selected and were matched to 472 women who did not develop CHD on 5-year age, race/ethnicity, hysterectomy status, and 2-year enrollment groups.<sup>15</sup> In the present study, we included 834 women (417 incident CHD cases with a median time to event of 6.4 years and 417 matched controls; Black/White: 138/696) who had baseline metabolomics data and had no missing covariate data.

**WHI-HT (validation/testing):** In the WHI-HT, one of the trials randomly assigned 16,608 postmenopausal women to estrogen plus progesterone or placebo, whereas the other 10,739 women with prior hysterectomy were randomly assigned to estrogen or placebo. All women provided written informed consent. Using the same criteria mentioned above, the present study included 1,294 women (647 incident CHD cases with a median time to event of 4.0 years and 647 matched controls) from the WHI-HT, including 156 Black and 1,138 White women.

**Blood samples:** Plasma samples were collected using EDTA tubes in the WHI and processed immediately. All collected specimens were stored in a  $-70^{\circ}\text{C}$  freezer within 2 hours of collection or stored at  $-20^{\circ}\text{C}$  for up to 2 days and shipped on dry ice and stored at  $-70^{\circ}\text{C}$  until processing. The majority of the WHI samples had been thawed once before our study, with 7 samples (6 cases and 1 control) having been thawed twice.

**Metabolomics profiling:** Plasma metabolomics profiling was performed in samples collected at the study baseline for both WHI-OS and WHI-HT. The detailed information on metabolomics profiling has been published.<sup>15</sup> Briefly, Metabolomic measurements were made using 4 complimentary liquid chromatography–tandem mass spectroscopy (LC-MS) methods resulting in over 6,000 metabolites, including 509 known metabolites. For each method, pooled plasma reference samples were included every 20 samples, and results were standardized using the ratio of the value of the sample to the value of the nearest pooled reference multiplied by the median of all reference values for the metabolite. The 4 LC-MS methods are:

- 1) **HILIC-pos:** The HILIC analyses of water-soluble metabolites in the positive ionization mode were conducted using an LC-MS system composed of a Shimadzu Nexera X2 U-HPLC (Shimadzu Corp) coupled to a Q Exactive hybrid quadrupole orbitrap mass spectrometer (Thermo Fisher Scientific).
- 2) **HILIC-neg:** HILIC analyses of water-soluble metabolites in the negative ionization mode were conducted by using an LC-MS system composed of an AQUITY UPLC system (Waters and a 5500 QTRAP mass spectrometer [SCIEX])
- 3) **C8-pos:** Positive ion mode analyses of polar and nonpolar plasma lipids were conducted by using an LC-MS system composed of a Shimadzu Nexera X2 U-HPLC (Shimadzu Corp) coupled to a Exactive Plus orbitrap mass spectrometer (Thermo Fisher Scientific).
- 4) **C18-neg:** Negative ion mode analyses of free fatty acids and bile acids were conducted using an LC-MS system composed of a Shimadzu Nexera X2 U-HPLC (Shimadzu Corp)

coupled to a Q Exactive hybrid quadrupole orbitrap mass spectrometer (Thermo Fisher Scientific).

### **Multi-Ethnic Study of Atherosclerosis**

The Multi-Ethnic Study of Atherosclerosis (MESA) study is a study of the characteristics of subclinical cardiovascular disease (disease detected non-invasively before it has produced clinical signs and symptoms) and the risk factors that predict progression to clinically overt cardiovascular disease or progression of the subclinical disease. The MESA began in 2000 with 6,814 men and women aged 45 to 84 years recruited at 6 clinical centers across the US. The study participants were self-identified belonging to 4 racial/ethnic groups: Black, Hispanic, Asian, or White.

In the present study, we included 333 women (114 Black and 219 White women) from the MESA as an external replication and testing set. These women were drawn from a multi-omics pilot study in which participants were randomly selected from the full MESA study. Metabolomics profile was measured using the same methods as the WHI in plasma samples collected at the Exam 1 (between 2000 and 2002).

### **Jackson Heart Study**

The Jackson Heart Study (JHS) is a single-site, prospective, population-based cohort study of cardiovascular disease and risk factors in Black/African-American individuals aged 21-84 years from 3 counties surrounding Jackson, Mississippi, US. Participants were recruited and examined according at baseline (between 2000 and 2004) and in subsequent follow-up visits. Clinic visits included physical examination, anthropometry, surveys of medical history and of cardiovascular risk factors, and collection of blood and urine for analysis. Ongoing surveillance methods include annual follow-up telephone interviews and medical records review for adjudication of selected events such as coronary heart disease (CHD). The JHS was approved by the institutional review boards of Jackson State University, Tougaloo College, and the University of Mississippi Medical Center in Jackson, Mississippi. Written informed consent was obtained from all study participants. The research protocol for the current replication analysis on metabolomics of incident CHD risk was approved by the institutional review board at Beth Israel Deaconess Medical Center in Boston, Massachusetts.

Women included in the present study were drawn from a recently published study on metabolomics of incident CHD, which included 2,346 participants with plasma metabolomic profiling data.<sup>16</sup> The replication analysis of the present study included 1,465 women from the JHS. During a median of 11.7 years, 107 incident CHD cases were documented.

**Metabolomics profiling:** Details of metabolomics profiling methods has been previously published.<sup>16</sup> To measure water-soluble metabolites in the positive ionization mode, hydrophilic interaction liquid chromatography (HILIC, Waters; Mildford, MA) was performed using a Shimadzu Nexera X2 U Exactive massHPLC (Shimadzu Corp.; Marlborough, MA) coupled to a Q spectrometer (Thermo Fisher Scientific; Waltham, MA). To measure organic acids and other intermediary metabolites in negative ionization or amide mode, chromatography was performed on an Agilent 1290 infinity LC system equipped with a Waters XBridge Amide column, coupled to an Agilent 6490 triple quadrupole mass spectrometer. Metabolite transitions were assed using a dynamic multiple reaction monitoring system. LC-MS were analyzed with Agilent Masshunter QQQ Quantitative analysis software.

LC-MS peaks were manually reviewed in a blinded manner to assess peak quality. As part of the QC protocol, isotopically labeled standards were interspersed throughout the run every 10 injections in order to monitor and correct for temporal drift in mass spectrometry performance. The nearest neighbor flanking pair of pooled plasma was used to normalize experimental samples in a metabolite-by-metabolite manner by dividing the experimental sample's peak area by the average of the two nearest neighbor flanking pairs. Metabolites that were defined as having a biological to analytical CV ratio  $<1$  were removed from analysis. Metabolites that were determined to have poor peak quality during blinded peak review were also removed from subsequent processing. Finally, metabolites that failed QC as determined by group review were removed from subsequent processing. The median CV of the final metabolites analyzed was 4.2%, indicating that these metabolites were well-measured overall.

### **Nurses' Health Study**

The Nurses' Health Study (NHS) is a prospective cohort study initiated in 1976 and enrolled 121,700 female registered nurses, aged 30 between 55 years, from 11 states in the US. The study participants completed a baseline questionnaire collecting information on lifestyle, medical history, and health-related questions, and with similar biennial questionnaires through follow-up.

Blood samples were collected in a sub-set of participants during 1989-1990 (n=32,826), with a questionnaire regarding blood draw information and medication use status. A high follow-up rate (>95%) was maintained among participants who provided blood samples. The study protocol was approved by the Institutional Review Boards of Mass General Brigham/Brigham and Women's Hospital, with participants' consent implied by the return of the questionnaires.

As a replication cohort, we included women from the NHS who provided blood samples and had metabolomic profiling data available.<sup>24</sup> Participants included in the current replication analyses were pooled from 10 prior metabolomics sub-studies – nested case-control studies (NCC) originally designed for different outcomes, including amyotrophic lateral sclerosis, breast cancer, colon cancer, glaucoma, inflammatory bowel disease, ovarian cancer, Parkinson's disease, rheumatoid arthritis, stroke, and type 2 diabetes. Women within each original NCC study were free of originally designed endpoints at the time of blood collection. Metabolomics profiling was performed using the same methods as the WHI.<sup>24</sup> We used a standard framework to combine metabolomic profiles from each sub-study. At the sample level, we first removed QC and drift pool samples, and then removed duplicate samples across sub-studies (if identified, only include the most recently measured one). At the metabolite level, we excluded metabolites that failed the blood processing delay pilot (i.e., metabolites were not robust with respect to the way NHS samples were collected, shipped on ice overnight, and should be excluded from all metabolomic studies<sup>25</sup>). We also excluded duplicate metabolites 1) within a given sub-study by keeping the best performing one (i.e., lowest CV and highest ICC) and 2) across different LC-MS methods by including ones that were measured using the preferred method according to the Broad metabolomics team. When combining the metabolomic profiling data from different sub-studies, datasets were grouped and merged by method (i.e., metabolites measured using the same LC-MS method were merged across sub-studies).

In the current replication analysis, we only included White women from the NHS who had prior measured metabolomics data and excluded women who had CVD or cancer at the time of blood collection or missing blood lipids measurements (i.e., total and high-density lipoprotein cholesterol). After QC steps, 2,506 White women were included in the replication analyses, and 136 incident CHD cases were documented during a median follow-up of 24.3 years.

## Supplementary Tables

**Table S1. Baseline characteristics of women from the MESA.**

| <b>Mean ± SD or No. (%)</b>        | <b>Black women<br/>(N = 114)</b> | <b>White women<br/>(N = 219)</b> | <b>P</b> |
|------------------------------------|----------------------------------|----------------------------------|----------|
| Age, years                         | 60.7 ± 9.6                       | 61.6 ± 10.1                      | 0.42     |
| Body mass index, kg/m <sup>2</sup> | 31.9 ± 6.1                       | 27.7 ± 5.6                       | <0.0001  |
| Alcohol intake, Drinks/week        | 1.4 ± 2.5                        | 3.0 ± 5.0                        | 0.006    |
| Physical activity, MET-hour/week   | 108.5 ± 45.6                     | 94.3 ± 29.8                      | 0.0007   |
| Total cholesterol, mg/dl           | 195.4 ± 38.1                     | 204.1 ± 37.6                     | 0.05     |
| HDL-cholesterol, mg/dl             | 57.5 ± 15.3                      | 59.0 ± 14.7                      | 0.39     |
| LDL-cholesterol, mg/dl             | 119.8 ± 34.2                     | 118.9 ± 31.2                     | 0.81     |
| Baseline diabetes                  | 11 (9.7%)                        | 9 (4.1%)                         | 0.044    |
| Baseline hypertension              | 68 (59.7%)                       | 74 (33.8%)                       | <0.0001  |
| Baseline depression (CES-D Scale)  | 9.4 ± 7.9                        | 7.3 ± 6.5                        | 0.008    |
| Hormone therapy status             |                                  |                                  |          |
| Non-users                          | 54 (47.4%)                       | 82 (37.4%)                       | 0.02     |
| Past users                         | 18 (15.8%)                       | 38 (17.4%)                       | 0.95     |
| Current users                      | 26 (22.8%)                       | 79 (36.1%)                       | 0.09     |
| Unknown                            | 16 (14.0%)                       | 20 (9.1%)                        | 0.09     |
| Medication use                     |                                  |                                  |          |
| Anti-depression                    | 1 (0.9%)                         | 5 (2.3%)                         | 0.36     |
| Lipid-lowering                     | 17 (15.0%)                       | 37 (16.9%)                       | 0.67     |
| Aspirin                            | 35 (30.7%)                       | 75 (34.3%)                       | 0.51     |
| Antihypertensive meds              | 61 (53.9%)                       | 65 (29.7%)                       | <0.0001  |
| Antihyperglycemic meds             | 10 (8.8%)                        | 8 (3.7%)                         | 0.05     |
| Smoking status                     |                                  |                                  |          |
| Never smokers                      | 61 (53.5%)                       | 99 (45.2%)                       | 0.15     |
| Past smokers                       | 33 (29.0%)                       | 92 (42.0%)                       | 0.02     |
| Current smokers                    | 19 (16.7%)                       | 28 (12.8%)                       | 0.33     |
| Unknown                            |                                  |                                  |          |
| Education                          |                                  |                                  | 0.03     |
| Below high school                  | 11 (9.7%)                        | 10 (4.6%)                        |          |
| High school diploma or GED         | 27 (23.7%)                       | 50 (22.8%)                       |          |
| Vocational or training school      | 12 (10.5%)                       | 11 (5.0%)                        |          |
| Some college or Associate Degree   | 35 (30.7%)                       | 53 (24.2%)                       |          |
| Baccalaureate Degree and above     | 28 (24.6%)                       | 95 (43.4%)                       |          |
| Income                             |                                  |                                  | 0.0002   |
| Less than \$19,999                 | 24 (21.1%)                       | 23 (10.5%)                       |          |
| \$20,000 to \$34,999               | 37 (32.5%)                       | 48 (21.9%)                       |          |
| \$35,000 to \$49,999               | 22 (19.3%)                       | 43 (19.6%)                       |          |
| \$50,000 to \$74,999               | 15 (13.2%)                       | 50 (22.8%)                       |          |
| \$75,000 or more                   | 12 (10.5%)                       | 53 (24.2%)                       |          |

Abbreviations: SD, standard deviation; CHD, coronary heart disease; MET, metabolic equivalent; HDL, high-density lipoprotein; GED, General Educational Development.



**Table S2. Baseline characteristics of women from the JHS and NHS.**

|                                       | <b>JHS</b>         | <b>NHS</b>         |
|---------------------------------------|--------------------|--------------------|
| <b>Mean ± SD or No. (%)</b>           | <b>(N = 1,465)</b> | <b>(N = 2,506)</b> |
| Incident CHD                          | 107 (7.3%)         | 136 (5.4%)         |
| Age, years                            | 56 ± 13            | 59.31 ± 6.52       |
| Body mass index, kg/m <sup>2</sup>    | 33 ± 8             | 25.92 ± 4.90       |
| Total cholesterol, mg/dl              | 202 ± 41           | 215.89 ± 38.39     |
| HDL-cholesterol, mg/dl                | 55 ± 15            | 56.77 ± 15.40      |
| Alternative Healthy Eating Index-2010 | -                  | 53.67 ± 10.59      |
| Systolic blood pressure, mmHg         | 126 ± 18           | 129.25 ± 14.52     |
| Baseline diabetes                     | 311 (21.2%)        | 204 (8.1%)         |
| Baseline hypertension                 | 915 (62.5%)        | 918 (36.6%)        |
| Menopausal status                     |                    |                    |
| Pre-menopause                         | 158 (10.8%)        | 326 (13.0%)        |
| Post-menopause                        | 987 (67.4%)        | 1999 (79.8%)       |
| Unknown                               | 320 (21.8%)        | 181 (7.2%)         |
| HT use status                         |                    |                    |
| Never/past users                      | 1107 (75.6%)       | 1536 (61.3%)       |
| Current users                         | 358 (24.4%)        | 970 (38.7%)        |
| Smoking status                        |                    |                    |
| Never smokers                         | 1075 (73.4%)       | 1126 (44.9%)       |
| Past smokers                          | 247 (16.9%)        | 1025 (40.9%)       |
| Current smokers                       | 130 (8.9%)         | 355 (14.2%)        |
| Unknown                               | 13 (0.9%)          | -                  |
| Medication use                        |                    |                    |
| Aspirin                               | 324 (22.1%)        | 1223 (48.8%)       |
| Lipid-lowering medications            | 147 (10.0%)        | 91 (3.6%)          |
| Antihypertensive medications          | 783 (53.4%)        | 694 (27.7%)        |
| Antihyperglycemic medications         | 209 (14.3%)        | 93 (3.7%)          |
| Education                             |                    |                    |
| Below high school                     | 255 (17.4%)        | -                  |
| High school diploma or GED            | 294 (20.1%)        | -                  |
| Vocational or training school         | 74 (5.1%)          | -                  |
| Some college or Associate Degree      | 345 (23.5%)        | -                  |
| Baccalaureate Degree and above        | 491 (33.5%)        | -                  |
| Unknown                               | 6 (0.4%)           | -                  |
| Family income                         |                    |                    |
| Poor                                  | 199 (13.6%)        | -                  |
| Lower-middle                          | 323 (22.0%)        | -                  |
| Upper-middle                          | 380 (25.9%)        | -                  |
| Affluent                              | 347 (23.7%)        | -                  |
| Unknown                               | 216 (14.7%)        | -                  |

Abbreviations: SD, standard deviation; CHD, coronary heart disease; HDL, high-density lipoprotein; GED, General Educational Development.

**Table S3. Regression coefficients of metabolome-wide association analyses in WHI-OS and WHI-HT.**

| Metabolite name | Method | Category                         | HMDB ID    | WHI-OS  |         |         |         |         |         |         |         |         |         |         |         |         |         | WHI-HT  |         |         |         |         |         |         |         |         |         |         |         |         |         |
|-----------------|--------|----------------------------------|------------|---------|---------|---------|---------|---------|---------|---------|---------|---------|---------|---------|---------|---------|---------|---------|---------|---------|---------|---------|---------|---------|---------|---------|---------|---------|---------|---------|---------|
|                 |        |                                  |            | Model 1 |         | Model 2 |         | Model 3 |         | Model 4 |         | Model 5 |         | Model 6 |         | Model 7 |         | Model 1 |         | Model 2 |         | Model 3 |         | Model 4 |         | Model 5 |         | Model 6 |         | Model 7 |         |
|                 |        |                                  |            | Beta    | FDR     |
| C30:0 DAG       | C8-pos | Glycerolipids - Diacylglycerols  | HMDB07011* | -0.47   | 8.7E-07 | -0.32   | 2.9E-04 | -0.47   | 7.8E-07 | -0.49   | 8.3E-07 | -0.47   | 2.4E-06 | -0.48   | 1.1E-06 | -0.25   | 1.6E-01 | -0.59   | 4.8E-11 | -0.32   | 8.6E-05 | -0.60   | 4.1E-11 | -0.58   | 1.0E-09 | -0.58   | 1.0E-09 | -0.60   | 1.0E-10 | -0.60   | n/a     |
| C32:0 DAG       | C8-pos | Glycerolipids - Diacylglycerols  | HMDB07098* | -0.60   | 3.5E-09 | -0.40   | 1.5E-05 | -0.61   | 2.6E-09 | -0.61   | 1.3E-08 | -0.59   | 2.4E-08 | -0.63   | 1.9E-09 | -0.39   | 4.4E-02 | -0.55   | 7.8E-12 | -0.31   | 4.1E-05 | -0.60   | 3.7E-12 | -0.58   | 2.5E-10 | -0.60   | 3.7E-12 | -0.58   | 1.7E-10 | -0.61   | 6.0E-12 |
| C32:1 DAG       | C8-pos | Glycerolipids - Diacylglycerols  | HMDB07099* | -0.87   | 7.8E-18 | -0.65   | 1.5E-13 | -0.88   | 4.6E-18 | -0.89   | 3.3E-17 | -0.87   | 9.3E-17 | -0.90   | 6.1E-18 | -0.71   | 6.0E-05 | -0.86   | 1.0E-22 | -0.55   | 5.5E-14 | -0.87   | 8.3E-23 | -0.85   | 4.7E-20 | -0.85   | 3.7E-20 | -0.88   | 1.6E-22 | -0.87   | 1.8E-23 |
| C32:2 DAG       | C8-pos | Glycerolipids - Diacylglycerols  | HMDB07128* | -0.76   | 3.4E-15 | -0.54   | 2.8E-11 | -0.76   | 2.8E-15 | -0.78   | 4.0E-15 | -0.77   | 1.9E-14 | -0.78   | 2.2E-15 | -0.59   | 2.7E-04 | -0.89   | 5.8E-22 | -0.56   | 4.6E-13 | -0.89   | 9.4E-22 | -0.87   | 2.3E-19 | -0.87   | 2.2E-19 | -0.90   | 1.4E-21 | -0.90   | 1.7E-22 |
| C34:0 DAG       | C8-pos | Glycerolipids - Diacylglycerols  | HMDB07100* | -0.59   | 1.4E-07 | -0.43   | 5.3E-05 | -0.60   | 1.2E-07 | -0.62   | 1.2E-07 | -0.61   | 1.7E-07 | -0.60   | 1.8E-07 | -0.36   | 9.9E-02 | -0.43   | 1.6E-07 | -0.24   | 2.2E-03 | -0.44   | 6.7E-08 | -0.42   | 9.0E-07 | -0.42   | 7.6E-07 | -0.45   | 7.2E-08 | -0.43   | n/a     |
| C34:1 DAG       | C8-pos | Glycerolipids - Diacylglycerols  | HMDB07102* | -0.65   | 3.2E-11 | -0.42   | 5.6E-07 | -0.66   | 2.2E-11 | -0.67   | 7.1E-11 | -0.66   | 1.3E-10 | -0.69   | 8.3E-12 | -0.50   | 4.8E-03 | -0.66   | 3.6E-14 | -0.33   | 2.8E-06 | -0.68   | 1.3E-14 | -0.67   | 3.2E-13 | -0.66   | 4.5E-13 | -0.69   | 1.3E-14 | -0.67   | 6.5E-15 |
| C34:2 DAG       | C8-pos | Glycerolipids - Diacylglycerols  | HMDB07103* | -0.83   | 1.0E-16 | -0.58   | 2.4E-12 | -0.83   | 8.8E-17 | -0.84   | 6.9E-16 | -0.83   | 1.6E-15 | -0.86   | 6.2E-17 | -0.66   | 9.7E-05 | -0.86   | 1.3E-22 | -0.50   | 1.3E-13 | -0.85   | 2.8E-22 | -0.87   | 8.1E-21 | -0.86   | 9.0E-21 | -0.89   | 5.0E-23 | -0.87   | 2.1E-23 |
| C34:3 DAG       | C8-pos | Glycerolipids - Diacylglycerols  | HMDB07132* | -0.95   | 3.9E-21 | -0.71   | 1.9E-17 | -0.95   | 5.7E-21 | -0.96   | 3.6E-20 | -0.95   | 9.5E-20 | -0.97   | 7.8E-21 | -0.76   | 7.4E-06 | -0.97   | 2.2E-27 | -0.62   | 2.5E-18 | -0.96   | 2.8E-26 | -0.97   | 1.5E-24 | -0.97   | 1.2E-24 | -0.99   | 3.7E-27 | -0.98   | 7.2E-28 |
| C36:1 DAG       | C8-pos | Glycerolipids - Diacylglycerols  | HMDB07216* | -0.50   | 1.9E-07 | -0.28   | 8.8E-04 | -0.51   | 1.3E-07 | -0.53   | 1.4E-07 | -0.52   | 1.9E-07 | -0.55   | 2.8E-08 | -0.36   | 4.9E-02 | -0.56   | 7.4E-10 | -0.24   | 1.6E-03 | -0.58   | 1.5E-10 | -0.58   | 1.3E-09 | -0.56   | 4.4E-09 | -0.59   | 2.0E-10 | -0.57   | 1.6E-10 |
| C36:2 DAG       | C8-pos | Glycerolipids - Diacylglycerols  | HMDB07218* | -0.85   | 2.8E-17 | -0.58   | 2.5E-12 | -0.85   | 1.5E-17 | -0.88   | 5.5E-17 | -0.87   | 9.3E-17 | -0.90   | 1.8E-18 | -0.73   | 1.7E-05 | -0.82   | 6.3E-20 | -0.49   | 2.0E-11 | -0.84   | 1.9E-20 | -0.87   | 1.3E-19 | -0.84   | 7.3E-19 | -0.86   | 1.4E-20 | -0.83   | 1.1E-20 |
| C36:3 DAG       | C8-pos | Glycerolipids - Diacylglycerols  | HMDB07219* | -0.79   | 8.9E-15 | -0.52   | 1.1E-09 | -0.79   | 6.6E-15 | -0.81   | 2.5E-14 | -0.79   | 8.0E-14 | -0.83   | 1.7E-15 | -0.63   | 1.1E-04 | -0.78   | 4.7E-18 | -0.45   | 1.2E-09 | -0.78   | 6.6E-18 | -0.83   | 7.0E-18 | -0.79   | 1.0E-16 | -0.81   | 3.4E-18 | -0.79   | 1.2E-18 |
| C36:4 DAG-A     | C8-pos | Glycerolipids - Diacylglycerols  | HMDB07248* | -0.59   | 4.2E-09 | -0.36   | 5.3E-05 | -0.59   | 4.3E-09 | -0.61   | 2.9E-09 | -0.60   | 1.0E-08 | -0.62   | 2.1E-09 | -0.42   | 1.3E-02 | -0.61   | 2.7E-11 | -0.31   | 1.2E-04 | -0.60   | 7.7E-11 | -0.65   | 2.9E-11 | -0.61   | 3.7E-10 | -0.63   | 2.9E-11 | -0.62   | 1.3E-11 |
| C36:4 DAG-B     | C8-pos | Glycerolipids - Diacylglycerols  | HMDB07248* | -0.33   | 1.1E-03 | -0.14   | 1.5E-01 | -0.33   | 1.3E-03 | -0.36   | 7.5E-04 | -0.35   | 9.8E-04 | -0.34   | 9.5E-04 | -0.06   | 7.8E-01 | -0.43   | 1.2E-06 | -0.12   | n/a     | -0.42   | 2.8E-06 | -0.41   | 1.2E-05 | -0.46   | 4.8E-06 | -0.46   | 3.9E-07 | -0.43   | n/a     |
| C38:3 DAG       | C8-pos | Glycerolipids - Diacylglycerols  | HMDB07168* | -0.72   | 2.1E-13 | -0.50   | 1.2E-08 | -0.72   | 2.4E-13 | -0.74   | 3.9E-13 | -0.74   | 4.0E-13 | -0.76   | 4.9E-14 | -0.57   | 1.8E-04 | -0.68   | 6.3E-14 | -0.37   | 1.3E-06 | -0.67   | 3.1E-13 | -0.69   | 1.2E-12 | -0.68   | 1.0E-12 | -0.72   | 1.2E-14 | -0.69   | 2.1E-14 |
| C42:0 TAG       | C8-pos | Glycerolipids - Triacylglycerols | HMDB42061* | -0.48   | 5.3E-07 | -0.34   | 2.6E-04 | -0.49   | 2.8E-07 | -0.50   | 6.2E-07 | -0.48   | 1.2E-06 | -0.51   | 2.5E-07 | -0.23   | 2.0E-01 | -0.54   | 4.5E-08 | -0.34   | 3.2E-04 | -0.56   | 1.5E-08 | -0.52   | 5.5E-12 | -0.50   | 1.5E-06 | -0.53   | 1.1E-07 | -0.54   | n/a     |
| C43:0 TAG       | C8-pos | Glycerolipids - Triacylglycerols | HMDB42062* | -0.31   | 6.2E-04 | -0.20   | 2.2E-02 | -0.32   | 3.0E-04 | -0.33   | 3.8E-04 | -0.31   | 7.4E-04 | -0.32   | 4.9E-04 | -0.11   | 5.0E-01 | -0.49   | 1.4E-06 | -0.32   | 1.3E-03 | -0.51   | 6.8E-07 | -0.47   | 1.7E-05 | -0.46   | 1.9E-05 | -0.48   | 4.1E-06 | -0.49   | n/a     |
| C43:1 TAG       | C8-pos | Glycerolipids - Triacylglycerols | HMDB42098* | -0.59   | 1.6E-09 | -0.45   | 2.6E-06 | -0.60   | 6.7E-10 | -0.60   | 3.8E-09 | -0.58   | 6.6E-09 | -0.62   | 5.4E-10 | -0.33   | 8.0E-02 | -0.48   | 1.2E-07 | -0.29   | 7.8E-04 | -0.51   | 3.3E-08 | -0.48   | 8.4E-07 | -0.47   | 1.2E-06 | -0.47   | 4.4E-07 | -0.49   | n/a     |
| C44:0 TAG       | C8-pos | Glycerolipids - Triacylglycerols | HMDB42063* | -0.51   | 2.5E-07 | -0.36   | 1.6E-04 | -0.52   | 1.3E-07 | -0.53   | 3.2E-07 | -0.51   | 6.7E-07 | -0.53   | 1.4E-07 | -0.31   | 1.0E-01 | -0.54   | 9.1E-09 | -0.34   | 1.5E-04 | -0.56   | 3.3E-09 | -0.52   | 4.0E-07 | -0.51   | 2.4E-07 | -0.55   | 1.7E-08 | -0.55   | 1.4E-09 |
| C44:1 TAG       | C8-pos | Glycerolipids - Triacylglycerols | HMDB42301* | -0.73   | 1.2E-12 | -0.56   | 1.1E-08 | -0.74   | 5.7E-13 | -0.76   | 1.1E-12 | -0.74   | 2.6E-12 | -0.77   | 4.8E-13 | -0.52   | 5.3E-03 | -0.65   | 1.2E-12 | -0.44   | 2.8E-07 | -0.67   | 2.7E-13 | -0.63   | 8.1E-11 | -0.61   | 1.9E-10 | -0.65   | 4.1E-12 | -0.66   | 3.3E-13 |
| C44:2 TAG       | C8-pos | Glycerolipids - Triacylglycerols | HMDB47770* | -0.72   | 2.7E-12 | -0.53   | 3.5E-08 | -0.73   | 1.4E-12 | -0.74   | 2.4E-12 | -0.73   | 6.3E-12 | -0.76   | 6.5E-13 | -0.47   | 9.9E-03 | -0.64   | 6.3E-12 | -0.41   | 1.4E-06 | -0.66   | 1.5E-12 | -0.62   | 3.0E-10 | -0.59   | 9.8E-10 | -0.64   | 1.9E-11 | -0.65   | 1.4E-12 |
| C45:0 TAG       | C8-pos | Glycerolipids - Triacylglycerols | HMDB42093* | -0.21   | 2.9E-02 | -0.16   | 1.1E-01 | -0.23   | 1.5E-02 | -0.24   | 1.8E-02 | -0.22   | 2.9E-02 | -0.22   | 2.7E-02 | -0.05   | 8.0E-01 | -0.40   | 5.5E-05 | -0.25   | n/a     | -0.42   | 2.0E-05 | -0.38   | 2.7E-04 | -0.38   | 2.3E-04 | -0.38   | 1.9E-04 | -0.40   | n/a     |
| C45:1 TAG       | C8-pos | Glycerolipids - Triacylglycerols | HMDB42099* | -0.76   | 1.2E-13 | -0.61   | 8.2E-10 | -0.78   | 3.0E-14 | -0.79   | 1.4E-13 | -0.77   | 3.0E-13 | -0.79   | 8.4E-13 | -0.56   | 1.9E-03 | -0.63   | 8.2E-12 | -0.43   | 6.0E-07 | -0.65   | 1.7E-12 | -0.62   | 3.1E-10 | -0.62   | 3.1E-10 | -0.62   | 5.4E-11 | -0.64   | 3.2E-10 |
| C45:2 TAG       | C8-pos | Glycerolipids - Triacylglycerols | HMDB43170* | -0.81   | 7.2E-15 | -0.64   | 1.6E-10 | -0.83   | 2.3E-15 | -0.84   | 1.3E-14 | -0.82   | 3.0E-14 | -0.85   | 3.5E-15 | -0.59   | 8.3E-04 | -0.63   | 4.9E-12 | -0.42   | 4.9E-07 | -0.64   | 1.7E-12 | -0.61   | 2.5E-10 | -0.60   | 2.6E-10 | -0.62   | 3.4E-11 | -0.64   | 1.0E-12 |
| C46:0 TAG       | C8-pos | Glycerolipids - Triacylglycerols | n/a        | -0.50   | 1.1E-07 | -0.32   | 2.9E-04 | -0.50   | 6.5E-08 | -0.47   | 1.4E-06 | -0.46   | 1.9E-06 | -0.53   | 3.6E-08 | -0.26   | 1.4E-01 | -0.50   | 1.1E-07 | -0.30   | 6.3E-04 | -0.51   | 5.2E-08 | -0.45   | 2.5E-08 | -0.45   | 3.6E-06 | -0.50   | 1.9E-07 | -0.51   | n/a     |
| C46:0 TAG       | C8-pos | Glycerolipids - Triacylglycerols | HMDB10411* | -0.46   | 4.6E-06 | -0.34   | 7.1E-04 | -0.47   | 3.3E-06 | -0.47   | 7.4E-06 | -0.46   | 1.1E-05 | -0.48   | 3.1E-06 | -0.32   | 1.0E-01 | -0.52   | 1.0E-08 | -0.34   | 1.1E-04 | -0.54   | 3.5E-09 | -0.49   | 3.5E-07 | -0.49   | 2.3E-07 | -0.53   | 1.6E-08 | -0.53   | n/a     |
| C46:1 TAG       | C8-pos | Glycerolipids - Triacylglycerols | HMDB10412* | -0.76   | 2.0E-13 | -0.58   | 2.0E-09 | -0.77   | 9.0E-14 | -0.78   | 2.1E-13 | -0.77   | 5.7E-13 | -0.79   | 1.3E-13 | -0.57   | 1.8E-03 | -0.69   | 1.5E-14 | -0.47   | 1.1E-08 | -0.71   | 2.8E-15 | -0.67   | 2.0E-12 | -0.65   | 2.7E-12 | -0.67   | 2.8E-14 | -0.70   | 3.7E-15 |
| C46:2 TAG       | C8-pos | Glycerolipids - Triacylglycerols | HMDB10419* | -0.86   | 1.4E-16 | -0.66   | 5.5E-12 | -0.87   | 6.2E-17 | -0.89   | 1.6E-16 | -0.87   | 5.2E-16 | -0.89   | 6.1E-17 | -0.65   | 3.1E-03 | -0.77   | 2.2E-17 | -0.53   | 9.6E-11 | -0.79   | 5.7E-18 | -0.75   | 5.0E-18 | -0.73   | 1.4E-14 | -0.74   | 2.8E-17 | -0.78   | 6.2E-18 |
| C46:3 TAG       | C8-pos | Glycerolipids - Triacylglycerols | HMDB42541* | -0.82   | 3.4E-15 | -0.60   | 2.1E-10 | -0.82   | 2.0E-15 | -0.85   | 3.3E-15 | -0.83   | 1.2E-14 | -0.86   | 8.1E-16 | -0.58   | 1.1E-04 | -0.73   | 1.2E-15 | -0.48   | 3.4E-09 | -0.74   | 4.8E-16 | -0.72   | 1.0E-13 | -0.69   | 4.5E-13 | -0.74   | 3.8E-17 | -0.74   | 3.4E-16 |
| C46:4 TAG       | C8-pos | Glycerolipids - Triacylglycerols | HMDB42781* | -0.69   | 6.9E-12 | -0.49   | 1.8E-07 | -0.70   | 4.9E-12 | -0.72   | 7.9E-12 | -0.70   | 2.4E-11 | -0.74   | 1.3E-12 | -0.44   | 1.6E-02 | -0.60   | 1.9E-10 | -0.37   | 1.8E-05 | -0.61   | 7.9E-11 | -0.58   | 5.1E-09 | -0.55   | 1.8E-08 | -0.60   | 3.5E-10 | -0.61   | 5.2E-11 |
| C47:1 TAG       | C8-pos | Glycerolipids - Triacylglycerols | HMDB42100* | -0.75   | 2.0E-13 | -0.61   | 8.0E-10 | -0.77   | 3.3E-14 | -0.77   | 2.3E-13 | -0.76   | 4.0E-13 | -0.78   | 1.2E-13 | -0.59   | 1.5E-03 | -0.75   | 4.5E-16 | -0.55   | 2.7E-10 | -0.78   | 2.9E-17 | -0.73   | 7.1E-14 | -0.73   | 3.9E-14 | -0.70   | 1.0E-16 | -0.76   | 1.1E-16 |
| C47:2 TAG       | C8-pos | Glycerolipids - Triacylglycerols | HMDB48435* | -0.92   | 6.4E-19 | -0.73   | 4.2E-14 | -0.94   | 1.3E-19 | -0.94   | 1.1E-18 | -0.94   | 1.7E-18 | -0.95   | 4.2E-19 | -0.74   | 3.8E-05 | -0.85   | 1.7E-20 | -0.62   | 6.8E-14 | -0.87   | 1.9E-21 | -0.82   | 1.5E-17 | -0.82   | 6.6E-18 | -0.84   | 3.0E-19 | -0.86   | 3.5E-21 |
| C48:0 TAG       | C8-pos | Glycerolipids - Triacylglycerols | HMDB05356* | -0.40   | 9.2E-05 | -0.27   | 6.8E-03 | -0.40   | 8.1E-05 | -0.40   | 2.2E-04 | -0.39   | 2.5E-04 | -0.42   | 7.1E-05 | -0.25   | 2.1E-01 | -0.43   | 9.4E-07 | -0.25   | 3.4E-03 | -0.45   | 4.2E-07 | -0.40   | 2.0E-05 | -0.41   | 1.1E-05 | -0.40   | 8.8E-07 | -0.44   | n/a     |
| C48:1 TAG       | C8-pos | Glycerolipids - Triacylglycerols | HMDB05359* | -0.74   | 2.9E-13 | -0.58   | 1.2E-09 | -0.75   | 1.7E-13 | -0.76   | 5.1E-13 | -0.75   | 1.2E-12 | -0.77   | 2.0E-13 | -0.61   | 7.7E-04 | -0.75   | 2.4E-17 | -0.51   | 2.7E-10 | -0.77   | 6.0E-18 | -0.73   | 6.2E-15 | -0.72   | 6.6E-15 | -0.76   | 5.0E-17 | -0.76   | 4.7E-18 |
| C48:2 TAG       | C8-pos | Glycerolipids - Triacylglycerols | HMDB05376* | -0.91   | 1.7E-23 | -0.71   | 1.2E-13 | -0.92   | 7.9E-19 | -0.94   | 2.4E-18 | -0.92   | 1.0E-17 | -0.94   | 1.4E-18 | -0.76   | 3.2E-06 | -0.86   | 2.7E-22 | -0.61   | 7.5E-15 | -0.87   | 7.3E-23 | -0.84   | 1.8E-19 | -0.83   | 2.2E-19 | -0.87   | 4.9E-22 | -0.87   | 6.4E-23 |
| C48:3 TAG       | C8-pos | Glycerolipids - Triacylglycerols | HMDB05432* | -1.02   | 7.5E-23 | -0.79   | 1.1E-17 | -1.03   | 4.4E-23 | -1.06   | 1.0E-22 | -1.04   | 4.8E-22 | -1.06   | 4.0E-23 | -0.83   | 2.6E-06 | -0.92   | 1.2E-24 | -0.65   | 3.9E-17 | -       |         |         |         |         |         |         |         |         |         |

| Metabolite name        | Method   | Category                                                | HMDB ID    | WHI-O5  |         |         |         |         |         |         |         |         |         |         |         |         |         | WHI-HT  |         |         |         |         |         |         |         |         |         |         |         |         |         |       |     |
|------------------------|----------|---------------------------------------------------------|------------|---------|---------|---------|---------|---------|---------|---------|---------|---------|---------|---------|---------|---------|---------|---------|---------|---------|---------|---------|---------|---------|---------|---------|---------|---------|---------|---------|---------|-------|-----|
|                        |          |                                                         |            | Model 1 |         | Model 2 |         | Model 3 |         | Model 4 |         | Model 5 |         | Model 6 |         | Model 7 |         | Model 1 |         | Model 2 |         | Model 3 |         | Model 4 |         | Model 5 |         | Model 6 |         | Model 7 |         |       |     |
|                        |          |                                                         |            | Beta    | FDR     |       |     |
| C14:0 LPC-B            | C8-pos   | Glycerophospholipids - Lysophosphatidylcholines         | HMDB10379* | -0.69   | 1.2E-13 | -0.58   | 4.7E-10 | -0.70   | 6.8E-14 | -0.70   | 4.1E-13 | -0.70   | 4.4E-13 | -0.69   | 7.2E-13 | -0.56   | 3.2E-04 | -0.62   | 1.6E-10 | -0.57   | 3.5E-09 | -0.63   | 9.3E-11 | -0.59   | 9.3E-09 | -0.60   | 4.0E-09 | -0.61   | 1.0E-09 | -0.63   | 5.8E-11 |       |     |
| C15:0 LPC              | C8-pos   | Glycerophospholipids - Lysophosphatidylcholines         | HMDB10381  | -0.63   | 2.1E-10 | -0.52   | 1.9E-07 | -0.64   | 8.7E-11 | -0.64   | 3.5E-10 | -0.65   | 2.2E-10 | -0.64   | 4.0E-10 | -0.58   | 8.3E-04 | -0.85   | 2.2E-21 | -0.82   | 5.9E-20 | -0.86   | 1.7E-21 | -0.85   | 1.5E-19 | -0.85   | 1.0E-19 | -0.82   | 3.6E-19 | -0.86   | 4.9E-22 |       |     |
| C16:0 LPC              | C8-pos   | Glycerophospholipids - Lysophosphatidylcholines         | HMDB10382  | -0.35   | 1.6E-03 | -0.17   | 1.4E-01 | -0.35   | 1.9E-03 | -0.34   | 3.7E-03 | -0.34   | 3.7E-03 | -0.36   | 1.9E-03 | -0.35   | 9.9E-02 | -0.40   | 6.4E-06 | -0.35   | n/a     | -0.38   | 1.6E-05 | -0.42   | 6.1E-06 | -0.42   | 5.6E-06 | -0.42   | 3.7E-06 | -0.41   | n/a     |       |     |
| C16:1 LPC              | C8-pos   | Glycerophospholipids - Lysophosphatidylcholines         | HMDB10383  | -0.83   | 1.3E-15 | -0.73   | 2.2E-12 | -0.82   | 2.3E-15 | -0.83   | 1.6E-14 | -0.83   | 1.6E-14 | -0.83   | 6.6E-15 | -0.78   | 1.7E-05 | -0.96   | 4.5E-27 | -0.96   | 1.4E-26 | -0.95   | 4.1E-26 | -0.98   | 1.1E-25 | -0.98   | 1.3E-25 | -1.00   | 6.6E-28 | -0.96   | 1.8E-27 |       |     |
| C18:1 LPC              | C8-pos   | Glycerophospholipids - Lysophosphatidylcholines         | HMDB02815  | -0.22   | 3.4E-02 | -0.20   | 1.6E-01 | -0.23   | 4.2E-02 | -0.23   | 4.2E-02 | -0.23   | 4.2E-02 | -0.25   | 2.1E-02 | -0.24   | 2.4E-01 | -0.32   | 2.4E-04 | -0.40   | n/a     | -0.33   | 2.0E-04 | -0.38   | 3.6E-05 | -0.35   | 1.1E-04 | -0.35   | 8.7E-05 | -0.32   | n/a     |       |     |
| C18:2 LPC              | C8-pos   | Glycerophospholipids - Lysophosphatidylcholines         | HMDB10386* | -0.22   | 4.0E-02 | -0.20   | 6.6E-02 | -0.23   | 3.9E-02 | -0.22   | 5.4E-02 | -0.21   | 6.0E-02 | -0.24   | 2.9E-02 | -0.21   | 3.0E-01 | -0.28   | 9.3E-04 | -0.41   | n/a     | -0.29   | 7.5E-04 | -0.34   | n/a     | -0.29   | 7.4E-05 | -0.34   | n/a     | -0.28   | 1.4E-03 | -0.28 | n/a |
| C18:3 LPC              | C8-pos   | Glycerophospholipids - Lysophosphatidylcholines         | HMDB10387* | -0.35   | 6.2E-04 | -0.30   | 4.0E-03 | -0.34   | 9.9E-04 | -0.36   | 9.1E-04 | -0.36   | 9.2E-04 | -0.37   | 5.2E-04 | -0.24   | 2.0E-01 | -0.53   | 6.7E-09 | -0.60   | 1.1E-10 | -0.51   | 2.2E-08 | -0.53   | 7.2E-08 | -0.53   | 3.4E-08 | -0.55   | 3.9E-09 | -0.53   | n/a     |       |     |
| C20:3 LPC              | C8-pos   | Glycerophospholipids - Lysophosphatidylcholines         | HMDB10393* | -0.42   | 8.3E-05 | -0.33   | 2.3E-03 | -0.42   | 1.1E-04 | -0.46   | 3.4E-05 | -0.47   | 2.5E-05 | -0.44   | 6.5E-05 | -0.38   | 3.9E-02 | -0.49   | 1.1E-07 | -0.51   | 4.6E-08 | -0.48   | 2.4E-07 | -0.50   | 3.9E-07 | -0.50   | 4.0E-07 | -0.52   | 3.4E-08 | -0.49   | 9.4E-08 |       |     |
| C20:4 LPC              | C8-pos   | Glycerophospholipids - Lysophosphatidylcholines         | HMDB10395  | -0.42   | 5.5E-05 | 0.48    | 3.2E-06 | 0.42    | 6.0E-05 | 0.43    | 1.1E-04 | 0.42    | 1.2E-04 | 0.42    | 8.1E-05 | 0.49    | 5.3E-03 | 0.21    | 2.2E-02 | 0.11    | 2.1E-01 | 0.21    | 1.9E-02 | 0.20    | 3.7E-02 | 0.18    | 5.4E-02 | 0.18    | 5.1E-02 | 0.21    | 1.9E-02 |       |     |
| C22:6 LPC              | C8-pos   | Glycerophospholipids - Lysophosphatidylcholines         | HMDB10404* | 0.33    | 8.2E-04 | 0.36    | 4.3E-04 | 0.35    | 2.8E-04 | 0.36    | 3.8E-04 | 0.33    | 1.1E-03 | 0.32    | 1.4E-03 | 0.24    | 2.1E-01 | 0.47    | 1.9E-07 | 0.41    | 6.9E-06 | 0.52    | 1.2E-08 | 0.51    | 8.1E-08 | 0.47    | 1.1E-06 | 0.47    | 3.4E-07 | 0.47    | n/a     |       |     |
| C16:0 LPE              | C8-pos   | Glycerophospholipids - Lysophosphatidylethanolamines    | HMDB11503  | -0.49   | 1.1E-06 | -0.41   | 5.5E-05 | -0.48   | 1.7E-06 | -0.46   | 1.2E-05 | -0.46   | 1.3E-05 | -0.49   | 2.7E-06 | -0.44   | 9.9E-03 | -0.51   | 3.3E-08 | -0.50   | 1.1E-07 | -0.49   | 1.7E-07 | -0.51   | 1.2E-07 | -0.53   | 5.3E-08 | -0.55   | 8.6E-09 | -0.52   | 1.2E-08 |       |     |
| C18:0 LPE              | C8-pos   | Glycerophospholipids - Lysophosphatidylethanolamines    | HMDB11130* | -0.32   | 3.0E-03 | -0.19   | 8.6E-02 | -0.32   | 2.9E-03 | -0.33   | 3.6E-03 | -0.32   | 4.7E-03 | -0.33   | 2.3E-03 | -0.20   | 3.5E-01 | -0.40   | 1.9E-05 | -0.37   | n/a     | -0.40   | 3.1E-05 | -0.46   | 4.1E-06 | -0.43   | 1.1E-05 | -0.45   | 3.7E-06 | -0.41   | n/a     |       |     |
| C18:1 LPE              | C8-pos   | Glycerophospholipids - Lysophosphatidylethanolamines    | HMDB11506  | -0.43   | 3.3E-05 | -0.36   | 6.7E-04 | -0.44   | 2.5E-05 | -0.44   | 4.0E-05 | -0.43   | 5.7E-05 | -0.47   | 1.0E-05 | -0.27   | 1.9E-01 | -0.53   | 3.2E-08 | -0.55   | 1.7E-08 | -0.55   | 1.2E-08 | -0.60   | 3.4E-09 | -0.56   | 2.7E-08 | -0.57   | 7.9E-09 | -0.54   | n/a     |       |     |
| C18:2 LPE              | C8-pos   | Glycerophospholipids - Lysophosphatidylethanolamines    | HMDB11507* | -0.79   | 3.5E-14 | -0.72   | 1.0E-11 | -0.80   | 1.6E-14 | -0.82   | 2.8E-14 | -0.80   | 1.1E-13 | -0.82   | 1.9E-14 | -0.66   | 2.6E-04 | -0.89   | 8.7E-23 | -0.90   | 8.1E-23 | -0.91   | 2.4E-23 | -0.97   | 4.4E-24 | -0.90   | 2.5E-21 | -0.91   | 2.7E-22 | -0.90   | 5.6E-23 |       |     |
| C20:1 LPE              | C8-pos   | Glycerophospholipids - Lysophosphatidylethanolamines    | HMDB11512* | -0.48   | 4.1E-07 | -0.43   | 8.5E-06 | -0.48   | 3.6E-07 | -0.47   | 2.8E-06 | -0.49   | 9.2E-07 | -0.49   | 4.0E-07 | -0.53   | 8.0E-04 | -0.49   | 2.2E-07 | -0.55   | 9.7E-09 | -0.49   | 2.7E-07 | -0.49   | 9.5E-07 | -0.52   | 1.9E-07 | -0.49   | 3.4E-07 | -0.49   | 1.1E-07 |       |     |
| C20:4 LPE              | HLIC-pos | Glycerophospholipids - Lysophosphatidylethanolamines    | HMDB11517  | -0.38   | 4.8E-04 | -0.30   | 6.2E-03 | -0.39   | 3.5E-04 | -0.41   | 2.6E-04 | -0.41   | 3.3E-04 | -0.40   | 2.9E-04 | -0.23   | 2.9E-01 | -0.40   | 1.3E-05 | -0.45   | 1.7E-06 | -0.41   | 1.2E-05 | -0.43   | 3.1E-05 | -0.40   | 3.5E-05 | -0.45   | 1.5E-06 | -0.40   | n/a     |       |     |
| C20:4 LPE-A            | C8-pos   | Glycerophospholipids - Lysophosphatidylethanolamines    | HMDB11517  | -0.26   | 1.7E-02 | -0.19   | 9.6E-02 | -0.28   | 1.1E-02 | -0.29   | 1.2E-02 | -0.28   | 1.7E-02 | -0.28   | 1.5E-02 | -0.15   | 4.9E-01 | -0.47   | 2.8E-07 | -0.52   | n/a     | -0.48   | 2.0E-07 | -0.53   | 7.8E-08 | -0.50   | 3.0E-07 | -0.52   | 3.8E-08 | -0.48   | n/a     |       |     |
| C32:1 PC plasmalogen-A | C8-pos   | Glycerophospholipids - Phosphatidylcholine plasmalogens | HMDB13404* | 0.49    | 5.5E-07 | -0.52   | 9.0E-08 | -0.49   | 6.6E-07 | -0.43   | 3.1E-05 | -0.45   | 1.2E-05 | -0.54   | 7.7E-08 | -0.53   | 5.6E-03 | -0.50   | 5.3E-08 | -0.63   | 2.1E-12 | -0.49   | 1.3E-07 | -0.54   | 2.2E-08 | -0.54   | 1.3E-08 | -0.50   | 1.1E-07 | -0.49   | 4.8E-08 |       |     |
| C32:1 PC plasmalogen-B | C8-pos   | Glycerophospholipids - Phosphatidylcholine plasmalogens | HMDB13404* | 0.33    | 1.2E-03 | 0.32    | 5.0E-04 | 0.33    | 1.4E-03 | 0.40    | 1.3E-04 | 0.38    | 2.7E-04 | 0.30    | 3.8E-03 | 0.29    | 1.5E-03 | 0.40    | 1.3E-05 | 0.24    | 5.4E-03 | 0.42    | 7.7E-06 | 0.37    | 1.5E-04 | 0.33    | 5.0E-04 | 0.41    | 1.6E-05 | 0.40    | n/a     |       |     |
| C34:1 PC plasmalogen   | C8-pos   | Glycerophospholipids - Phosphatidylcholine plasmalogens | HMDB11208* | -0.29   | 8.1E-03 | -0.27   | 7.0E-03 | -0.29   | 6.9E-03 | -0.26   | 2.2E-02 | -0.26   | 2.0E-02 | -0.36   | 1.0E-03 | -0.39   | 7.0E-02 | -0.22   | 1.6E-02 | -0.35   | 5.0E-05 | -0.23   | 1.4E-02 | -0.32   | 1.1E-03 | -0.28   | 3.1E-03 | -0.24   | 1.0E-02 | -0.22   | n/a     |       |     |
| C34:2 PC plasmalogen-B | C8-pos   | Glycerophospholipids - Phosphatidylcholine plasmalogens | HMDB11210* | 0.22    | 2.6E-02 | 0.17    | 4.8E-02 | 0.22    | 2.7E-02 | 0.27    | 8.6E-03 | 0.26    | 1.4E-02 | 0.19    | 7.6E-02 | 0.11    | 6.1E-01 | 0.37    | 2.6E-05 | 0.14    | 6.3E-02 | 0.37    | 2.6E-05 | 0.34    | 2.2E-03 | 0.32    | 4.8E-04 | 0.34    | n/a     | 0.38    | n/a     |       |     |
| C34:3 PC plasmalogen   | C8-pos   | Glycerophospholipids - Phosphatidylcholine plasmalogens | HMDB11211* | 0.31    | 1.9E-03 | 0.28    | 1.3E-03 | 0.31    | 2.4E-03 | 0.38    | 2.2E-04 | 0.35    | 8.1E-04 | 0.40    | 4.7E-03 | 0.22    | 2.7E-01 | 0.49    | 1.3E-07 | 0.27    | 8.3E-04 | 0.48    | 2.7E-07 | 0.48    | 6.5E-07 | 0.48    | 4.9E-07 | 0.48    | 3.7E-07 | 0.50    | n/a     |       |     |
| C34:4 PC plasmalogen   | C8-pos   | Glycerophospholipids - Phosphatidylcholine plasmalogens | HMDB11212* | -0.37   | 5.4E-05 | -0.46   | 2.7E-07 | -0.37   | 5.8E-05 | -0.31   | 1.1E-03 | -0.33   | 5.2E-04 | -0.42   | 8.8E-06 | -0.41   | 5.2E-02 | -0.39   | 1.1E-04 | -0.50   | 9.5E-07 | -0.37   | 2.4E-04 | -0.44   | 3.8E-05 | -0.44   | 3.4E-05 | -0.38   | 2.3E-04 | -0.38   | 1.0E-04 |       |     |
| C36:2 PC plasmalogen-B | C8-pos   | Glycerophospholipids - Phosphatidylcholine plasmalogens | HMDB11243* | 0.50    | 1.0E-06 | 0.41    | 3.6E-06 | 0.48    | 2.5E-06 | 0.53    | 5.6E-07 | 0.52    | 8.3E-07 | 0.47    | 6.7E-06 | 0.33    | 8.2E-02 | 0.59    | 7.7E-12 | 0.36    | 1.3E-06 | 0.56    | 7.3E-11 | 0.54    | 1.8E-09 | 0.54    | 1.1E-09 | 0.57    | 9.9E-11 | 0.57    | n/a     |       |     |
| C36:3 PC plasmalogen-B | C8-pos   | Glycerophospholipids - Phosphatidylcholine plasmalogens | HMDB11244* | 0.35    | 7.0E-04 | 0.31    | 8.0E-04 | 0.33    | 1.4E-03 | 0.39    | 2.4E-04 | 0.37    | 6.1E-04 | 0.32    | 2.7E-03 | 0.18    | 3.6E-04 | 0.47    | 2.5E-07 | 0.25    | 1.4E-03 | 0.45    | 9.3E-07 | 0.41    | 1.0E-05 | 0.43    | 4.8E-06 | 0.46    | 8.4E-07 | 0.47    | n/a     |       |     |
| C36:4 PC plasmalogen-B | C8-pos   | Glycerophospholipids - Phosphatidylcholine plasmalogens | HMDB11310* | 0.27    | 1.2E-02 | 0.34    | 8.7E-04 | 0.25    | 1.8E-03 | 0.33    | 3.5E-03 | 0.30    | 8.5E-03 | 0.22    | 4.5E-02 | 0.26    | 2.4E-01 | 0.33    | 4.9E-04 | 0.22    | 1.0E-02 | 0.31    | 1.3E-03 | 0.34    | 7.5E-04 | 0.32    | 1.2E-03 | 0.33    | 8.0E-04 | 0.35    | n/a     |       |     |
| C36:5 PC plasmalogen-A | C8-pos   | Glycerophospholipids - Phosphatidylcholine plasmalogens | HMDB11221* | 0.24    | 1.7E-02 | 0.28    | 5.0E-03 | 0.26    | 1.1E-02 | 0.34    | 1.0E-03 | 0.29    | 6.7E-03 | 0.22    | 4.1E-02 | 0.14    | 4.9E-01 | 0.24    | 1.1E-02 | 0.14    | 1.2E-01 | 0.25    | 8.3E-03 | 0.31    | 1.8E-03 | 0.25    | 1.1E-02 | 0.24    | 1.1E-02 | 0.25    | n/a     |       |     |
| C36:5 PC plasmalogen-B | C8-pos   | Glycerophospholipids - Phosphatidylcholine plasmalogens | HMDB11220* | 0.58    | 1.6E-08 | 0.61    | 5.9E-10 | 0.57    | 2.8E-06 | 0.65    | 1.2E-09 | 0.61    | 1.4E-08 | 0.56    | 1.4E-07 | 0.54    | 5.9E-03 | 0.69    | 2.0E-13 | 0.53    | 6.3E-10 | 0.68    | 6.7E-13 | 0.73    | 1.7E-13 | 0.68    | 3.0E-12 | 0.68    | 1.2E-12 | 0.70    | 8.2E-14 |       |     |
| C38:4 PC plasmalogen-A | C8-pos   | Glycerophospholipids - Phosphatidylcholine plasmalogens | HMDB11252* | -0.24   | 3.1E-02 | -0.13   | 3.9E-01 | -0.26   | 1.9E-02 | -0.26   | 2.4E-02 | -0.26   | 2.2E-02 | -0.31   | 5.2E-03 | -0.25   | 2.4E-01 | -0.25   | 7.0E-03 | -0.29   | n/a     | -0.28   | 2.7E-03 | -0.30   | 2.4E-03 | -0.27   | 6.3E-03 | -0.28   | 1.2E-03 | -0.24   | n/a     |       |     |
| C38:4 PC plasmalogen-B | C8-pos   | Glycerophospholipids - Phosphatidylcholine plasmalogens | HMDB11252* | 0.34    | 1.7E-03 | 0.41    | 5.5E-05 | 0.30    | 4.5E-03 | 0.31    | 6.1E-03 | 0.32    | 5.9E-03 | 0.27    | 1.5E-02 | 0.30    | 1.5E-01 | 0.38    | 4.2E-05 | 0.30    | 5.6E-04 | 0.32    | 5.0E-04 | 0.33    | 8.5E-04 | 0.36    | 2.5E-04 | 0.38    | 8.0E-05 | 0.39    | n/a     |       |     |
| C38:6 PC plasmalogen-A | C8-pos   | Glycerophospholipids - Phosphatidylcholine plasmalogens | HMDB11319* | 0.58    | 3.2E-08 | 0.64    | 7.3E-10 | 0.59    | 1.8E-08 | 0.64    | 2.0E-09 | 0.60    | 3.0E-08 | 0.54    | 6.3E-07 | 0.43    | 3.7E-02 | 0.69    | 3.8E-14 | 0.62    | 8.5E-13 | 0.70    | 1.5E-14 | 0.73    | 1.8E-14 | 0.68    | 6.5E-13 | 0.71    | 3.4E-14 | 0.70    | 1.3E-14 |       |     |
| C38:6 PC plasmalogen-B | C8-pos   | Glycerophospholipids - Phosphatidylch                   |            |         |         |         |         |         |         |         |         |         |         |         |         |         |         |         |         |         |         |         |         |         |         |         |         |         |         |         |         |       |     |

| Metabolite name             | Method    | Category                           | HMDB ID     | WHI-OS  |         |         |         |         |         |         |         |         |         |         |         |         |         | WHI-HT  |         |         |         |         |         |         |         |         |         |         |         |         |         |
|-----------------------------|-----------|------------------------------------|-------------|---------|---------|---------|---------|---------|---------|---------|---------|---------|---------|---------|---------|---------|---------|---------|---------|---------|---------|---------|---------|---------|---------|---------|---------|---------|---------|---------|---------|
|                             |           |                                    |             | Model 1 |         | Model 2 |         | Model 3 |         | Model 4 |         | Model 5 |         | Model 6 |         | Model 7 |         | Model 1 |         | Model 2 |         | Model 3 |         | Model 4 |         | Model 5 |         | Model 6 |         | Model 7 |         |
|                             |           |                                    |             | Beta    | FDR     |
| C18:0 CE                    | C8-pos    | Sterol lipids - Cholesteryl esters | HMDB10368   | 0.21    | 4.4E-02 | 0.50    | 1.1E-09 | 0.18    | 8.2E-02 | 0.14    | 2.2E-01 | 0.14    | 2.1E-01 | 0.16    | 1.5E-01 | 0.20    | 3.5E-01 | 0.28    | 2.2E-03 | 0.38    | 3.8E-07 | 0.26    | n/a     | 0.26    | n/a     | 0.28    | n/a     | 0.30    | n/a     | 0.29    | n/a     |
| C18:1 CE                    | C8-pos    | Sterol lipids - Cholesteryl esters | HMDB000918  | 0.48    | 2.5E-07 | 0.45    | 5.7E-08 | 0.48    | 2.9E-07 | 0.48    | 8.0E-07 | 0.47    | 1.2E-06 | 0.50    | 2.3E-07 | 0.27    | 1.4E-01 | 0.61    | 7.3E-11 | 0.33    | 7.9E-05 | 0.63    | 2.8E-11 | 0.62    | 6.3E-10 | 0.59    | 2.4E-09 | 0.65    | 1.4E-11 | 0.62    | n/a     |
| C18:2 CE                    | C8-pos    | Sterol lipids - Cholesteryl esters | HMDB000610* | 0.54    | 1.3E-08 | 0.46    | 1.8E-07 | 0.53    | 1.9E-08 | 0.52    | 1.5E-07 | 0.53    | 1.4E-07 | 0.55    | 2.0E-08 | 0.29    | 9.9E-02 | 0.54    | 9.4E-09 | 0.24    | 3.7E-03 | 0.54    | 9.9E-09 | 0.51    | 2.2E-07 | 0.51    | 1.6E-07 | 0.59    | 7.4E-10 | 0.54    | n/a     |
| C20:1 CE                    | C8-pos    | Sterol lipids - Cholesteryl esters | HMDB05193   | 0.23    | 2.5E-02 | 0.37    | 1.3E-04 | 0.24    | 2.1E-02 | 0.25    | 2.1E-02 | 0.24    | 2.9E-02 | 0.22    | 4.7E-02 | -0.01   | 9.6E-01 | 0.63    | 4.4E-12 | 0.53    | 1.3E-10 | 0.65    | 6.3E-13 | 0.60    | 2.5E-10 | 0.61    | 7.8E-11 | 0.60    | 8.7E-11 | 0.63    | n/a     |
| C20:2 CE                    | C8-pos    | Sterol lipids - Cholesteryl esters | HMDB06734   | 0.50    | 1.6E-07 | 0.48    | 7.0E-08 | 0.51    | 1.1E-07 | 0.51    | 4.0E-07 | 0.51    | 3.9E-07 | 0.51    | 1.8E-07 | 0.32    | 7.2E-02 | 0.79    | 1.8E-18 | 0.54    | 2.5E-11 | 0.82    | 1.4E-19 | 0.78    | 2.7E-19 | 0.79    | 3.3E-17 | 0.81    | 2.2E-18 | 0.80    | n/a     |
| C20:3 CE                    | C8-pos    | Sterol lipids - Cholesteryl esters | HMDB06736*  | 0.49    | 1.9E-06 | 0.48    | 6.9E-07 | 0.49    | 1.7E-06 | 0.45    | 2.9E-05 | 0.44    | 4.4E-05 | 0.49    | 4.0E-06 | 0.30    | 1.4E-01 | 0.53    | 2.0E-08 | 0.30    | 6.2E-04 | 0.54    | 1.3E-08 | 0.60    | 2.3E-09 | 0.56    | 2.1E-08 | 0.56    | 9.5E-09 | 0.54    | n/a     |
| C20:4 CE                    | C8-pos    | Sterol lipids - Cholesteryl esters | HMDB06726   | 1.07    | 6.9E-28 | 1.02    | 6.5E-29 | 1.06    | 1.3E-27 | 1.05    | 4.0E-25 | 1.04    | 4.1E-25 | 1.07    | 7.3E-27 | 0.93    | 1.2E-07 | 1.12    | 2.1E-33 | 0.85    | 7.7E-25 | 1.12    | 2.8E-33 | 1.14    | 1.9E-31 | 1.10    | 4.4E-30 | 1.14    | 5.7E-33 | 1.13    | 6.0E-34 |
| C20:5 CE                    | C8-pos    | Sterol lipids - Cholesteryl esters | HMDB06731   | 0.47    | 5.0E-06 | 0.53    | 7.3E-08 | 0.49    | 1.6E-06 | 0.51    | 1.2E-06 | 0.48    | 8.2E-06 | 0.51    | 4.3E-06 | 0.31    | 1.1E-01 | 0.40    | 4.6E-06 | 0.23    | 4.0E-03 | 0.43    | 8.8E-07 | 0.47    | 3.6E-07 | 0.41    | 8.7E-06 | 0.42    | 3.4E-06 | 0.40    | n/a     |
| C22:4 CE                    | C8-pos    | Sterol lipids - Cholesteryl esters | HMDB06729*  | 0.84    | 1.4E-20 | 0.76    | 2.7E-19 | 0.84    | 1.6E-20 | 0.82    | 2.2E-18 | 0.83    | 1.3E-18 | 0.87    | 8.2E-21 | 0.80    | 3.4E-07 | 1.07    | 1.7E-30 | 0.78    | 2.4E-21 | 1.10    | 9.9E-32 | 1.10    | 1.1E-28 | 1.09    | 6.7E-29 | 1.08    | 1.1E-29 | 1.09    | 1.4E-31 |
| C22:5 CE                    | C8-pos    | Sterol lipids - Cholesteryl esters | HMDB10375*  | 0.93    | 4.9E-19 | 0.91    | 2.7E-19 | 0.93    | 6.8E-19 | 0.89    | 2.4E-16 | 0.89    | 2.4E-16 | 0.95    | 7.4E-19 | 0.79    | 4.1E-05 | 0.94    | 4.5E-27 | 0.74    | 1.6E-19 | 0.95    | 9.9E-28 | 1.00    | 8.4E-28 | 0.96    | 4.2E-26 | 0.95    | 1.7E-26 | 0.95    | 6.0E-28 |
| C22:6 CE                    | C8-pos    | Sterol lipids - Cholesteryl esters | HMDB06733   | 0.96    | 1.5E-23 | 0.93    | 5.8E-23 | 0.98    | 3.4E-24 | 1.00    | 1.7E-23 | 0.97    | 1.1E-22 | 0.96    | 2.4E-22 | 0.74    | 1.7E-05 | 1.24    | 4.9E-44 | 1.06    | 4.1E-36 | 1.27    | 5.4E-46 | 1.30    | 1.6E-43 | 1.24    | 1.0E-40 | 1.28    | 6.6E-45 | 1.24    | 4.6E-44 |
| C16:0 Ceramide (d18:1)      | C8-pos    | Sphingolipids - Ceramides          | HMDB04949   | -0.26   | 1.2E-02 | -0.03   | 7.6E-01 | -0.27   | 9.2E-03 | -0.27   | 1.2E-02 | -0.28   | 8.6E-03 | -0.30   | 4.3E-03 | -0.46   | 8.9E-03 | -0.27   | 5.0E-03 | -0.14   | n/a     | -0.29   | 3.1E-03 | -0.33   | 1.3E-03 | -0.29   | 4.2E-03 | -0.32   | 1.5E-03 | -0.27   | 5.1E-03 |
| C22:0 Ceramide (d18:1)      | C8-pos    | Sphingolipids - Ceramides          | HMDB04952   | -0.28   | 6.7E-03 | -0.01   | 9.0E-01 | -0.29   | 4.4E-03 | -0.33   | 1.9E-03 | -0.33   | 1.9E-03 | -0.33   | 1.4E-03 | -0.26   | 1.6E-01 | -0.38   | 8.1E-05 | -0.21   | n/a     | -0.42   | 1.1E-05 | -0.45   | 9.9E-06 | -0.37   | 1.8E-04 | -0.40   | 3.8E-05 | -0.38   | n/a     |
| C23:0 Ceramide (d18:1)      | C8-pos    | Sphingolipids - Ceramides          | HMDB00950   | -0.36   | 3.4E-04 | -0.31   | 3.0E-01 | -0.38   | 1.4E-04 | -0.40   | 1.1E-04 | -0.40   | 9.1E-05 | -0.41   | 6.9E-05 | -0.31   | 9.9E-02 | -0.50   | 3.8E-04 | -0.29   | 2.5E-03 | -0.31   | 2.7E-03 | -0.28   | 4.7E-03 | -0.31   | 1.9E-03 | -0.31   | 4.9E-04 | -0.31   | n/a     |
| C24:0 Ceramide (d18:1)      | C8-pos    | Sphingolipids - Ceramides          | HMDB04956   | -0.21   | 4.9E-02 | -0.06   | 5.6E-01 | -0.22   | 4.3E-02 | -0.26   | 2.1E-02 | -0.26   | 2.0E-02 | -0.26   | 1.9E-04 | -0.24   | 2.4E-01 | -0.21   | 2.6E-02 | -0.09   | n/a     | -0.24   | 1.1E-02 | -0.30   | 3.2E-03 | -0.22   | 2.6E-02 | -0.23   | 1.9E-02 | -0.21   | n/a     |
| C24:1 Ceramide (d18:1)      | C8-pos    | Sphingolipids - Ceramides          | HMDB04953   | -0.31   | 4.1E-03 | -0.11   | 3.3E-01 | -0.31   | 3.8E-03 | -0.26   | 2.3E-02 | -0.28   | 1.4E-02 | -0.36   | 9.5E-04 | -0.37   | 5.2E-02 | -0.31   | 1.0E-03 | -0.16   | n/a     | -0.29   | 2.1E-03 | -0.31   | 2.2E-03 | -0.33   | 2.4E-04 | -0.35   | 2.4E-04 | -0.31   | n/a     |
| sphinganine                 | HILIC-pos | Sphingolipids - Sphingolipids      | HMDB00269   | 0.33    | 6.9E-05 | 0.35    | 5.5E-05 | 0.34    | 6.0E-05 | 0.34    | 1.1E-04 | 0.34    | 1.3E-04 | 0.33    | 1.5E-04 | 0.37    | 8.9E-03 | 0.24    | 2.5E-02 | 0.26    | 1.6E-02 | 0.24    | 2.7E-02 | 0.21    | 6.9E-02 | 0.21    | 5.5E-02 | 0.21    | 5.1E-02 | 0.25    | 1.5E-02 |
| sphingosine-1-phosphate     | C18-neg   | Sphingolipids - Sphingolipids      | HMDB00277   | 0.23    | 4.9E-02 | 0.23    | 4.3E-02 | 0.22    | 4.7E-02 | 0.23    | 5.3E-02 | 0.23    | 5.3E-02 | 0.21    | 6.9E-02 | 0.17    | 4.5E-01 | 0.20    | 3.2E-02 | 0.16    | 9.3E-02 | 0.20    | 3.5E-02 | 0.15    | n/a     | 0.16    | n/a     | 0.20    | n/a     | 0.18    | n/a     |
| C14:0 SM                    | C8-pos    | Sphingolipids - Sphingomyelins     | HMDB12097   | -0.53   | 2.8E-07 | -0.37   | 9.2E-05 | -0.54   | 1.2E-07 | -0.55   | 4.1E-07 | -0.55   | 3.0E-07 | -0.53   | 5.1E-07 | -0.51   | 3.8E-03 | -0.47   | 3.8E-07 | -0.52   | 2.3E-11 | -0.50   | 9.2E-08 | -0.49   | 8.0E-07 | -0.48   | 8.5E-07 | -0.45   | 2.2E-06 | -0.47   | 2.7E-07 |
| C18:0 SM                    | C8-pos    | Sphingolipids - Sphingomyelins     | HMDB01348   | 0.30    | 4.8E-03 | 0.48    | 1.0E-07 | 0.28    | 7.2E-03 | 0.29    | 9.2E-03 | 0.29    | 9.0E-03 | 0.26    | 1.5E-02 | 0.14    | 4.9E-01 | 0.21    | 2.9E-02 | 0.21    | 9.8E-03 | 0.18    | 6.6E-02 | 0.18    | 7.4E-02 | 0.20    | 4.0E-02 | 0.21    | 3.2E-02 | 0.22    | n/a     |
| C18:1 SM                    | C8-pos    | Sphingolipids - Sphingomyelins     | HMDB12101   | 0.34    | 1.1E-03 | 0.49    | 1.6E-07 | 0.33    | 1.7E-03 | 0.35    | 1.4E-03 | 0.35    | 1.3E-03 | 0.30    | 5.0E-03 | 0.23    | 2.4E-01 | 0.28    | 2.3E-03 | 0.24    | 2.9E-03 | 0.25    | 5.7E-03 | 0.21    | 2.8E-02 | 0.24    | 1.0E-02 | 0.27    | 3.5E-03 | 0.29    | n/a     |
| C24:1 SM                    | C8-pos    | Sphingolipids - Sphingomyelins     | HMDB12107   | 0.31    | 6.5E-03 | 0.44    | 1.3E-05 | 0.32    | 5.1E-03 | 0.35    | 2.8E-03 | 0.33    | 4.7E-03 | 0.28    | 1.7E-02 | 0.13    | 5.9E-01 | 0.42    | 2.4E-06 | 0.35    | 8.8E-06 | 0.45    | 5.3E-07 | 0.41    | 1.4E-05 | 0.38    | 3.4E-05 | 0.41    | 8.1E-06 | 0.42    | n/a     |
| 2-hydroxyhexadecanoate      | C18-neg   | Fatty acids                        | HMDB31057   | -0.30   | 6.4E-03 | -0.30   | 9.3E-03 | -0.30   | 7.1E-03 | -0.26   | 2.9E-02 | -0.26   | 2.6E-02 | -0.31   | 6.5E-03 | -0.40   | 5.2E-02 | -0.28   | 1.9E-03 | -0.28   | 2.7E-03 | -0.25   | 5.5E-03 | -0.31   | 1.4E-03 | -0.31   | 1.0E-03 | -0.30   | 1.6E-03 | -0.32   | n/a     |
| 8,11,14-eicosatrienoic acid | C18-neg   | Fatty acids                        | HMDB02925   | -0.29   | 5.5E-03 | -0.28   | 7.9E-03 | -0.28   | 7.4E-03 | -0.26   | 1.5E-02 | -0.27   | 1.2E-02 | -0.27   | 1.2E-02 | -0.31   | 1.3E-01 | -0.30   | 7.0E-04 | -0.26   | 4.3E-03 | -0.26   | 2.7E-03 | -0.28   | 3.0E-03 | -0.30   | 1.0E-03 | -0.31   | 4.9E-04 | -0.33   | n/a     |
| eicosanedioate              | C18-neg   | Fatty acids                        | n/a         | -0.32   | 1.4E-03 | -0.31   | 3.8E-03 | -0.32   | 2.0E-03 | -0.37   | 6.5E-04 | -0.38   | 5.5E-04 | 0.25    | 1.9E-04 | -0.31   | 6.6E-01 | -0.34   | 3.8E-04 | -0.29   | 2.5E-03 | -0.31   | 2.7E-03 | -0.28   | 4.8E-03 | -0.31   | 1.9E-03 | -0.31   | 4.2E-04 | -0.31   | 9.8E-04 |
| gamma-linolenic acid        | C18-neg   | Fatty acids                        | HMDB03073   | -0.37   | 8.5E-04 | -0.39   | 6.0E-04 | -0.35   | 1.5E-03 | -0.35   | 3.2E-03 | -0.35   | 3.3E-03 | -0.35   | 2.6E-03 | -0.27   | 2.4E-01 | -0.38   | 3.2E-05 | -0.40   | 2.2E-05 | -0.35   | 1.3E-04 | -0.38   | 1.0E-04 | -0.38   | 7.7E-05 | -0.41   | 1.1E-05 | -0.41   | n/a     |
| hexadecanedioate            | C18-neg   | Fatty acids                        | HMDB00672   | -0.61   | 6.2E-09 | -0.63   | 4.4E-09 | -0.61   | 4.3E-09 | -0.59   | 7.2E-08 | -0.57   | 1.5E-07 | -0.62   | 7.9E-09 | -0.67   | 3.8E-04 | -0.59   | 4.3E-11 | -0.60   | 4.1E-11 | -0.60   | 2.9E-11 | -0.60   | 2.9E-11 | -0.60   | 6.5E-10 | -0.62   | 5.3E-12 | -0.62   | 1.3E-12 |
| hydroxymyristate            | C18-neg   | Fatty acids                        | HMDB02261   | -0.67   | 4.1E-10 | -0.68   | 6.0E-10 | -0.67   | 4.1E-10 | -0.65   | 7.2E-09 | -0.66   | 6.0E-09 | -0.69   | 5.0E-10 | -0.76   | 1.0E-04 | -0.69   | 7.1E-14 | -0.72   | 2.8E-14 | -0.68   | 2.6E-13 | -0.71   | 2.7E-13 | -0.71   | 1.4E-13 | -0.69   | 2.0E-13 | -0.72   | 2.3E-15 |
| myristic acid               | C18-neg   | Fatty acids                        | HMDB00806   | -0.21   | 3.4E-02 | -0.23   | 2.2E-02 | -0.21   | 2.9E-02 | -0.19   | 6.7E-02 | -0.19   | 6.8E-02 | -0.20   | 4.2E-02 | -0.11   | 5.1E-01 | -0.21   | 1.4E-02 | -0.23   | 1.0E-02 | -0.23   | 9.0E-03 | -0.21   | n/a     | -0.21   | n/a     | -0.21   | 1.7E-02 | -0.24   | n/a     |
| oleate                      | C18-neg   | Fatty acids                        | HMDB00207   | -0.30   | 3.1E-03 | -0.33   | 1.2E-03 | -0.30   | 3.4E-03 | -0.28   | 9.6E-03 | -0.27   | 1.0E-02 | -0.29   | 4.9E-03 | -0.18   | 3.9E-01 | -0.29   | 3.2E-03 | -0.32   | 1.4E-03 | -0.29   | 3.7E-03 | -0.33   | 1.3E-03 | -0.32   | 2.0E-03 | -0.31   | 2.2E-03 | -0.33   | n/a     |
| palmitoleic acid            | C18-neg   | Fatty acids                        | HMDB03229   | -0.84   | 2.6E-15 | -0.91   | 4.8E-17 | -0.84   | 3.2E-15 | -0.83   | 9.2E-14 | -0.83   | 1.3E-13 | -0.81   | 1.1E-13 | -0.77   | 6.5E-05 | -0.74   | 2.1E-17 | -0.79   | 3.2E-19 | -0.73   | 6.5E-17 | -0.76   | 1.5E-16 | -0.77   | 2.8E-17 | -0.77   | 2.8E-17 | -0.77   | 6.5E-19 |
| sebacate                    | C18-neg   | Fatty acids                        | HMDB00792   | -0.29   | 2.9E-03 | -0.31   | 1.7E-03 | -0.31   | 1.9E-03 | -0.28   | 6.1E-03 | -0.27   | 9.0E-03 | -0.32   | 1.7E-03 | -0.39   | 3.9E-03 | -0.37   | 1.4E-04 | -0.36   | 3.2E-04 | -0.41   | 3.7E-05 | -0.39   | 1.9E-04 | -0.36   | 8.4E-04 | -0.40   | 6.0E-05 | -0.41   | 2.5E-05 |
| C12:1 carnitine             | HILIC-pos |                                    |             |         |         |         |         |         |         |         |         |         |         |         |         |         |         |         |         |         |         |         |         |         |         |         |         |         |         |         |         |

| Metabolite name                    | Method    | Category                             | HMDB ID   | WHI-OS  |         |         |         |         |         |         |         |         |         |         |         |         |         | WHI-HT  |         |         |         |         |         |         |         |         |         |         |         |         |         |
|------------------------------------|-----------|--------------------------------------|-----------|---------|---------|---------|---------|---------|---------|---------|---------|---------|---------|---------|---------|---------|---------|---------|---------|---------|---------|---------|---------|---------|---------|---------|---------|---------|---------|---------|---------|
|                                    |           |                                      |           | Model 1 |         | Model 2 |         | Model 3 |         | Model 4 |         | Model 5 |         | Model 6 |         | Model 7 |         | Model 1 |         | Model 2 |         | Model 3 |         | Model 4 |         | Model 5 |         | Model 6 |         | Model 7 |         |
|                                    |           |                                      |           | Beta    | FDR     |
| kynurenic acid                     | HILIC-pos | Indoles and Indole derivatives       | HMDB00715 | -0.44   | 2.4E-05 | -0.41   | 1.3E-04 | -0.44   | 2.6E-05 | -0.37   | 6.2E-04 | -0.40   | 1.7E-04 | -0.45   | 2.3E-05 | -0.45   | 9.8E-03 | -0.28   | 2.3E-03 | -0.27   | 3.6E-03 | -0.29   | 1.6E-03 | -0.20   | 4.1E-02 | -0.25   | 1.0E-02 | -0.29   | 1.8E-03 | -0.28   | 2.0E-03 |
| 1-methylnicotinamide               | HILIC-pos | Pyridines and derivatives            | HMDB00699 | -0.44   | 1.8E-05 | -0.43   | 3.9E-05 | -0.43   | 3.1E-05 | -0.40   | 2.0E-04 | -0.41   | 1.4E-04 | -0.46   | 1.5E-05 | -0.34   | 5.3E-02 | -0.25   | 7.4E-03 | -0.27   | 5.3E-03 | -0.24   | 1.1E-02 | -0.19   | 6.0E-02 | -0.25   | 1.2E-02 | -0.25   | 9.4E-03 | -0.26   | n/a     |
| 4-pyridoxate                       | HILIC-neg | Pyridines and derivatives            | HMDB00017 | -0.35   | 6.4E-04 | -0.35   | 8.3E-04 | -0.33   | 1.4E-03 | -0.35   | 8.5E-04 | -0.36   | 6.5E-04 | -0.38   | 2.8E-04 | -0.31   | 1.6E-01 | -0.32   | 5.8E-04 | -0.31   | 9.2E-04 | -0.28   | 2.4E-03 | -0.22   | 2.2E-02 | -0.26   | 7.8E-03 | -0.33   | 4.0E-04 | -0.32   | n/a     |
| N1-methyl-2-pyridone-5-carboxamide | HILIC-pos | Pyridines and derivatives            | HMDB04193 | -0.39   | 2.6E-04 | -0.37   | 7.4E-04 | -0.37   | 4.7E-04 | -0.38   | 5.8E-04 | -0.41   | 2.3E-04 | -0.42   | 1.0E-04 | -0.35   | 9.1E-02 | -0.31   | 1.0E-03 | -0.28   | 3.6E-03 | -0.28   | 2.6E-03 | -0.21   | 3.8E-02 | -0.29   | 3.8E-03 | -0.32   | 7.2E-04 | -0.31   | n/a     |
| adipate                            | HILIC-neg | Organic acids and derivatives        | HMDB00448 | -0.32   | 1.9E-03 | -0.32   | 2.0E-03 | -0.32   | 1.6E-03 | -0.28   | 9.9E-03 | -0.27   | 1.1E-02 | -0.30   | 5.3E-03 | -0.27   | 1.3E-01 | -0.32   | 1.2E-03 | -0.33   | 1.1E-03 | -0.33   | 7.3E-04 | -0.34   | 1.4E-03 | -0.33   | 1.8E-03 | -0.34   | 7.9E-04 | -0.32   | n/a     |
| methylmalonate                     | HILIC-neg | Organic acids and derivatives        | HMDB00202 | -0.48   | 3.9E-06 | -0.46   | 1.8E-05 | -0.49   | 2.8E-06 | -0.42   | 1.2E-04 | -0.40   | 2.1E-04 | -0.52   | 1.3E-06 | -0.37   | 5.1E-02 | -0.45   | 1.1E-06 | -0.48   | 6.6E-07 | -0.47   | 3.7E-07 | -0.48   | 1.1E-06 | -0.44   | 5.4E-06 | -0.47   | 7.7E-07 | -0.43   | n/a     |
| 2-phosphoglycerate                 | HILIC-neg | Organic acids and derivatives        | HMDB00362 | 0.25    | 1.6E-02 | 0.27    | 1.2E-02 | 0.25    | 1.7E-02 | 0.26    | 1.6E-02 | 0.26    | 1.8E-02 | 0.23    | 2.9E-02 | 0.43    | 2.7E-02 | 0.39    | 8.0E-05 | 0.35    | 5.2E-04 | 0.38    | 1.1E-04 | 0.37    | 4.6E-04 | 0.40    | 9.5E-05 | 0.39    | 1.4E-04 | 0.40    | 4.0E-05 |
| hexose monophosphate               | HILIC-neg | Carbohydrates and conjugates         | HMDB00124 | 0.32    | 4.5E-03 | 0.34    | 2.9E-03 | 0.32    | 4.2E-03 | 0.34    | 4.1E-03 | 0.34    | 3.6E-03 | 0.31    | 7.6E-03 | 0.29    | 1.8E-01 | 0.33    | 4.3E-04 | 0.30    | 2.0E-03 | 0.33    | 4.3E-04 | 0.30    | 2.8E-03 | 0.31    | 1.2E-03 | 0.33    | 6.6E-04 | 0.33    | n/a     |
| lactose                            | HILIC-neg | Carbohydrates and conjugates         | HMDB00186 | 0.23    | 4.9E-02 | 0.24    | 4.4E-02 | 0.23    | 4.2E-02 | 0.22    | 6.5E-02 | 0.23    | 6.3E-02 | 0.22    | 6.4E-02 | 0.24    | 2.9E-01 | 0.32    | 6.3E-04 | 0.32    | 7.2E-04 | 0.32    | 7.2E-04 | 0.30    | n/a     | 0.30    | n/a     | 0.29    | n/a     | 0.32    | n/a     |
| pentose monophosphate              | HILIC-neg | Carbohydrates and conjugates         | HMDB01548 | 0.28    | 1.0E-02 | 0.30    | 7.9E-03 | 0.29    | 8.0E-03 | 0.28    | 1.7E-02 | 0.29    | 1.2E-02 | 0.27    | 1.9E-02 | 0.25    | 2.4E-01 | 0.25    | 6.5E-03 | 0.23    | 1.5E-02 | 0.26    | 5.5E-03 | 0.25    | 8.9E-03 | 0.25    | 8.3E-03 | 0.24    | 1.2E-02 | 0.25    | n/a     |
| acetaminophen                      | HILIC-pos | Benzene, Benzenoids, and derivatives | HMDB01859 | -0.35   | 4.3E-03 | -0.41   | 1.0E-03 | -0.35   | 4.8E-03 | -0.38   | 2.7E-03 | -0.37   | 3.4E-03 | -0.33   | 8.9E-03 | -0.43   | 8.4E-02 | -0.29   | 1.4E-04 | -0.30   | 1.3E-04 | -0.28   | 2.7E-04 | -0.31   | 1.7E-04 | -0.31   | 1.0E-04 | -0.31   | 8.5E-05 | -0.28   | n/a     |
| allantoin                          | HILIC-pos | Others                               | HMDB00462 | -0.29   | 1.8E-03 | -0.30   | 1.6E-03 | -0.28   | 3.0E-03 | -0.28   | 3.5E-03 | -0.31   | 1.5E-03 | -0.31   | 1.2E-03 | -0.30   | 9.9E-02 | -0.22   | 2.7E-02 | -0.21   | 3.8E-02 | -0.21   | 3.5E-02 | -0.18   | 9.4E-02 | -0.22   | 3.3E-02 | -0.25   | 1.6E-02 | -0.21   | n/a     |
| caffeine                           | HILIC-pos | Others                               | HMDB01847 | -0.53   | 1.9E-06 | -0.52   | 7.2E-06 | -0.57   | 2.5E-07 | -0.53   | 5.2E-06 | -0.50   | 1.9E-05 | -0.56   | 1.1E-06 | -0.57   | 7.4E-03 | -0.32   | 1.7E-04 | -0.26   | 2.4E-03 | -0.34   | 9.1E-05 | -0.36   | 7.5E-05 | -0.36   | 6.9E-05 | -0.32   | 3.4E-04 | -0.34   | 7.6E-05 |
| carboxybupropfen                   | C18-neg   | Others                               | n/a       | -0.29   | 8.9E-03 | -0.33   | 3.2E-03 | -0.30   | 5.5E-03 | -0.32   | 5.9E-03 | -0.30   | 9.0E-03 | -0.29   | 1.2E-02 | -0.17   | 4.3E-01 | -0.22   | 1.5E-02 | -0.25   | 6.9E-03 | -0.25   | 5.1E-03 | -0.16   | 9.0E-02 | -0.15   | 1.2E-01 | -0.22   | 1.7E-02 | -0.21   | n/a     |
| cortisol                           | HILIC-pos | Others                               | HMDB00063 | -0.51   | 3.6E-07 | -0.51   | 6.7E-07 | -0.52   | 3.1E-07 | -0.52   | 1.2E-06 | -0.52   | 8.7E-07 | -0.50   | 1.3E-06 | -0.42   | 1.5E-02 | -0.24   | 1.4E-02 | -0.26   | 8.7E-03 | -0.24   | 1.4E-02 | -0.25   | 1.8E-02 | -0.27   | 8.8E-03 | -0.19   | 6.2E-02 | -0.25   | 8.5E-03 |
| hydroxycoitine                     | HILIC-pos | Others                               | n/a       | -0.41   | 9.5E-05 | -0.45   | 2.3E-05 | -0.40   | 1.4E-04 | -0.40   | 2.1E-04 | -0.41   | 1.4E-04 | -0.43   | 6.3E-05 | -0.30   | 1.7E-01 | -0.26   | 4.9E-03 | -0.35   | 2.3E-04 | -0.28   | 2.9E-03 | -0.27   | 5.3E-03 | -0.24   | 1.3E-02 | -0.26   | 5.8E-03 | -0.25   | n/a     |
| piperine                           | HILIC-pos | Others                               | HMDB29377 | 0.58    | 6.8E-09 | 0.57    | 2.0E-08 | 0.56    | 1.3E-08 | 0.67    | 6.2E-11 | 0.66    | 2.1E-10 | 0.57    | 2.1E-08 | 0.85    | 1.7E-06 | 0.48    | 6.3E-08 | 0.47    | 2.8E-07 | 0.47    | 1.3E-07 | 0.51    | 8.2E-08 | 0.50    | 1.0E-07 | 0.48    | 1.7E-07 | 0.48    | 4.2E-08 |
| pseudouridine                      | HILIC-pos | Others                               | HMDB00767 | -0.43   | 1.1E-05 | -0.41   | 5.0E-05 | -0.44   | 6.8E-06 | -0.47   | 4.1E-06 | -0.47   | 3.6E-06 | -0.47   | 2.7E-06 | -0.38   | 3.9E-02 | -0.32   | 5.2E-04 | -0.28   | 3.6E-03 | -0.35   | 1.3E-04 | -0.34   | 4.5E-04 | -0.32   | 8.4E-04 | -0.34   | 3.7E-04 | -0.31   | 5.2E-04 |
| thiamine                           | HILIC-pos | Others                               | HMDB00235 | -0.35   | 5.8E-04 | -0.38   | 3.5E-04 | -0.33   | 1.4E-03 | -0.36   | 7.5E-04 | -0.36   | 6.1E-04 | -0.38   | 2.8E-04 | -0.41   | 3.7E-02 | -0.42   | 4.2E-06 | -0.42   | 9.7E-06 | -0.39   | 1.8E-05 | -0.36   | 1.9E-04 | -0.40   | 3.7E-05 | -0.45   | 2.2E-06 | -0.42   | 2.9E-06 |
| trigonelline                       | HILIC-pos | Others                               | HMDB00875 | -0.58   | 1.8E-08 | -0.59   | 2.5E-08 | -0.58   | 1.9E-08 | -0.54   | 5.3E-07 | -0.53   | 7.8E-07 | -0.59   | 1.6E-08 | -0.60   | 1.6E-03 | -0.50   | 5.9E-08 | -0.53   | 1.8E-08 | -0.49   | 8.9E-08 | -0.45   | 4.9E-06 | -0.47   | 9.9E-07 | -0.50   | 9.1E-08 | -0.50   | 3.4E-08 |

Model 1 (fully adjusted model): adjusted for coronary heart disease case-control status, matching factors (age, hysterectomy status, and enrollment window), hormone therapy use status, body mass index, smoking status, alcohol consumption, education, family income, physical activity, baseline health conditions (diabetes, hypertension, and depression), and medication use (aspirin, lipid-lowering, antihyperglycemic, antihypertensive, and antidepressants).

Model 2 (lipid-adjusted model): Model 1 + plasma levels of total cholesterol and high-density lipoprotein cholesterol.

Model 3 (diet quality-adjusted model): Model 1 + Healthy Eating Index-2005.

Model 4 (macronutrient-adjusted model): Model 1 + dietary intake of proteins, total carbohydrates, and total fat.

Model 5 (calorie-adjusted model): Model 1 + total calorie intake.

Model 6 (psychological factor-adjusted model): Model 1 + 8 psychological indicators, including emotional well-being, hostility, general health, optimism, social support, social functioning, social strain, and sleep disturbance.

Model 7 (glucose-adjusted model): Model 1 + blood glucose levels.

Supplementary Table S4. Regression coefficients of metabolome-wide association analyses in WHI and MESA.

| Metabolite name | Method | Category                         | HMDB ID    | WHI-OS        |         |         |         | WHI-HT        |         |         |         | MESA          |       |         |       |
|-----------------|--------|----------------------------------|------------|---------------|---------|---------|---------|---------------|---------|---------|---------|---------------|-------|---------|-------|
|                 |        |                                  |            | Model 1       |         | Model 2 |         | Model 1       |         | Model 2 |         | Model 1       |       | Model 2 |       |
|                 |        |                                  |            | Beta          | FDR     | Beta    | FDR     | Beta          | FDR     | Beta    | FDR     | Beta          | Raw-p | Beta    | Raw-p |
| C30:0 DAG       | C8-pos | Glycerolipids - Diacylglycerols  | HMDB07011* | -0.467        | 8.7E-07 | -0.320  | 2.9E-04 | -0.591        | 4.8E-11 | -0.318  | 8.6E-05 |               |       |         |       |
| C32:0 DAG       | C8-pos | Glycerolipids - Diacylglycerols  | HMDB07098* | -0.603        | 3.5E-09 | -0.402  | 1.5E-05 | -0.587        | 7.8E-12 | -0.306  | 4.1E-05 | -0.234        | 0.677 | -0.210  | 0.703 |
| C32:1 DAG       | C8-pos | Glycerolipids - Diacylglycerols  | HMDB07099* | -0.872        | 7.8E-18 | -0.653  | 1.5E-13 | -0.864        | 1.0E-22 | -0.548  | 5.5E-14 | -0.562        | 0.302 | -0.483  | 0.357 |
| C32:2 DAG       | C8-pos | Glycerolipids - Diacylglycerols  | HMDB07128* | -0.756        | 3.4E-15 | -0.541  | 2.8E-11 | -0.886        | 5.8E-22 | -0.557  | 4.6E-13 |               |       |         |       |
| C34:0 DAG       | C8-pos | Glycerolipids - Diacylglycerols  | HMDB07100* | -0.593        | 1.4E-07 | -0.427  | 5.3E-05 | -0.427        | 1.6E-07 | -0.238  | 2.2E-03 | -0.618        | 0.290 | -0.507  | 0.376 |
| C34:1 DAG       | C8-pos | Glycerolipids - Diacylglycerols  | HMDB07102* | -0.655        | 3.2E-11 | -0.422  | 5.6E-07 | -0.663        | 3.6E-14 | -0.330  | 2.8E-06 | -0.365        | 0.493 | -0.280  | 0.578 |
| C34:2 DAG       | C8-pos | Glycerolipids - Diacylglycerols  | HMDB07103* | -0.832        | 1.0E-16 | -0.584  | 2.4E-12 | -0.856        | 1.3E-22 | -0.499  | 1.3E-13 | -0.496        | 0.342 | -0.383  | 0.436 |
| C34:3 DAG       | C8-pos | Glycerolipids - Diacylglycerols  | HMDB07132* | -0.948        | 3.9E-21 | -0.710  | 1.9E-17 | -0.975        | 2.2E-27 | -0.618  | 2.5E-18 | -0.783        | 0.127 | -0.572  | 0.224 |
| C36:1 DAG       | C8-pos | Glycerolipids - Diacylglycerols  | HMDB07216* | -0.504        | 1.9E-07 | -0.283  | 8.8E-04 | -0.556        | 7.4E-10 | -0.238  | 1.6E-03 | -0.435        | 0.399 | -0.378  | 0.432 |
| C36:2 DAG       | C8-pos | Glycerolipids - Diacylglycerols  | HMDB07218* | -0.845        | 2.8E-17 | -0.583  | 2.5E-12 | -0.821        | 6.3E-20 | -0.485  | 2.0E-11 | -0.435        | 0.386 | -0.364  | 0.437 |
| C36:3 DAG       | C8-pos | Glycerolipids - Diacylglycerols  | HMDB07219* | -0.788        | 8.9E-15 | -0.522  | 1.1E-09 | -0.783        | 4.7E-18 | -0.451  | 1.2E-09 | -0.617        | 0.198 | -0.493  | 0.266 |
| C36:4 DAG-A     | C8-pos | Glycerolipids - Diacylglycerols  | HMDB07248* | -0.590        | 4.2E-09 | -0.361  | 5.3E-05 | -0.611        | 2.7E-11 | -0.313  | 1.2E-04 |               |       |         |       |
| C36:4 DAG-B     | C8-pos | Glycerolipids - Diacylglycerols  | HMDB07248* | -0.331        | 1.1E-03 | -0.138  | 1.5E-01 | -0.429        | 1.2E-06 | -0.123  | n/a     |               |       |         |       |
| C38:3 DAG       | C8-pos | Glycerolipids - Diacylglycerols  | HMDB07168* | -0.717        | 2.1E-13 | -0.500  | 1.2E-08 | -0.683        | 6.3E-14 | -0.373  | 1.3E-06 |               |       |         |       |
| C42:0 TAG       | C8-pos | Glycerolipids - Triacylglycerols | HMDB42061* | -0.481        | 5.3E-07 | -0.342  | 2.6E-04 | -0.537        | 4.5E-08 | -0.337  | 3.2E-04 | -0.337        | 0.543 | -0.342  | 0.535 |
| C43:0 TAG       | C8-pos | Glycerolipids - Triacylglycerols | HMDB42062* | -0.305        | 6.2E-04 | -0.204  | 2.2E-02 | -0.489        | 1.4E-06 | -0.317  | 1.3E-03 | -0.009        | 0.988 | 0.064   | 0.916 |
| C43:1 TAG       | C8-pos | Glycerolipids - Triacylglycerols | HMDB42098* | -0.589        | 1.6E-09 | -0.446  | 2.6E-06 | -0.485        | 1.2E-07 | -0.292  | 7.8E-04 | -0.554        | 0.352 | -0.542  | 0.356 |
| C44:0 TAG       | C8-pos | Glycerolipids - Triacylglycerols | HMDB42063* | -0.510        | 2.5E-07 | -0.361  | 1.6E-04 | -0.544        | 9.1E-09 | -0.340  | 1.5E-04 | -0.601        | 0.285 | -0.627  | 0.264 |
| C44:1 TAG       | C8-pos | Glycerolipids - Triacylglycerols | HMDB42301* | -0.734        | 1.2E-12 | -0.559  | 1.1E-08 | -0.650        | 1.2E-12 | -0.436  | 2.8E-07 | -0.615        | 0.266 | -0.646  | 0.239 |
| C44:2 TAG       | C8-pos | Glycerolipids - Triacylglycerols | HMDB47770* | -0.716        | 2.7E-12 | -0.532  | 3.5E-08 | -0.636        | 6.3E-12 | -0.410  | 1.4E-06 | -0.476        | 0.400 | -0.452  | 0.413 |
| C45:0 TAG       | C8-pos | Glycerolipids - Triacylglycerols | HMDB42093* | -0.213        | 2.9E-02 | -0.159  | 1.1E-01 | -0.398        | 5.5E-05 | -0.252  | n/a     | -0.181        | 0.757 | -0.057  | 0.923 |
| C45:1 TAG       | C8-pos | Glycerolipids - Triacylglycerols | HMDB42099* | -0.764        | 1.2E-13 | -0.605  | 8.2E-10 | -0.630        | 8.2E-12 | -0.434  | 6.0E-07 | -0.405        | 0.484 | -0.430  | 0.458 |
| C45:2 TAG       | C8-pos | Glycerolipids - Triacylglycerols | HMDB43170* | -0.815        | 7.2E-15 | -0.638  | 1.6E-10 | -0.626        | 4.9E-12 | -0.422  | 4.9E-07 | -0.269        | 0.643 | -0.303  | 0.599 |
| C45:3 TAG       | C8-pos | Glycerolipids - Triacylglycerols | n/a        | -0.496        | 1.1E-07 | -0.324  | 2.9E-04 | -0.496        | 1.1E-07 | -0.297  | 6.3E-04 | -0.469        | 0.409 | -0.537  | 0.338 |
| C46:0 TAG       | C8-pos | Glycerolipids - Triacylglycerols | HMDB10411* | -0.463        | 4.6E-06 | -0.337  | 7.1E-04 | -0.524        | 1.0E-08 | -0.340  | 1.1E-04 | -0.671        | 0.248 | -0.694  | 0.234 |
| C46:1 TAG       | C8-pos | Glycerolipids - Triacylglycerols | HMDB10412* | -0.759        | 2.0E-13 | -0.584  | 2.0E-09 | -0.689        | 1.5E-14 | -0.471  | 1.1E-08 | -0.718        | 0.202 | -0.742  | 0.186 |
| C46:2 TAG       | C8-pos | Glycerolipids - Triacylglycerols | HMDB10419* | -0.858        | 1.4E-16 | -0.659  | 5.5E-12 | -0.768        | 2.2E-17 | -0.525  | 9.6E-11 | -0.538        | 0.335 | -0.518  | 0.343 |
| C46:3 TAG       | C8-pos | Glycerolipids - Triacylglycerols | HMDB42541* | -0.816        | 3.4E-15 | -0.602  | 2.1E-10 | -0.729        | 1.2E-15 | -0.476  | 3.4E-09 | -0.702        | 0.195 | -0.677  | 0.196 |
| C46:4 TAG       | C8-pos | Glycerolipids - Triacylglycerols | HMDB42781* | -0.694        | 6.9E-12 | -0.491  | 1.8E-07 | -0.596        | 1.9E-10 | -0.366  | 1.8E-05 | -0.807        | 0.142 | -0.799  | 0.134 |
| C47:1 TAG       | C8-pos | Glycerolipids - Triacylglycerols | HMDB42100* | -0.751        | 2.0E-13 | -0.605  | 8.0E-10 | -0.747        | 4.5E-16 | -0.548  | 2.7E-10 | -0.309        | 0.596 | -0.241  | 0.677 |
| C47:2 TAG       | C8-pos | Glycerolipids - Triacylglycerols | HMDB48435* | -0.920        | 6.4E-19 | -0.735  | 4.2E-14 | -0.847        | 1.7E-20 | -0.622  | 6.8E-14 | -0.202        | 0.731 | -0.196  | 0.737 |
| C48:0 TAG       | C8-pos | Glycerolipids - Triacylglycerols | HMDB05356* | -0.401        | 9.2E-05 | -0.273  | 6.8E-03 | -0.431        | 9.4E-07 | -0.246  | 3.4E-03 | 0.138         | 0.815 | 0.167   | 0.777 |
| C48:1 TAG       | C8-pos | Glycerolipids - Triacylglycerols | HMDB05359* | -0.742        | 2.9E-13 | -0.578  | 1.2E-09 | -0.750        | 2.4E-17 | -0.509  | 2.7E-10 | -0.571        | 0.328 | -0.519  | 0.367 |
| C48:2 TAG       | C8-pos | Glycerolipids - Triacylglycerols | HMDB05376* | -0.911        | 1.7E-18 | -0.707  | 1.2E-13 | -0.857        | 2.7E-22 | -0.607  | 7.5E-15 | -0.533        | 0.349 | -0.500  | 0.367 |
| C48:3 TAG       | C8-pos | Glycerolipids - Triacylglycerols | HMDB05432* | -1.025        | 7.5E-23 | -0.792  | 1.1E-17 | -0.917        | 1.2E-24 | -0.646  | 3.9E-17 | -0.659        | 0.222 | -0.638  | 0.222 |
| C48:4 TAG       | C8-pos | Glycerolipids - Triacylglycerols | HMDB42631* | -0.898        | 6.2E-18 | -0.665  | 1.0E-12 | -0.806        | 1.1E-18 | -0.547  | 8.0E-12 | -0.773        | 0.141 | -0.741  | 0.143 |
| C48:5 TAG       | C8-pos | Glycerolipids - Triacylglycerols | HMDB42841* | -0.720        | 2.1E-12 | -0.505  | 1.1E-07 | -0.631        | 1.3E-11 | -0.408  | 1.5E-06 | -0.788        | 0.137 | -0.791  | 0.124 |
| C49:1 TAG       | C8-pos | Glycerolipids - Triacylglycerols | HMDB11705* | -0.632        | 2.8E-10 | -0.508  | 2.1E-07 | -0.747        | 1.1E-15 | -0.552  | 5.4E-10 | -0.016        | 0.979 | 0.067   | 0.908 |
| C49:2 TAG       | C8-pos | Glycerolipids - Triacylglycerols | HMDB11706* | -0.976        | 1.1E-21 | -0.819  | 3.1E-17 | -0.986        | 2.8E-27 | -0.767  | 9.7E-20 | -0.008        | 0.989 | 0.110   | 0.842 |
| C49:3 TAG       | C8-pos | Glycerolipids - Triacylglycerols | HMDB42103* | <b>-1.098</b> | 2.3E-27 | -0.879  | 4.4E-22 | <b>-1.061</b> | 1.8E-31 | -0.805  | 2.0E-24 | <b>-0.221</b> | 0.681 | -0.179  | 0.733 |
| C50:0 TAG       | C8-pos | Glycerolipids - Triacylglycerols | HMDB05357* | -0.393        | 1.2E-04 | -0.220  | 2.5E-02 | -0.407        | 5.6E-06 | -0.176  | 3.1E-02 | -0.271        | 0.634 | -0.272  | 0.629 |
| C50:1 TAG       | C8-pos | Glycerolipids - Triacylglycerols | HMDB44109* | -0.609        | 1.1E-09 | -0.432  | 2.6E-06 | -0.621        | 5.2E-13 | -0.350  | 3.7E-06 | -0.486        | 0.392 | -0.420  | 0.446 |
| C50:2 TAG       | C8-pos | Glycerolipids - Triacylglycerols | HMDB05377* | -0.851        | 6.8E-17 | -0.670  | 4.4E-13 | -0.844        | 8.5E-23 | -0.560  | 3.5E-14 | -0.630        | 0.256 | -0.526  | 0.328 |
| C50:3 TAG       | C8-pos | Glycerolipids - Triacylglycerols | HMDB05433* | <b>-1.103</b> | 1.1E-26 | -0.858  | 5.4E-22 | <b>-1.046</b> | 1.1E-32 | -0.745  | 7.7E-25 | <b>-0.820</b> | 0.119 | -0.747  | 0.139 |
| C50:4 TAG       | C8-pos | Glycerolipids - Triacylglycerols | HMDB05435* | -1.012        | 1.7E-22 | -0.743  | 4.2E-17 | -0.945        | 5.0E-26 | -0.651  | 2.5E-18 | -0.734        | 0.144 | -0.695  | 0.145 |
| C50:5 TAG       | C8-pos | Glycerolipids - Triacylglycerols | HMDB10471* | -0.851        | 3.3E-16 | -0.597  | 8.3E-11 | -0.781        | 6.8E-18 | -0.521  | 4.6E-11 | -0.675        | 0.192 | -0.647  | 0.188 |
| C50:6 TAG       | C8-pos | Glycerolipids - Triacylglycerols | HMDB10497* | -0.639        | 7.8E-10 | -0.420  | 1.6E-05 | -0.529        | 9.4E-09 | -0.321  | 1.5E-04 | -0.652        | 0.227 | -0.676  | 0.198 |
| C51:0 TAG       | C8-pos | Glycerolipids - Triacylglycerols | HMDB31106* | -0.409        | 3.4E-05 | -0.242  | 1.1E-02 | -0.497        | 1.9E-07 | -0.247  | 4.2E-03 | 0.041         | 0.942 | -0.004  | 0.994 |
| C51:1 TAG       | C8-pos | Glycerolipids - Triacylglycerols | HMDB42104* | -0.580        | 1.7E-08 | -0.397  | 4.9E-05 | -0.598        | 2.4E-11 | -0.362  | 8.8E-06 | -0.048        | 0.933 | -0.015  | 0.979 |
| C51:2 TAG       | C8-pos | Glycerolipids - Triacylglycerols | HMDB49721* | -0.859        | 8.8E-17 | -0.674  | 2.9E-12 | -0.829        | 3.1E-20 | -0.601  | 3.2E-13 | -0.114        | 0.840 | -0.018  | 0.975 |
| C51:3 TAG       | C8-pos | Glycerolipids - Triacylglycerols | n/a        | <b>-0.969</b> | 6.9E-23 | -0.778  | 1.2E-18 | <b>-1.020</b> | 1.8E-29 | -0.730  | 1.9E-20 | <b>-0.170</b> | 0.738 | 0.035   | 0.942 |
| C52:1 TAG       | C8-pos | Glycerolipids - Triacylglycerols | HMDB05367* | -0.464        | 3.8E-06 | -0.237  | 9.0E-03 | -0.456        | 2.8E-07 | -0.176  | 2.0E-02 | -0.370        | 0.491 | -0.389  | 0.444 |
| C52:2 TAG       | C8-pos | Glycerolipids - Triacylglycerols | HMDB05369* | -0.717        | 1.7E-13 | -0.480  | 6.2E-09 | -0.778        | 6.3E-18 | -0.460  | 1.1E-09 | -0.578        | 0.271 | -0.471  | 0.344 |

| Metabolite name        | Method    | Category                                                    | HMDB ID     | WHI-OS  |         |         |         | WHI-HT  |         |         |         | MESA    |       |         |       |
|------------------------|-----------|-------------------------------------------------------------|-------------|---------|---------|---------|---------|---------|---------|---------|---------|---------|-------|---------|-------|
|                        |           |                                                             |             | Model 1 |         | Model 2 |         | Model 1 |         | Model 2 |         | Model 1 |       | Model 2 |       |
|                        |           |                                                             |             | Beta    | FDR     | Beta    | FDR     | Beta    | FDR     | Beta    | FDR     | Beta    | Raw-p | Beta    | Raw-p |
| C52:3 TAG              | C8-pos    | Glycerolipids - Triacylglycerols                            | HMDB05384*  | -0.645  | 1.5E-11 | -0.398  | 1.3E-06 | -0.810  | 5.3E-18 | -0.486  | 7.7E-10 | -0.779  | 0.128 | -0.629  | 0.191 |
| C52:4 TAG              | C8-pos    | Glycerolipids - Triacylglycerols                            | HMDB05363*  | -0.725  | 3.1E-13 | -0.510  | 1.1E-08 | -0.743  | 1.1E-15 | -0.449  | 4.1E-08 | -0.709  | 0.146 | -0.530  | 0.252 |
| C52:6 TAG              | C8-pos    | Glycerolipids - Triacylglycerols                            | HMDB05436*  | -0.725  | 2.4E-12 | -0.471  | 3.3E-07 | -0.663  | 3.5E-13 | -0.428  | 2.0E-07 | -0.585  | 0.255 | -0.598  | 0.225 |
| C52:7 TAG              | C8-pos    | Glycerolipids - Triacylglycerols                            | HMDB10517*  | -0.533  | 3.1E-07 | -0.324  | 1.1E-03 | -0.455  | 6.5E-07 | -0.277  | 1.2E-03 | -0.402  | 0.467 | -0.423  | 0.436 |
| C54:1 TAG              | C8-pos    | Glycerolipids - Triacylglycerols                            | HMDB05395*  | -0.371  | 1.8E-04 | -0.163  | 7.8E-02 | -0.382  | 2.8E-05 | -0.108  | n/a     | -0.293  | 0.574 | -0.273  | 0.583 |
| C54:2 TAG              | C8-pos    | Glycerolipids - Triacylglycerols                            | HMDB05403*  | -0.562  | 1.1E-08 | -0.311  | 2.4E-04 | -0.531  | 4.1E-09 | -0.218  | 3.2E-03 | -0.246  | 0.631 | -0.249  | 0.595 |
| C54:3 TAG              | C8-pos    | Glycerolipids - Triacylglycerols                            | HMDB05405*  | -0.720  | 1.1E-12 | -0.476  | 8.3E-08 | -0.695  | 5.2E-14 | -0.406  | 5.3E-07 | -0.111  | 0.828 | -0.067  | 0.891 |
| C54:4 TAG              | C8-pos    | Glycerolipids - Triacylglycerols                            | HMDB05370*  | -0.603  | 6.0E-09 | -0.432  | 1.4E-05 | -0.529  | 9.1E-09 | -0.323  | 2.7E-04 | -0.360  | 0.483 | -0.213  | 0.670 |
| C54:6 TAG              | C8-pos    | Glycerolipids - Triacylglycerols                            | HMDB05391*  | -0.411  | 5.9E-05 | -0.243  | 1.6E-02 | -0.398  | 2.9E-05 | -0.224  | 1.6E-02 | -0.425  | 0.434 | -0.441  | 0.414 |
| C54:7 TAG              | C8-pos    | Glycerolipids - Triacylglycerols                            | HMDB05447*  | -0.363  | 7.1E-04 | -0.152  | 1.5E-01 | -0.230  | 1.1E-02 | -0.074  | n/a     | 0.053   | 0.923 | -0.030  | 0.956 |
| C54:8 TAG              | C8-pos    | Glycerolipids - Triacylglycerols                            | HMDB10518*  | -0.326  | 1.9E-03 | -0.144  | 1.7E-01 | -0.239  | 9.7E-03 | -0.100  | n/a     | -0.041  | 0.940 | -0.114  | 0.834 |
| C55:2 TAG              | C8-pos    | Glycerolipids - Triacylglycerols                            | HMDB050319* | -0.657  | 1.2E-11 | -0.439  | 5.6E-07 | -0.651  | 4.1E-12 | -0.375  | 3.2E-06 | 0.183   | 0.732 | 0.088   | 0.864 |
| C55:3 TAG              | C8-pos    | Glycerolipids - Triacylglycerols                            | n/a         | -0.845  | 1.4E-16 | -0.660  | 1.2E-11 | -0.672  | 3.2E-13 | -0.478  | 4.3E-08 | 0.587   | 0.275 | 0.541   | 0.309 |
| C56:2 TAG              | C8-pos    | Glycerolipids - Triacylglycerols                            | HMDB05404*  | -0.529  | 2.5E-07 | -0.318  | 8.2E-04 | -0.525  | 1.5E-08 | -0.287  | 6.7E-04 | 0.095   | 0.858 | 0.012   | 0.982 |
| C56:3 TAG              | C8-pos    | Glycerolipids - Triacylglycerols                            | HMDB05410*  | -0.696  | 2.7E-12 | -0.488  | 8.9E-08 | -0.670  | 3.2E-13 | -0.392  | 1.2E-06 | -0.023  | 0.966 | -0.058  | 0.909 |
| C56:5 TAG              | C8-pos    | Glycerolipids - Triacylglycerols                            | HMDB05406*  | -0.561  | 5.9E-08 | -0.422  | 2.6E-05 | -0.429  | 3.1E-06 | -0.222  | 1.1E-02 | 0.232   | 0.679 | 0.226   | 0.688 |
| C56:8 TAG              | C8-pos    | Glycerolipids - Triacylglycerols                            | HMDB05392*  | 0.263   | 1.2E-02 | 0.370   | 3.6E-04 | 0.335   | 2.4E-04 | 0.411   | 6.9E-06 | 0.285   | 0.611 | 0.183   | 0.746 |
| C58:10 TAG             | C8-pos    | Glycerolipids - Triacylglycerols                            | HMDB05476*  | 0.579   | 7.6E-09 | 0.602   | 3.8E-09 | 0.651   | 2.1E-13 | 0.598   | 2.1E-11 | 0.204   | 0.715 | 0.073   | 0.896 |
| C58:11 TAG             | C8-pos    | Glycerolipids - Triacylglycerols                            | HMDB10531*  | 0.408   | 6.0E-05 | 0.453   | 1.1E-05 | 0.451   | 4.0E-07 | 0.413   | 3.9E-06 | 0.840   | 0.154 | 0.683   | 0.248 |
| C58:8 TAG              | C8-pos    | Glycerolipids - Triacylglycerols                            | HMDB05413*  | 0.525   | 8.8E-09 | 0.486   | 1.8E-07 | 0.699   | 1.8E-14 | 0.636   | 7.4E-12 | 0.511   | 0.349 | 0.413   | 0.452 |
| C58:9 TAG              | C8-pos    | Glycerolipids - Triacylglycerols                            | HMDB05463*  | 0.525   | 1.1E-07 | 0.508   | 4.6E-07 | 0.649   | 1.8E-13 | 0.583   | 6.8E-11 | 0.514   | 0.365 | 0.409   | 0.475 |
| C60:12 TAG             | C8-pos    | Glycerolipids - Triacylglycerols                            | HMDB05478*  | 0.576   | 9.4E-10 | 0.569   | 3.5E-09 | 0.771   | 2.8E-18 | 0.710   | 1.7E-15 | 0.476   | 0.392 | 0.404   | 0.472 |
| C16:1 LPC plasmalogen  | C8-pos    | Glycerophospholipids - Lysophosphatidylcholine plasmalogens | n/a         | 0.502   | 4.1E-07 | 0.543   | 5.5E-08 | 0.408   | 6.1E-06 | 0.325   | 3.2E-04 |         |       |         |       |
| C18:0 LPC plasmalogen  | C8-pos    | Glycerophospholipids - Lysophosphatidylcholine plasmalogens | HMDB11149*  | 0.398   | 5.9E-05 | 0.479   | 1.3E-06 | 0.270   | 3.4E-03 | 0.275   | 3.2E-03 |         |       |         |       |
| C14:0 LPC              | HILIC-pos | Glycerophospholipids - Lysophosphatidylcholines             | HMDB10379   | -0.882  | 1.8E-17 | -0.753  | 2.9E-13 | -0.784  | 6.3E-18 | -0.707  | 2.2E-15 | 0.208   | 0.708 | 0.153   | 0.784 |
| C14:0 LPC-A            | C8-pos    | Glycerophospholipids - Lysophosphatidylcholines             | HMDB10379*  | -0.819  | 4.8E-16 | -0.687  | 6.5E-12 | -0.856  | 1.7E-20 | -0.790  | 2.0E-18 | -0.060  | 0.918 | -0.146  | 0.803 |
| C14:0 LPC-B            | C8-pos    | Glycerophospholipids - Lysophosphatidylcholines             | HMDB10379*  | -0.695  | 1.2E-13 | -0.581  | 4.7E-10 | -0.618  | 1.6E-10 | -0.571  | 3.5E-09 |         |       |         |       |
| C15:0 LPC              | C8-pos    | Glycerophospholipids - Lysophosphatidylcholines             | HMDB10381   | -0.628  | 2.1E-10 | -0.515  | 1.9E-07 | -0.853  | 2.2E-21 | -0.822  | 5.9E-20 |         |       |         |       |
| C16:0 LPC              | C8-pos    | Glycerophospholipids - Lysophosphatidylcholines             | HMDB10382   | -0.351  | 1.6E-03 | -0.167  | 1.4E-01 | -0.400  | 6.4E-06 | -0.354  | n/a     | 0.374   | 0.497 | 0.179   | 0.734 |
| C16:1 LPC              | C8-pos    | Glycerophospholipids - Lysophosphatidylcholines             | HMDB10383   | -0.829  | 1.3E-15 | -0.734  | 2.2E-12 | -0.962  | 4.5E-27 | -0.959  | 1.4E-26 | -0.339  | 0.550 | -0.495  | 0.377 |
| C18:1 LPC              | C8-pos    | Glycerophospholipids - Lysophosphatidylcholines             | HMDB02815   | -0.225  | 3.4E-02 | -0.156  | 1.6E-01 | -0.320  | 2.4E-04 | -0.403  | n/a     | 0.366   | 0.525 | 0.193   | 0.733 |
| C18:2 LPC              | C8-pos    | Glycerophospholipids - Lysophosphatidylcholines             | HMDB10386*  | -0.223  | 4.0E-02 | -0.196  | 7.6E-02 | -0.283  | 9.3E-04 | -0.409  | n/a     | 0.700   | 0.208 | 0.515   | 0.351 |
| C18:3 LPC              | C8-pos    | Glycerophospholipids - Lysophosphatidylcholines             | HMDB10387*  | -0.355  | 6.2E-04 | -0.303  | 4.0E-03 | -0.531  | 6.7E-09 | -0.597  | 1.1E-10 | 0.377   | 0.494 | 0.175   | 0.739 |
| C20:3 LPC              | C8-pos    | Glycerophospholipids - Lysophosphatidylcholines             | HMDB10393*  | -0.424  | 8.3E-05 | -0.332  | 2.3E-03 | -0.493  | 1.1E-07 | -0.508  | 4.6E-08 |         |       |         |       |
| C20:4 LPC              | C8-pos    | Glycerophospholipids - Lysophosphatidylcholines             | HMDB10395   | 0.421   | 5.5E-05 | 0.480   | 4.3E-06 | 0.205   | 2.2E-02 | 0.112   | 2.1E-01 | 0.192   | 0.727 | 0.044   | 0.936 |
| C22:6 LPC              | C8-pos    | Glycerophospholipids - Lysophosphatidylcholines             | HMDB10404*  | 0.328   | 8.2E-04 | 0.358   | 3.2E-04 | 0.473   | 1.9E-07 | 0.413   | 6.9E-06 | 1.040   | 0.059 | 0.895   | 0.102 |
| C16:0 LPE              | C8-pos    | Glycerophospholipids - Lysophosphatidylethanolamines        | HMDB11503   | -0.491  | 1.1E-06 | -0.413  | 5.5E-05 | -0.513  | 3.3E-08 | -0.496  | 1.1E-07 | 0.243   | 0.664 | 0.088   | 0.874 |
| C18:0 LPE              | C8-pos    | Glycerophospholipids - Lysophosphatidylethanolamines        | HMDB11130*  | -0.317  | 3.0E-03 | -0.186  | 8.6E-02 | -0.402  | 1.9E-05 | -0.373  | n/a     | 0.234   | 0.676 | 0.038   | 0.944 |
| C18:1 LPE              | C8-pos    | Glycerophospholipids - Lysophosphatidylethanolamines        | HMDB11506   | -0.432  | 3.3E-05 | -0.360  | 6.7E-04 | -0.530  | 3.2E-08 | -0.548  | 1.7E-08 | -0.186  | 0.740 | -0.291  | 0.606 |
| C18:2 LPE              | C8-pos    | Glycerophospholipids - Lysophosphatidylethanolamines        | HMDB11507*  | -0.787  | 3.5E-14 | -0.716  | 1.0E-11 | -0.894  | 8.7E-23 | -0.901  | 8.1E-23 | 0.012   | 0.983 | -0.096  | 0.859 |
| C20:1 LPE              | C8-pos    | Glycerophospholipids - Lysophosphatidylethanolamines        | HMDB11512*  | -0.481  | 4.1E-07 | -0.429  | 8.5E-06 | -0.488  | 2.2E-07 | -0.546  | 9.7E-09 |         |       |         |       |
| C20:4 LPE              | HILIC-pos | Glycerophospholipids - Lysophosphatidylethanolamines        | HMDB11517   | -0.380  | 4.8E-04 | -0.300  | 6.2E-03 | -0.401  | 1.3E-05 | -0.446  | 1.7E-06 | -0.197  | 0.735 | -0.370  | 0.525 |
| C20:4 LPE-A            | C8-pos    | Glycerophospholipids - Lysophosphatidylethanolamines        | HMDB11517   | -0.264  | 1.7E-02 | -0.188  | 9.6E-02 | -0.475  | 2.8E-07 | -0.522  | n/a     | -0.320  | 0.586 | -0.472  | 0.422 |
| C32:1 PC plasmalogen-A | C8-pos    | Glycerophospholipids - Phosphatidylcholine plasmalogens     | HMDB13404*  | -0.493  | 5.5E-07 | -0.521  | 5.0E-08 | -0.500  | 5.3E-08 | -0.628  | 2.1E-12 |         |       |         |       |
| C32:1 PC plasmalogen-B | C8-pos    | Glycerophospholipids - Phosphatidylcholine plasmalogens     | HMDB13404*  | 0.330   | 1.2E-03 | 0.316   | 9.2E-04 | 0.403   | 1.3E-05 | 0.237   | 5.4E-03 |         |       |         |       |
| C34:1 PC plasmalogen   | C8-pos    | Glycerophospholipids - Phosphatidylcholine plasmalogens     | HMDB11208*  | -0.285  | 8.1E-03 | -0.273  | 7.0E-03 | -0.223  | 1.6E-02 | -0.353  | 5.0E-05 | -0.017  | 0.978 | -0.572  | 0.294 |
| C34:2 PC plasmalogen-B | C8-pos    | Glycerophospholipids - Phosphatidylcholine plasmalogens     | HMDB11210*  | 0.225   | 2.6E-02 | 0.170   | 4.8E-02 | 0.373   | 2.6E-05 | 0.139   | 6.3E-02 |         |       |         |       |
| C34:3 PC plasmalogen   | C8-pos    | Glycerophospholipids - Phosphatidylcholine plasmalogens     | HMDB11211*  | 0.314   | 1.9E-03 | 0.284   | 1.3E-03 | 0.487   | 1.3E-07 | 0.273   | 8.3E-04 | 0.501   | 0.411 | 0.015   | 0.978 |
| C34:4 PC plasmalogen   | C8-pos    | Glycerophospholipids - Phosphatidylcholine plasmalogens     | HMDB11212*  | -0.373  | 5.4E-05 | -0.464  | 2.7E-07 | -0.388  | 1.1E-04 | -0.499  | 9.5E-07 | 0.074   | 0.892 | -0.143  | 0.791 |
| C36:2 PC plasmalogen-B | C8-pos    | Glycerophospholipids - Phosphatidylcholine plasmalogens     | HMDB11243*  | 0.502   | 1.0E-06 | 0.412   | 3.6E-06 | 0.586   | 7.7E-12 | 0.356   | 1.3E-06 |         |       |         |       |
| C36:3 PC plasmalogen-B | C8-pos    | Glycerophospholipids - Phosphatidylcholine plasmalogens     | HMDB11244*  | 0.350   | 7.0E-04 | 0.308   | 8.0E-04 | 0.466   | 2.5E-07 | 0.254   | 1.4E-03 |         |       |         |       |
| C36:4 PC plasmalogen-B | C8-pos    | Glycerophospholipids - Phosphatidylcholine plasmalogens     | HMDB11310*  | 0.271   | 1.2E-02 | 0.339   | 8.7E-04 | 0.334   | 4.9E-04 | 0.223   | 1.0E-02 |         |       |         |       |
| C36:5 PC plasmalogen-A | C8-pos    | Glycerophospholipids - Phosphatidylcholine plasmalogens     | HMDB11221*  | 0.243   | 1.7E-02 | 0.282   | 5.0E-03 | 0.240   | 1.1E-02 | 0.136   | 1.2E-01 | 0.934   | 0.120 | 0.609   | 0.297 |
| C36:5 PC plasmalogen-B | C8-pos    | Glycerophospholipids - Phosphatidylcholine plasmalogens     | HMDB11220*  | 0.583   | 1.6E-08 | 0.608   | 5.9E-10 | 0.690   | 2.0E-13 | 0.527   | 6.3E-10 | 0.062   | 0.920 | -0.395  | 0.493 |

| Metabolite name        | Method        | Category                                                     | HMDB ID           | WHI-OS        |                | WHI-HT        |                | MESA          |                |               |                |               |              |               |              |
|------------------------|---------------|--------------------------------------------------------------|-------------------|---------------|----------------|---------------|----------------|---------------|----------------|---------------|----------------|---------------|--------------|---------------|--------------|
|                        |               |                                                              |                   | Model 1       |                | Model 2       |                | Model 1       |                | Model 2       |                | Model 1       | Model 2      |               |              |
|                        |               |                                                              |                   | Beta          | FDR            | Beta          | FDR            | Beta          | FDR            | Beta          | FDR            | Beta          | Raw-p        | Beta          | Raw-p        |
| C38:4 PC plasmalogen-A | C8-pos        | Glycerophospholipids - Phosphatidylcholine plasmalogens      | HMDB11252*        | -0.240        | 3.1E-02        | -0.134        | 2.3E-01        | -0.254        | 7.0E-03        | -0.289        | n/a            |               |              |               |              |
| C38:4 PC plasmalogen-B | C8-pos        | Glycerophospholipids - Phosphatidylcholine plasmalogens      | HMDB11252*        | 0.341         | 1.7E-03        | 0.414         | 5.5E-05        | 0.382         | 4.2E-05        | 0.298         | 5.6E-04        |               |              |               |              |
| C38:6 PC plasmalogen-A | C8-pos        | Glycerophospholipids - Phosphatidylcholine plasmalogens      | HMDB11319*        | 0.578         | 3.2E-08        | 0.643         | 7.3E-10        | 0.687         | 3.8E-14        | 0.615         | 8.5E-13        |               |              |               |              |
| C38:6 PC plasmalogen-B | C8-pos        | Glycerophospholipids - Phosphatidylcholine plasmalogens      | HMDB11319*        | 0.454         | 1.3E-05        | 0.469         | 1.3E-06        | 0.516         | 4.5E-08        | 0.334         | 7.2E-05        |               |              |               |              |
| C38:7 PC plasmalogen   | C8-pos        | Glycerophospholipids - Phosphatidylcholine plasmalogens      | HMDB11229*        | 0.621         | 1.9E-10        | 0.633         | 3.9E-11        | 0.910         | 1.4E-23        | 0.775         | 5.3E-20        | 0.393         | 0.474        | 0.011         | 0.983        |
| C40:11 PC plasmalogen  | C8-pos        | Glycerophospholipids - Phosphatidylcholine plasmalogens      | n/a               | -0.776        | 5.8E-14        | -0.738        | 2.7E-12        | -0.823        | 2.3E-19        | -0.833        | 1.6E-19        |               |              |               |              |
| C40:7 PC plasmalogen   | C8-pos        | Glycerophospholipids - Phosphatidylcholine plasmalogens      | HMDB11294*        | 0.494         | 1.5E-06        | 0.527         | 6.8E-08        | 0.659         | 2.6E-12        | 0.529         | 8.8E-10        | 0.140         | 0.813        | -0.383        | 0.465        |
| C28:0 PC               | C8-pos        | Glycerophospholipids - Phosphatidylcholines                  | HMDB07866*        | -0.700        | 5.5E-14        | -0.641        | 1.3E-11        | -0.598        | 7.4E-10        | -0.572        | 2.1E-09        |               |              |               |              |
| C30:0 PC               | C8-pos        | Glycerophospholipids - Phosphatidylcholines                  | HMDB07869*        | -0.791        | 1.3E-15        | -0.695        | 2.2E-12        | -0.678        | 1.1E-14        | -0.667        | 1.9E-15        | -0.256        | 0.688        | -0.427        | 0.506        |
| C30:1 PC               | C8-pos        | Glycerophospholipids - Phosphatidylcholines                  | HMDB07870*        | -0.983        | 4.2E-24        | -0.917        | 6.7E-21        | -0.912        | 1.1E-24        | -0.890        | 1.6E-24        | -0.645        | 0.296        | -0.816        | 0.188        |
| C31:1 PC               | C8-pos        | Glycerophospholipids - Phosphatidylcholines                  | HMDB07936*        | <b>-1.064</b> | 1.2E-28        | -1.009        | 1.4E-25        | <b>-1.087</b> | 2.1E-33        | -1.065        | 1.4E-33        |               |              |               |              |
| C32:0 PC               | C8-pos        | Glycerophospholipids - Phosphatidylcholines                  | HMDB07871*        | -0.462        | 5.3E-06        | -0.329        | 7.7E-04        | -0.375        | 3.3E-05        | -0.402        | 9.5E-07        | -0.051        | 0.936        | -0.531        | 0.363        |
| C32:1 PC               | C8-pos        | Glycerophospholipids - Phosphatidylcholines                  | HMDB07873*        | -1.002        | 1.1E-23        | -0.921        | 3.6E-20        | -0.916        | 2.2E-27        | -0.876        | 8.4E-27        | -0.542        | 0.351        | -0.806        | 0.160        |
| C32:2 PC               | C8-pos        | Glycerophospholipids - Phosphatidylcholines                  | HMDB07874*        | <b>-1.137</b> | 1.2E-28        | -1.011        | 1.9E-24        | <b>-1.050</b> | 2.6E-35        | -1.025        | 8.1E-40        | <b>-0.273</b> | 0.635        | -0.538        | 0.340        |
| C34:1 PC               | C8-pos        | Glycerophospholipids - Phosphatidylcholines                  | HMDB07972*        | -0.691        | 8.2E-12        | -0.556        | 1.4E-08        | -0.526        | 4.3E-09        | -0.496        | 1.8E-09        | -0.172        | 0.769        | -0.566        | 0.302        |
| C34:2 PC               | C8-pos        | Glycerophospholipids - Phosphatidylcholines                  | HMDB07973*        | -0.857        | 1.1E-17        | -0.716        | 2.7E-14        | -0.734        | 4.3E-16        | -0.728        | 8.1E-20        | -0.084        | 0.875        | -0.623        | 0.164        |
| C34:3 PC               | C8-pos        | Glycerophospholipids - Phosphatidylcholines                  | HMDB08006*        | <b>-1.116</b> | 2.3E-27        | -0.969        | 1.0E-23        | <b>-1.034</b> | 1.2E-32        | -1.012        | 3.2E-40        | <b>-0.734</b> | 0.185        | -1.152        | 0.025        |
| C34:4 PC               | C8-pos        | Glycerophospholipids - Phosphatidylcholines                  | HMDB07883*        | -0.657        | 1.5E-11        | -0.554        | 6.2E-09        | -0.818        | 4.0E-20        | -0.843        | 5.3E-23        | -0.418        | 0.493        | -0.641        | 0.291        |
| C34:5 PC               | C8-pos        | Glycerophospholipids - Phosphatidylcholines                  | HMDB07885*        | -0.411        | 2.2E-05        | -0.323        | 8.0E-04        | -0.444        | 1.2E-06        | -0.480        | 5.0E-08        |               |              |               |              |
| C36:1 PC               | C8-pos        | Glycerophospholipids - Phosphatidylcholines                  | HMDB08038*        | -0.431        | 5.5E-05        | -0.290        | 5.4E-03        | -0.327        | 5.7E-04        | -0.302        | 6.0E-04        | -0.004        | 0.995        | -0.375        | 0.501        |
| C36:2 PC               | C8-pos        | Glycerophospholipids - Phosphatidylcholines                  | HMDB08039*        | -0.666        | 1.1E-10        | -0.508        | 1.1E-07        | -0.557        | 4.5E-09        | -0.559        | 4.3E-11        | -0.193        | 0.739        | -0.737        | 0.142        |
| C36:3 PC               | C8-pos        | Glycerophospholipids - Phosphatidylcholines                  | HMDB08105*        | -0.844        | 9.4E-16        | -0.696        | 2.4E-12        | -0.821        | 3.4E-20        | -0.821        | 1.1E-24        | -0.644        | 0.246        | -1.045        | 0.042        |
| C36:4 PC-A             | C8-pos        | Glycerophospholipids - Phosphatidylcholines                  | HMDB07983*        | -0.754        | 6.6E-12        | -0.656        | 1.0E-09        | -0.267        | 2.3E-03        | -0.321        | 9.9E-05        | -0.326        | 0.544        | -0.719        | 0.151        |
| C36:5 PC               | C8-pos        | Glycerophospholipids - Phosphatidylcholines                  | HMDB07890*        | -0.282        | 7.8E-03        | -0.173        | 1.0E-01        | -0.351        | 4.0E-05        | -0.393        | n/a            |               |              |               |              |
| C37:1 PC               | C8-pos        | Glycerophospholipids - Phosphatidylcholines                  | HMDB07952*        | -0.395        | 1.4E-04        | -0.267        | 7.9E-03        | -0.262        | 5.4E-03        | -0.284        | 1.1E-03        |               |              |               |              |
| C38:2 PC               | C8-pos        | Glycerophospholipids - Phosphatidylcholines                  | HMDB08270*        | -0.394        | 1.9E-04        | -0.235        | 2.1E-02        | -0.238        | 1.2E-02        | -0.196        | 2.1E-02        | 0.107         | 0.856        | -0.353        | 0.504        |
| C38:3 PC               | C8-pos        | Glycerophospholipids - Phosphatidylcholines                  | HMDB08047*        | -0.496        | 2.5E-06        | -0.295        | 3.5E-03        | -0.480        | 3.0E-07        | -0.358        | 2.6E-05        | -0.171        | 0.752        | -0.456        | 0.363        |
| C40:1 PC               | C8-pos        | Glycerophospholipids - Phosphatidylcholines                  | HMDB08026*        | -0.209        | 3.6E-02        | -0.133        | 1.9E-01        | -0.212        | 2.7E-02        | -0.278        | n/a            |               |              |               |              |
| C40:6 PC-A             | C8-pos        | Glycerophospholipids - Phosphatidylcholines                  | HMDB08057*        | -0.408        | 1.3E-04        | -0.212        | 4.1E-02        | -0.385        | 4.2E-05        | -0.276        | 1.4E-03        |               |              |               |              |
| C40:6 PC-B             | C8-pos        | Glycerophospholipids - Phosphatidylcholines                  | HMDB08057*        | 0.287         | 3.8E-03        | 0.408         | 2.3E-05        | 0.584         | 2.5E-10        | 0.613         | 6.3E-12        |               |              |               |              |
| C34:2 PE plasmalogen   | C8-pos        | Glycerophospholipids - Phosphatidylethanolamine plasmalogens | HMDB08952*        | 0.301         | 4.7E-03        | 0.337         | 1.2E-03        | 0.451         | 3.4E-06        | 0.319         | 5.2E-04        | 0.982         | 0.094        | 0.578         | 0.294        |
| C34:3 PE plasmalogen   | C8-pos        | Glycerophospholipids - Phosphatidylethanolamine plasmalogens | HMDB11343*        | 0.233         | 3.2E-02        | 0.254         | 2.0E-02        | 0.332         | 5.1E-04        | 0.219         | 1.8E-02        | 0.456         | 0.437        | 0.142         | 0.803        |
| C36:2 PE plasmalogen   | C8-pos        | Glycerophospholipids - Phosphatidylethanolamine plasmalogens | HMDB09082*        | 0.307         | 3.6E-03        | 0.343         | 8.8E-04        | 0.443         | 4.0E-06        | 0.332         | 3.0E-04        | 0.542         | 0.368        | 0.180         | 0.756        |
| C36:5 PE plasmalogen   | C8-pos        | Glycerophospholipids - Phosphatidylethanolamine plasmalogens | HMDB11410*        | 0.752         | 3.0E-12        | 0.796         | 5.4E-13        | 0.824         | 1.0E-19        | 0.736         | 1.0E-16        | 0.620         | 0.298        | 0.308         | 0.596        |
| C38:5 PE plasmalogen   | C8-pos        | Glycerophospholipids - Phosphatidylethanolamine plasmalogens | HMDB11386*        | 0.638         | 1.4E-09        | 0.678         | 1.5E-10        | 0.746         | 9.4E-16        | 0.642         | 6.0E-13        | 0.501         | 0.414        | 0.153         | 0.798        |
| C38:6 PE plasmalogen   | C8-pos        | Glycerophospholipids - Phosphatidylethanolamine plasmalogens | HMDB11387*        | 0.702         | 1.7E-11        | 0.740         | 1.9E-12        | 0.766         | 1.6E-16        | 0.623         | 6.7E-13        | 0.499         | 0.402        | 0.074         | 0.894        |
| C38:7 PE plasmalogen   | C8-pos        | Glycerophospholipids - Phosphatidylethanolamine plasmalogens | HMDB11420*        | 0.656         | 2.2E-11        | 0.701         | 1.0E-12        | 0.986         | 1.8E-27        | 0.889         | 2.7E-25        | 0.973         | 0.067        | 0.607         | 0.228        |
| C40:7 PE plasmalogen   | C8-pos        | Glycerophospholipids - Phosphatidylethanolamine plasmalogens | HMDB11394*        | <b>0.766</b>  | 2.4E-14        | 0.797         | 1.4E-15        | <b>1.057</b>  | 6.4E-30        | 0.945         | 3.3E-27        | <b>0.640</b>  | 0.244        | 0.240         | 0.642        |
| C42:11 PE plasmalogen  | C8-pos        | Glycerophospholipids - Phosphatidylethanolamine plasmalogens | n/a               | -0.612        | 9.8E-09        | -0.630        | 7.2E-09        | -0.657        | 2.7E-13        | -0.633        | 6.2E-12        |               |              |               |              |
| C44:13 PE plasmalogen  | C8-pos        | Glycerophospholipids - Phosphatidylethanolamine plasmalogens | n/a               | 0.749         | 1.9E-12        | 0.729         | 2.5E-11        | 0.482         | 1.6E-08        | 0.437         | 5.6E-07        | -0.072        | 0.897        | -0.400        | 0.452        |
| C34:2 PE               | C8-pos        | Glycerophospholipids - Phosphatidylethanolamines             | HMDB08928*        | -0.744        | 1.6E-13        | -0.658        | 9.8E-11        | -0.608        | 6.5E-12        | -0.434        | 3.8E-07        | -0.897        | 0.109        | -0.850        | 0.129        |
| C36:0 PE               | C8-pos        | Glycerophospholipids - Phosphatidylethanolamines             | HMDB08991*        | -0.625        | 2.2E-09        | -0.513        | 4.6E-07        | -0.511        | 3.2E-08        | -0.541        | 3.8E-10        | 1.027         | 0.086        | 0.783         | 0.181        |
| C36:1 PE               | C8-pos        | Glycerophospholipids - Phosphatidylethanolamines             | HMDB08993*        | -0.425        | 1.9E-05        | -0.296        | 2.7E-03        | -0.362        | 9.4E-05        | -0.185        | 3.6E-02        | -0.681        | 0.227        | -0.752        | 0.181        |
| C36:2 PE               | C8-pos        | Glycerophospholipids - Phosphatidylethanolamines             | HMDB08994*        | -0.874        | 6.4E-18        | -0.743        | 1.2E-13        | -0.699        | 8.5E-15        | -0.519        | 1.0E-09        | -0.853        | 0.109        | -0.925        | 0.082        |
| <b>C36:3 PE</b>        | <b>C8-pos</b> | <b>Glycerophospholipids - Phosphatidylethanolamines</b>      | <b>HMDB09060*</b> | <b>-0.828</b> | <b>3.5E-16</b> | <b>-0.741</b> | <b>6.3E-13</b> | <b>-0.662</b> | <b>1.8E-13</b> | <b>-0.557</b> | <b>3.6E-10</b> | <b>-1.123</b> | <b>0.050</b> | <b>-1.176</b> | <b>0.042</b> |
| C38:2 PE               | C8-pos        | Glycerophospholipids - Phosphatidylethanolamines             | HMDB08942*        | -0.724        | 4.3E-12        | -0.624        | 2.1E-10        | -0.596        | 3.7E-11        | -0.667        | 7.7E-16        | 0.659         | 0.217        | 0.252         | 0.605        |
| C38:5 PE               | C8-pos        | Glycerophospholipids - Phosphatidylethanolamines             | HMDB09069*        | -0.361        | 4.5E-04        | -0.277        | 7.7E-03        | -0.292        | 1.3E-03        | -0.279        | 2.0E-03        | -0.941        | 0.129        | -1.090        | 0.078        |
| C40:6 PS               | C8-pos        | Glycerophospholipids - phosphatidylserine                    | HMDB10167*        | -0.843        | 8.9E-17        | -0.773        | 5.2E-14        | -0.949        | 1.5E-25        | -0.921        | 2.5E-24        | 0.241         | 0.672        | 0.147         | 0.798        |
| 4-cholesten-3-one      | C8-pos        | Sterol lipids - Cholesteryl                                  | HMDB00921         | -0.725        | 1.1E-15        | -0.501        | 6.9E-10        | -0.909        | 2.5E-20        | -0.748        | 2.6E-18        |               |              |               |              |
| C14:0 CE               | C8-pos        | Sterol lipids - Cholesteryl esters                           | HMDB06725         | -0.499        | 1.9E-07        | -0.436        | 6.4E-06        | -0.563        | 1.7E-09        | -0.591        | 2.4E-10        | 0.919         | 0.109        | 0.754         | 0.186        |
| C16:0 CE               | C8-pos        | Sterol lipids - Cholesteryl esters                           | HMDB00885         | 0.603         | 1.3E-10        | 0.616         | 2.4E-12        | 0.728         | 3.9E-14        | 0.517         | 1.2E-08        | 0.248         | 0.652        | -0.168        | 0.738        |
| C16:1 CE               | C8-pos        | Sterol lipids - Cholesteryl esters                           | HMDB00658*        | -0.680        | 2.0E-12        | -0.653        | 2.5E-11        | -0.583        | 1.0E-10        | -0.655        | 4.6E-13        | -0.151        | 0.769        | -0.410        | 0.416        |
| C18:0 CE               | C8-pos        | Sterol lipids - Cholesteryl esters                           | HMDB10368         | 0.210         | 4.4E-02        | 0.499         | 1.1E-09        | 0.283         | 2.2E-03        | 0.380         | 3.8E-07        | 0.671         | 0.254        | 0.237         | 0.613        |
| C18:1 CE               | C8-pos        | Sterol lipids - Cholesteryl esters                           | HMDB00918         | 0.480         | 2.5E-07        | 0.452         | 5.7E-08        | 0.611         | 7.3E-11        | 0.329         | 7.9E-05        | 0.322         | 0.559        | -0.114        | 0.814        |



| Metabolite name                      | Method           | Category                                  | HMDB ID          | WHI-OS        |                |               |                | WHI-HT        |                |               |                | MESA          |              |               |              |
|--------------------------------------|------------------|-------------------------------------------|------------------|---------------|----------------|---------------|----------------|---------------|----------------|---------------|----------------|---------------|--------------|---------------|--------------|
|                                      |                  |                                           |                  | Model 1       |                | Model 2       |                | Model 1       |                | Model 2       |                | Model 1       |              | Model 2       |              |
|                                      |                  |                                           |                  | Beta          | FDR            | Beta          | FDR            | Beta          | FDR            | Beta          | FDR            | Beta          | Raw-p        | Beta          | Raw-p        |
| C18:2 CE                             | C8-pos           | Sterol lipids - Cholesteryl esters        | HMDB00610*       | 0.539         | 1.3E-08        | 0.456         | 1.8E-07        | 0.538         | 9.4E-09        | 0.240         | 3.7E-03        | 0.179         | 0.747        | -0.140        | 0.786        |
| C20:1 CE                             | C8-pos           | Sterol lipids - Cholesteryl esters        | HMDB05193        | 0.234         | 2.5E-02        | 0.368         | 1.3E-04        | 0.627         | 4.4E-12        | 0.530         | 1.3E-10        |               |              |               |              |
| C20:2 CE                             | C8-pos           | Sterol lipids - Cholesteryl esters        | HMDB06734        | 0.502         | 1.6E-07        | 0.479         | 7.0E-08        | 0.794         | 1.8E-18        | 0.543         | 2.5E-11        |               |              |               |              |
| C20:3 CE                             | C8-pos           | Sterol lipids - Cholesteryl esters        | HMDB06736*       | 0.490         | 1.9E-06        | 0.484         | 6.9E-07        | 0.534         | 2.0E-08        | 0.301         | 6.2E-04        | 0.268         | 0.623        | 0.015         | 0.977        |
| C20:4 CE                             | C8-pos           | Sterol lipids - Cholesteryl esters        | HMDB06726        | <b>1.065</b>  | 6.9E-28        | 1.016         | 6.5E-29        | <b>1.121</b>  | 2.1E-33        | 0.851         | 7.7E-25        | <b>-0.121</b> | 0.819        | -0.387        | 0.444        |
| <b>C20:5 CE</b>                      | <b>C8-pos</b>    | <b>Sterol lipids - Cholesteryl esters</b> | <b>HMDB06731</b> | <b>0.469</b>  | <b>5.0E-06</b> | <b>0.530</b>  | <b>7.3E-08</b> | <b>0.403</b>  | <b>4.6E-06</b> | <b>0.235</b>  | <b>4.0E-03</b> | <b>1.145</b>  | <b>0.045</b> | <b>0.817</b>  | <b>0.137</b> |
| C22:4 CE                             | C8-pos           | Sterol lipids - Cholesteryl esters        | HMDB06729*       | <b>0.840</b>  | 1.4E-20        | 0.756         | 2.7E-19        | <b>1.072</b>  | 1.7E-30        | 0.782         | 2.4E-21        | <b>0.176</b>  | 0.740        | 0.027         | 0.958        |
| C22:5 CE                             | C8-pos           | Sterol lipids - Cholesteryl esters        | HMDB10375*       | 0.932         | 4.9E-19        | 0.906         | 2.7E-19        | 0.936         | 4.5E-27        | 0.739         | 1.6E-19        | 0.430         | 0.425        | 0.221         | 0.676        |
| C22:6 CE                             | C8-pos           | Sterol lipids - Cholesteryl esters        | HMDB06733        | <b>0.963</b>  | 1.5E-23        | 0.927         | 5.8E-23        | <b>1.241</b>  | 4.9E-44        | 1.055         | 4.1E-36        | <b>0.637</b>  | 0.239        | 0.419         | 0.428        |
| C16:0 Ceramide (d18:1)               | C8-pos           | Sphingolipids - Ceramides                 | HMDB04949        | -0.258        | 1.2E-02        | -0.031        | 7.6E-01        | -0.272        | 5.0E-03        | -0.144        | n/a            | 0.378         | 0.515        | 0.032         | 0.948        |
| C22:0 Ceramide (d18:1)               | C8-pos           | Sphingolipids - Ceramides                 | HMDB04952        | -0.277        | 6.7E-03        | -0.013        | 9.0E-01        | -0.376        | 8.1E-05        | -0.210        | n/a            | 0.845         | 0.096        | 0.559         | 0.193        |
| C23:0 Ceramide (d18:1)               | C8-pos           | Sphingolipids - Ceramides                 | HMDB00950        | -0.363        | 3.4E-04        | -0.098        | 3.0E-01        | -0.495        | 1.8E-07        | -0.353        | n/a            |               |              |               |              |
| C24:0 Ceramide (d18:1)               | C8-pos           | Sphingolipids - Ceramides                 | HMDB04956        | -0.213        | 4.9E-02        | 0.058         | 5.6E-01        | -0.212        | 2.6E-02        | -0.088        | n/a            | 1.171         | 0.027        | 0.769         | 0.073        |
| C24:1 Ceramide (d18:1)               | C8-pos           | Sphingolipids - Ceramides                 | HMDB04953        | -0.305        | 4.1E-03        | -0.106        | 3.3E-01        | -0.307        | 1.0E-03        | -0.160        | n/a            | 0.443         | 0.422        | 0.189         | 0.709        |
| sphinganine                          | HILIC-pos        | Sphingolipids - Sphingolipids             | HMDB00269        | 0.334         | 6.9E-05        | 0.347         | 5.5E-05        | 0.240         | 2.5E-02        | 0.260         | 1.6E-02        | -0.388        | 0.508        | -0.573        | 0.320        |
| sphingosine-1-phosphate              | C18-neg          | Sphingolipids - Sphingolipids             | HMDB00277        | 0.220         | 4.9E-02        | 0.233         | 4.3E-02        | 0.203         | 3.2E-02        | 0.163         | 9.3E-02        |               |              |               |              |
| C14:0 SM                             | C8-pos           | Sphingolipids - Sphingomyelins            | HMDB12097        | -0.530        | 2.8E-07        | -0.370        | 9.2E-05        | -0.472        | 3.8E-07        | -0.524        | 2.3E-11        | 0.563         | 0.321        | 0.120         | 0.814        |
| C18:0 SM                             | C8-pos           | Sphingolipids - Sphingomyelins            | HMDB01348        | 0.297         | 4.8E-03        | 0.485         | 1.0E-07        | 0.206         | 2.9E-02        | 0.208         | 9.8E-03        | 0.549         | 0.373        | 0.110         | 0.843        |
| C18:1 SM                             | C8-pos           | Sphingolipids - Sphingomyelins            | HMDB12101        | 0.343         | 1.1E-03        | 0.490         | 1.6E-07        | 0.280         | 2.3E-03        | 0.243         | 2.9E-03        | 0.186         | 0.766        | -0.343        | 0.533        |
| C24:1 SM                             | C8-pos           | Sphingolipids - Sphingomyelins            | HMDB12107        | 0.308         | 6.5E-03        | 0.440         | 1.3E-05        | 0.421         | 2.4E-06        | 0.350         | 8.8E-06        | 0.432         | 0.466        | -0.190        | 0.695        |
| 2-hydroxyhexadecanoate               | C18-neg          | Fatty acids                               | HMDB31057        | -0.303        | 6.4E-03        | -0.295        | 9.3E-03        | -0.283        | 1.9E-03        | -0.280        | 2.7E-03        |               |              |               |              |
| 8,11,14-eicosatrienoic acid          | C18-neg          | Fatty acids                               | HMDB02925        | -0.288        | 5.5E-03        | -0.281        | 7.9E-03        | -0.298        | 7.0E-04        | -0.255        | 4.3E-03        |               |              |               |              |
| eicosanedioate                       | C18-neg          | Fatty acids                               | n/a              | 0.335         | 1.4E-03        | 0.311         | 3.8E-03        | 0.338         | 3.8E-04        | 0.294         | 2.5E-03        |               |              |               |              |
| gamma-linolenic acid                 | C18-neg          | Fatty acids                               | HMDB03073        | -0.374        | 8.5E-04        | -0.391        | 6.0E-04        | -0.379        | 3.2E-05        | -0.398        | 2.2E-05        |               |              |               |              |
| hexadecanedioate                     | C18-neg          | Fatty acids                               | HMDB00672        | -0.607        | 6.2E-09        | -0.629        | 4.4E-09        | -0.587        | 4.3E-11        | -0.604        | 4.1E-11        |               |              |               |              |
| hydroxymyristate                     | C18-neg          | Fatty acids                               | HMDB02261        | -0.673        | 4.1E-10        | -0.682        | 6.0E-10        | -0.688        | 7.1E-14        | -0.717        | 2.8E-14        |               |              |               |              |
| myristic acid                        | C18-neg          | Fatty acids                               | HMDB00806        | -0.206        | 3.4E-02        | -0.226        | 2.2E-02        | -0.214        | 1.4E-02        | -0.230        | 1.0E-02        |               |              |               |              |
| oleate                               | C18-neg          | Fatty acids                               | HMDB00207        | -0.298        | 3.1E-03        | -0.330        | 1.2E-03        | -0.288        | 3.2E-03        | -0.322        | 1.4E-03        |               |              |               |              |
| palmitoleic acid                     | C18-neg          | Fatty acids                               | HMDB03229        | -0.844        | 2.6E-15        | -0.908        | 4.8E-17        | -0.738        | 2.1E-17        | -0.794        | 3.2E-19        |               |              |               |              |
| sebacate                             | C18-neg          | Fatty acids                               | HMDB00792        | -0.294        | 2.9E-03        | -0.315        | 1.7E-03        | -0.374        | 1.4E-04        | -0.364        | 3.2E-04        |               |              |               |              |
| C12:1 carnitine                      | HILIC-pos        | Acylcarnitines                            | HMDB13326        | -0.503        | 1.5E-06        | -0.537        | 4.1E-07        | -0.311        | 7.6E-04        | -0.343        | 3.0E-04        | -0.385        | 0.476        | -0.499        | 0.355        |
| C14 carnitine                        | HILIC-pos        | Acylcarnitines                            | HMDB05066        | -0.354        | 6.9E-04        | -0.350        | 9.2E-04        | -0.267        | 3.5E-03        | -0.295        | 1.5E-03        | 0.505         | 0.346        | 0.436         | 0.414        |
| C14:1 carnitine                      | HILIC-pos        | Acylcarnitines                            | HMDB02014        | -0.321        | 2.4E-03        | -0.365        | 6.4E-04        | -0.192        | 3.7E-02        | -0.254        | 7.0E-03        | -0.077        | 0.885        | -0.145        | 0.785        |
| <b>C18 carnitine</b>                 | <b>HILIC-pos</b> | <b>Acylcarnitines</b>                     | <b>HMDB00848</b> | <b>0.351</b>  | <b>1.5E-03</b> | <b>0.396</b>  | <b>4.4E-04</b> | <b>0.321</b>  | <b>4.3E-05</b> | <b>0.307</b>  | <b>1.3E-04</b> | <b>1.268</b>  | <b>0.020</b> | <b>1.287</b>  | <b>0.016</b> |
| C5:1 carnitine                       | HILIC-pos        | Acylcarnitines                            | HMDB02366        | -0.241        | 1.1E-02        | -0.232        | 1.7E-02        | -0.321        | 1.6E-03        | -0.316        | 2.5E-03        | 0.716         | 0.201        | 0.597         | 0.287        |
| 2-aminooctanoate                     | HILIC-pos        | Amino Acids                               | HMDB00991        | -0.324        | 3.6E-03        | -0.364        | 1.2E-03        | -0.282        | 2.2E-03        | -0.330        | 4.9E-04        | -0.224        | 0.680        | -0.192        | 0.724        |
| 4-acetamidobutanoate                 | HILIC-pos        | Amino Acids                               | HMDB03681        | -0.495        | 5.3E-07        | -0.514        | 2.7E-07        | -0.271        | 2.8E-03        | -0.297        | 1.4E-03        | 0.013         | 0.979        | -0.024        | 0.962        |
| 5-acetylamino-6-amino-3-methyluracil | HILIC-pos        | Amino Acids                               | HMDB04400        | -0.650        | 2.6E-10        | -0.659        | 4.3E-10        | -0.546        | 8.7E-10        | -0.534        | 3.9E-09        | -0.160        | 0.772        | -0.212        | 0.704        |
| ADMA                                 | HILIC-pos        | Amino Acids                               | HMDB01539        | -0.511        | 4.1E-07        | -0.529        | 3.0E-07        | -0.547        | 1.4E-08        | -0.511        | 2.1E-07        | 0.595         | 0.337        | 0.775         | 0.205        |
| alanine                              | HILIC-pos        | Amino Acids                               | HMDB00161        | -0.465        | 1.9E-05        | -0.363        | 9.2E-04        | -0.434        | 2.4E-06        | -0.306        | 8.7E-04        | -0.860        | 0.123        | -0.929        | 0.093        |
| arginine                             | HILIC-pos        | Amino Acids                               | HMDB00517        | 0.280         | 5.1E-03        | 0.237         | 2.1E-02        | 0.282         | 4.0E-03        | 0.254         | 1.1E-02        | -0.703        | 0.211        | -0.830        | 0.142        |
| citrulline                           | HILIC-pos        | Amino Acids                               | HMDB00904        | -0.370        | 3.9E-04        | -0.414        | 8.9E-05        | -0.245        | 7.9E-03        | -0.335        | 3.6E-04        | 0.720         | 0.209        | 0.632         | 0.272        |
| creatinine                           | HILIC-pos        | Amino Acids                               | HMDB00562        | 0.290         | 5.7E-03        | 0.243         | 2.4E-02        | 0.289         | 2.5E-03        | 0.315         | 1.3E-03        | 0.357         | 0.447        | 0.485         | 0.302        |
| homocysteine                         | HILIC-pos        | Amino Acids                               | HMDB00670        | 0.611         | 1.5E-09        | 0.574         | 3.1E-08        | 0.634         | 2.2E-13        | 0.667         | 4.6E-14        | -0.502        | 0.319        | -0.471        | 0.357        |
| hydroxyproline                       | HILIC-pos        | Amino Acids                               | HMDB00725        | 0.318         | 7.0E-03        | 0.293         | 1.6E-02        | 0.587         | 1.4E-11        | 0.510         | 6.8E-09        | -0.026        | 0.966        | -0.119        | 0.846        |
| kynurenine                           | HILIC-neg        | Amino Acids                               | HMDB00684        | -0.594        | 3.8E-09        | -0.544        | 9.9E-08        | -0.422        | 2.1E-06        | -0.340        | 1.7E-04        | 0.035         | 0.952        | 0.009         | 0.988        |
| lysine                               | HILIC-pos        | Amino Acids                               | HMDB00182        | -0.338        | 1.8E-03        | -0.347        | 1.7E-03        | -0.417        | 5.9E-06        | -0.378        | 6.6E-05        | -0.602        | 0.279        | -0.595        | 0.291        |
| N-acetylorithine                     | HILIC-pos        | Amino Acids                               | HMDB03357        | -0.718        | 3.6E-11        | -0.707        | 2.5E-10        | -0.707        | 1.6E-15        | -0.713        | 4.2E-15        | 0.701         | 0.215        | 0.727         | 0.197        |
| N-alpha-acetylarginine               | HILIC-pos        | Amino Acids                               | HMDB04620        | 0.596         | 1.5E-08        | 0.590         | 4.1E-08        | 0.751         | 8.7E-16        | 0.717         | 4.9E-14        | 0.192         | 0.734        | 0.064         | 0.911        |
| N6,N6-dimethyllysine                 | HILIC-pos        | Amino Acids                               | HMDB13287        | -1.060        | 1.5E-24        | -1.058        | 1.9E-23        | -0.953        | 6.1E-25        | -0.965        | 1.6E-24        |               |              |               |              |
| ornithine                            | HILIC-pos        | Amino Acids                               | HMDB00214        | -0.362        | 6.2E-04        | -0.369        | 6.4E-04        | -0.624        | 2.2E-11        | -0.629        | 5.0E-11        | 0.010         | 0.986        | 0.014         | 0.980        |
| pantothenate                         | HILIC-neg        | Amino Acids                               | HMDB00210        | -0.247        | 1.9E-02        | -0.224        | 4.1E-02        | -0.436        | 3.0E-06        | -0.415        | 1.5E-05        | 1.464         | 0.021        | 1.397         | 0.029        |
| phenylalanine                        | HILIC-pos        | Amino Acids                               | HMDB00159        | -0.246        | 2.6E-02        | -0.193        | 9.2E-02        | -0.261        | 4.3E-03        | -0.195        | n/a            | 0.529         | 0.333        | 0.781         | 0.143        |
| <b>proline</b>                       | <b>HILIC-pos</b> | <b>Amino Acids</b>                        | <b>HMDB00162</b> | <b>-0.352</b> | <b>1.4E-03</b> | <b>-0.283</b> | <b>1.1E-02</b> | <b>-0.297</b> | <b>1.2E-03</b> | <b>-0.212</b> | <b>2.1E-02</b> | <b>-1.113</b> | <b>0.043</b> | <b>-1.062</b> | <b>0.053</b> |

| Metabolite name                          | Method    | Category                       | HMDB ID   | WHI-OS  |         |         |         | WHI-HT  |         |         |         | MESA    |       |         |       |
|------------------------------------------|-----------|--------------------------------|-----------|---------|---------|---------|---------|---------|---------|---------|---------|---------|-------|---------|-------|
|                                          |           |                                |           | Model 1 |         | Model 2 |         | Model 1 |         | Model 2 |         | Model 1 |       | Model 2 |       |
|                                          |           |                                |           | Beta    | FDR     | Beta    | FDR     | Beta    | FDR     | Beta    | FDR     | Beta    | Raw-p | Beta    | Raw-p |
| serine                                   | HILIC-pos | Amino Acids                    | HMDB00187 | 0.293   | 3.9E-03 | 0.246   | 1.7E-02 | 0.313   | 1.0E-03 | 0.235   | 1.5E-02 | -0.257  | 0.667 | -0.256  | 0.672 |
| taurine                                  | HILIC-pos | Amino Acids                    | HMDB00251 | 0.307   | 6.8E-03 | 0.314   | 6.8E-03 | 0.263   | 4.5E-03 | 0.207   | 2.7E-02 | 0.511   | 0.369 | 0.410   | 0.475 |
| bilirubin                                | HILIC-pos | Bile acids and Bilirubins      | HMDB00054 | -0.356  | 1.8E-04 | -0.377  | 9.2E-05 | -0.401  | 2.5E-05 | -0.457  | 2.6E-06 | 0.016   | 0.974 | -0.061  | 0.905 |
| biliverdin                               | HILIC-pos | Bile acids and Bilirubins      | HMDB01008 | -0.388  | 1.8E-04 | -0.429  | 4.8E-05 | -0.352  | 1.8E-04 | -0.392  | 5.0E-05 | 0.108   | 0.817 | 0.122   | 0.795 |
| glycochenodeoxycholate                   | C18-neg   | Bile acids and Bilirubins      | HMDB00637 | -0.289  | 1.0E-02 | -0.299  | 9.5E-03 | -0.320  | 5.2E-04 | -0.329  | 5.1E-04 |         |       |         |       |
| glycodeoxycholate                        | C18-neg   | Bile acids and Bilirubins      | HMDB00631 | -0.239  | 2.8E-02 | -0.247  | 2.6E-02 | -0.257  | 6.1E-03 | -0.257  | 7.3E-03 |         |       |         |       |
| glycodeoxycholate/glycochenodeoxycholate | HILIC-pos | Bile acids and Bilirubins      | n/a       | -0.343  | 2.4E-03 | -0.351  | 2.3E-03 | -0.341  | 1.5E-04 | -0.340  | 2.4E-04 | 0.757   | 0.193 | 0.731   | 0.212 |
| glycoursodeoxycholate                    | C18-neg   | Bile acids and Bilirubins      | HMDB00708 | -0.451  | 5.9E-05 | -0.446  | 1.1E-04 | -0.497  | 6.3E-08 | -0.513  | 5.3E-08 |         |       |         |       |
| 1,7-dimethyluric acid                    | HILIC-pos | Purines and Pyrimidines        | HMDB11103 | -0.578  | 1.3E-07 | -0.591  | 1.2E-07 | -0.477  | 1.0E-07 | -0.446  | 1.0E-06 |         |       |         |       |
| 3-methylxanthine                         | HILIC-pos | Purines and Pyrimidines        | HMDB01886 | -0.756  | 1.2E-12 | -0.767  | 2.4E-12 | -0.614  | 1.9E-11 | -0.602  | 1.1E-10 | 0.117   | 0.826 | 0.021   | 0.969 |
| 7-methylxanthine                         | HILIC-pos | Purines and Pyrimidines        | HMDB01991 | -0.706  | 1.4E-11 | -0.716  | 2.7E-11 | -0.565  | 9.8E-10 | -0.559  | 3.5E-09 | 0.500   | 0.379 | 0.462   | 0.421 |
| ADP                                      | HILIC-neg | Purines and Pyrimidines        | HMDB01341 | 0.351   | 1.6E-03 | 0.367   | 1.2E-03 | 0.275   | 3.6E-03 | 0.241   | 1.3E-02 | 0.942   | 0.100 | 0.966   | 0.094 |
| AMP                                      | HILIC-neg | Purines and Pyrimidines        | HMDB00045 | 0.446   | 4.2E-05 | 0.467   | 2.7E-05 | 0.476   | 3.4E-07 | 0.452   | 2.2E-06 |         |       |         |       |
| CMP                                      | HILIC-neg | Purines and Pyrimidines        | HMDB00095 | 0.467   | 3.6E-05 | 0.498   | 1.6E-05 | 0.380   | 3.2E-06 | 0.394   | 2.5E-06 |         |       |         |       |
| GDP                                      | HILIC-neg | Purines and Pyrimidines        | HMDB01201 | 0.287   | 1.0E-02 | 0.301   | 8.2E-03 | 0.206   | 3.1E-02 | 0.167   | 8.6E-02 |         |       |         |       |
| GMP                                      | HILIC-neg | Purines and Pyrimidines        | HMDB01397 | 0.364   | 9.8E-04 | 0.376   | 8.5E-04 | 0.406   | 1.2E-05 | 0.372   | 9.4E-05 |         |       |         |       |
| hypoxanthine                             | HILIC-neg | Purines and Pyrimidines        | HMDB00157 | 0.379   | 4.6E-04 | 0.363   | 1.0E-03 | 0.344   | 1.9E-04 | 0.350   | 2.3E-04 | 1.557   | 0.008 | 1.602   | 0.007 |
| IMP                                      | HILIC-neg | Purines and Pyrimidines        | HMDB00175 | 0.297   | 3.6E-03 | 0.296   | 4.5E-03 | 0.219   | 2.0E-02 | 0.168   | 8.1E-02 |         |       |         |       |
| inosine                                  | HILIC-neg | Purines and Pyrimidines        | HMDB00195 | 0.390   | 1.3E-04 | 0.404   | 1.1E-04 | 0.321   | 9.3E-04 | 0.338   | 6.9E-04 | 0.595   | 0.323 | 0.716   | 0.233 |
| N4-acetylcytidine                        | HILIC-pos | Purines and Pyrimidines        | HMDB05923 | -0.400  | 5.9E-05 | -0.351  | 5.9E-04 | -0.385  | 1.7E-05 | -0.301  | 9.3E-04 | -0.480  | 0.417 | -0.538  | 0.367 |
| UDP                                      | HILIC-neg | Purines and Pyrimidines        | HMDB00295 | 0.365   | 7.2E-04 | 0.402   | 2.6E-04 | 0.219   | 2.1E-02 | 0.221   | 2.1E-02 |         |       |         |       |
| UMP                                      | HILIC-neg | Purines and Pyrimidines        | HMDB00288 | 0.447   | 2.0E-05 | 0.472   | 1.1E-05 | 0.369   | 4.2E-05 | 0.355   | 1.3E-04 |         |       |         |       |
| alpha-glycerophosphocholine              | HILIC-pos | Quaternary Amines              | HMDB00086 | 0.304   | 5.2E-03 | 0.360   | 1.0E-03 | 0.241   | 1.1E-02 | 0.252   | 9.2E-03 | 0.314   | 0.590 | 0.214   | 0.715 |
| betaine                                  | HILIC-pos | Quaternary Amines              | HMDB00043 | 0.377   | 2.0E-04 | 0.382   | 2.4E-04 | 0.377   | 7.0E-06 | 0.351   | 4.7E-05 | 0.807   | 0.144 | 0.880   | 0.112 |
| kynurenic acid                           | HILIC-pos | Indoles and Indole derivatives | HMDB00715 | -0.437  | 2.4E-05 | -0.406  | 1.3E-04 | -0.278  | 2.3E-03 | -0.272  | 3.6E-03 | -0.964  | 0.081 | -0.967  | 0.082 |
| 1-methylnicotinamide                     | HILIC-pos | Pyridines and derivatives      | HMDB00699 | -0.442  | 1.8E-05 | -0.435  | 3.9E-05 | -0.249  | 7.4E-03 | -0.265  | 5.3E-03 | -0.092  | 0.865 | -0.238  | 0.663 |
| 4-pyridoxate                             | HILIC-neg | Pyridines and derivatives      | HMDB00017 | -0.351  | 6.4E-04 | -0.351  | 8.3E-04 | -0.316  | 5.8E-04 | -0.313  | 9.2E-04 |         |       |         |       |
| N1-methyl-2-pyridone-5-carboxamide       | HILIC-pos | Pyridines and derivatives      | HMDB04193 | -0.388  | 2.6E-04 | -0.368  | 7.4E-04 | -0.308  | 1.0E-03 | -0.279  | 3.6E-03 | 1.219   | 0.035 | 1.049   | 0.070 |
| adipate                                  | HILIC-neg | Dicarboxylic acids             | HMDB00448 | -0.317  | 1.9E-03 | -0.323  | 2.0E-03 | -0.319  | 1.2E-03 | -0.330  | 1.1E-03 |         |       |         |       |
| methylmalonate                           | HILIC-neg | Dicarboxylic acids             | HMDB00202 | -0.480  | 3.9E-06 | -0.458  | 1.8E-05 | -0.453  | 1.1E-06 | -0.475  | 6.6E-07 |         |       |         |       |
| 2-phosphoglycerate                       | HILIC-neg | Organic acids                  | HMDB00362 | 0.249   | 1.6E-02 | 0.267   | 1.2E-02 | 0.389   | 8.0E-05 | 0.351   | 5.2E-04 |         |       |         |       |
| hexose monophosphate                     | HILIC-neg | Carbohydrates and conjugates   | HMDB00124 | 0.315   | 4.5E-03 | 0.337   | 2.9E-03 | 0.329   | 4.3E-04 | 0.295   | 2.0E-03 |         |       |         |       |
| lactose                                  | HILIC-neg | Carbohydrates and conjugates   | HMDB00186 | 0.226   | 4.9E-02 | 0.238   | 4.4E-02 | 0.317   | 6.3E-04 | 0.322   | 7.2E-04 |         |       |         |       |
| pentose monophosphate                    | HILIC-neg | Carbohydrates and conjugates   | HMDB01548 | 0.285   | 1.0E-02 | 0.301   | 7.9E-03 | 0.249   | 6.5E-03 | 0.226   | 1.5E-02 |         |       |         |       |
| acetaminophen                            | HILIC-pos | Benzenoids                     | HMDB01859 | -0.351  | 4.3E-03 | -0.406  | 1.0E-03 | -0.292  | 1.4E-04 | -0.302  | 1.3E-04 | 0.548   | 0.389 | 0.553   | 0.389 |
| allantoin                                | HILIC-pos | Others                         | HMDB00462 | -0.290  | 1.8E-03 | -0.300  | 1.6E-03 | -0.221  | 2.7E-02 | -0.213  | 3.8E-02 |         |       |         |       |
| caffeine                                 | HILIC-pos | Others                         | HMDB01847 | -0.532  | 1.9E-06 | -0.515  | 7.2E-06 | -0.325  | 1.7E-04 | -0.265  | 2.4E-03 | -0.820  | 0.133 | -0.908  | 0.095 |
| carboxyibuprofen                         | C18-neg   | Others                         | n/a       | -0.288  | 8.9E-03 | -0.329  | 3.2E-03 | -0.218  | 1.5E-02 | -0.249  | 6.9E-03 |         |       |         |       |
| cortisol                                 | HILIC-pos | Others                         | HMDB00063 | -0.514  | 3.6E-07 | -0.513  | 6.7E-07 | -0.238  | 1.4E-02 | -0.262  | 8.7E-03 | 0.359   | 0.545 | 0.180   | 0.762 |
| hydroxyectoine                           | HILIC-pos | Others                         | n/a       | -0.407  | 9.5E-05 | -0.448  | 2.3E-05 | -0.259  | 4.9E-03 | -0.346  | 2.3E-04 |         |       |         |       |
| piperine                                 | HILIC-pos | Others                         | HMDB29377 | 0.576   | 6.8E-09 | 0.572   | 2.0E-08 | 0.481   | 6.3E-08 | 0.469   | 2.8E-07 | -0.788  | 0.149 | -0.798  | 0.148 |
| pseudouridine                            | HILIC-pos | Others                         | HMDB00767 | -0.433  | 1.1E-05 | -0.409  | 5.0E-05 | -0.321  | 5.2E-04 | -0.275  | 3.6E-03 | -0.225  | 0.676 | -0.214  | 0.695 |
| thiamine                                 | HILIC-pos | Others                         | HMDB00235 | -0.354  | 5.8E-04 | -0.375  | 3.5E-04 | -0.422  | 4.2E-06 | -0.417  | 9.7E-06 |         |       |         |       |
| trigonelline                             | HILIC-pos | Others                         | HMDB00875 | -0.577  | 1.8E-08 | -0.586  | 2.5E-08 | -0.499  | 5.9E-08 | -0.530  | 1.8E-08 | 0.635   | 0.281 | 0.661   | 0.267 |

Model 1 (fully adjusted model) is adjusted for coronary heart disease case-control status (WHI only), age (a matching factor in the WHI), enrollment window (WHI only; a matching factor in the WHI), hysterectomy status, hormone therapy use status, body mass index, smoking status, alcohol consumption, education, family income, physical activity, baseline diseases (diabetes, hypertension, and depression), and medication use (aspirin, lipid-lowering, antihyperglycemic, antihypertensive, and antidepressants).

Model 2 (lipid-adjusted model) is adjusted for variables in Model 1 plus plasma levels of total cholesterol and high-density lipoprotein cholesterol.

Supplementary Table S5. Magnitude of difference in metabolites that were more than 0.5-SD between Black and White women, and their associations with risk of coronary heart disease in the WHI, JHS, and NHS.

| Method                                                 | Metabolite             | HMDB ID    | Category                                                     | SD-difference |                | Associations between metabolite with large race differences and CHD risk in women from WHI, JHS, and NHS |              |                   |       |                          |              |                          |              |                          |              |
|--------------------------------------------------------|------------------------|------------|--------------------------------------------------------------|---------------|----------------|----------------------------------------------------------------------------------------------------------|--------------|-------------------|-------|--------------------------|--------------|--------------------------|--------------|--------------------------|--------------|
|                                                        |                        |            |                                                              | in the WHI-HT |                | All women (WHI)                                                                                          |              | Black women (WHI) |       | Black women (JHS)        |              | White women (WHI)        |              | White women (NHS)        |              |
|                                                        |                        |            |                                                              | Beta          | FDR-P          | OR (95% CI)                                                                                              | FDR          | OR (95% CI)       | FDR   | HR (95% CI)              | raw-P        | OR (95% CI)              | FDR          | HR (95% CI)              | raw-P        |
| <b>Metabolites with &gt;1 SD higher in Black women</b> |                        |            |                                                              |               |                |                                                                                                          |              |                   |       |                          |              |                          |              |                          |              |
| C8-pos                                                 | C40:2 PE plasmalogen   | HMDB11394* | Glycerophospholipids - Phosphatidylethanolamine plasmalogens | <b>1.057</b>  | <b>6.4E-30</b> | 0.95 (0.83, 1.09)                                                                                        | 0.770        | 0.77 (0.47, 1.26) | 0.867 | 1.09 (0.88, 1.36)        | 0.413        | 0.97 (0.84, 1.12)        | 0.906        | 1.02 (0.85, 1.23)        | 0.821        |
| C8-pos                                                 | C20:4 CE               | HMDB06726  | Sterol lipids - Cholesteryl esters                           | <b>1.121</b>  | <b>2.1E-33</b> | 1.06 (0.91, 1.24)                                                                                        | 0.775        | 0.87 (0.49, 1.55) | 0.963 | -                        | -            | 1.08 (0.91, 1.27)        | 0.733        | 0.97 (0.80, 1.19)        | 0.778        |
| C8-pos                                                 | C22:4 CE               | HMDB06729* | Sterol lipids - Cholesteryl esters                           | <b>1.072</b>  | <b>1.7E-30</b> | 1.02 (0.88, 1.18)                                                                                        | 0.929        | 1.04 (0.58, 1.85) | 0.998 | -                        | -            | 1.03 (0.88, 1.20)        | 0.921        | 0.96 (0.70, 1.31)        | 0.785        |
| C8-pos                                                 | C22:6 CE               | HMDB06733  | Sterol lipids - Cholesteryl esters                           | <b>1.241</b>  | <b>4.9E-44</b> | 1.01 (0.88, 1.17)                                                                                        | 0.938        | 0.86 (0.52, 1.40) | 0.932 | -                        | -            | 1.04 (0.89, 1.20)        | 0.883        | 0.98 (0.80, 1.20)        | 0.861        |
| <b>Metabolites with 0.5-1 SD higher in Black women</b> |                        |            |                                                              |               |                |                                                                                                          |              |                   |       |                          |              |                          |              |                          |              |
| C8-pos                                                 | C36:2 PC plasmalogen-B | HMDB11243* | Glycerophospholipids - Phosphatidylcholine plasmalogens      | 0.586         | 7.7E-12        | <b>1.28 (1.09, 1.49)</b>                                                                                 | <b>0.032</b> | 1.62 (0.94, 2.80) | 0.867 | -                        | -            | <b>1.25 (1.06, 1.47)</b> | <b>0.080</b> | 1.07 (0.88, 1.31)        | 0.476        |
| C8-pos                                                 | C18:1 CE               | HMDB00918  | Sterol lipids - Cholesteryl esters                           | 0.611         | 7.3E-11        | <b>1.24 (1.06, 1.46)</b>                                                                                 | <b>0.074</b> | 1.47 (0.82, 2.65) | 0.867 | -                        | -            | 1.24 (1.04, 1.47)        | 0.128        | 0.99 (0.80, 1.22)        | 0.916        |
| C8-pos                                                 | C36:5 PE plasmalogen   | HMDB11410* | Glycerophospholipids - Phosphatidylethanolamine plasmalogens | 0.824         | 1.0E-19        | <b>0.84 (0.74, 0.96)</b>                                                                                 | <b>0.078</b> | 0.66 (0.44, 1.01) | 0.867 | 1.05 (0.86, 1.29)        | 0.638        | 0.87 (0.76, 1.00)        | 0.268        | 0.98 (0.81, 1.18)        | 0.814        |
| C8-pos                                                 | C58:9 TAG              | HMDB05463* | Glycerolipids - Triacylglycerols                             | 0.649         | 1.8E-13        | 0.85 (0.74, 0.97)                                                                                        | 0.117        | 0.99 (0.65, 1.52) | 0.998 | -                        | -            | 0.84 (0.73, 0.96)        | 0.119        | 0.89 (0.71, 1.10)        | 0.270        |
| C8-pos                                                 | C58:10 TAG             | HMDB05476* | Glycerolipids - Triacylglycerols                             | 0.651         | 2.1E-13        | 0.85 (0.75, 0.97)                                                                                        | 0.124        | 0.99 (0.65, 1.52) | 0.998 | -                        | -            | 0.84 (0.73, 0.97)        | 0.127        | 0.93 (0.77, 1.14)        | 0.494        |
| C8-pos                                                 | C60:12 TAG             | HMDB05478* | Glycerolipids - Triacylglycerols                             | 0.771         | 2.8E-18        | 0.86 (0.75, 0.98)                                                                                        | 0.182        | 0.97 (0.63, 1.50) | 0.998 | -                        | -            | 0.85 (0.73, 0.98)        | 0.152        | 1.01 (0.82, 1.25)        | 0.918        |
| C8-pos                                                 | C38:6 PE plasmalogen   | HMDB11387* | Glycerophospholipids - Phosphatidylethanolamine plasmalogens | 0.766         | 1.6E-16        | 0.86 (0.75, 0.98)                                                                                        | 0.185        | 0.59 (0.38, 0.94) | 0.867 | 1.08 (0.87, 1.35)        | 0.464        | 0.89 (0.77, 1.03)        | 0.472        | 1.01 (0.84, 1.22)        | 0.917        |
| C8-pos                                                 | C18:2 CE               | HMDB00610* | Sterol lipids - Cholesteryl esters                           | 0.538         | 9.4E-09        | 1.16 (0.99, 1.35)                                                                                        | 0.320        | 1.34 (0.76, 2.35) | 0.867 | -                        | -            | 1.16 (0.98, 1.37)        | 0.397        | 1.06 (0.83, 1.36)        | 0.649        |
| C8-pos                                                 | C58:8 TAG              | HMDB05413* | Glycerolipids - Triacylglycerols                             | 0.699         | 1.8E-14        | 0.88 (0.77, 1.01)                                                                                        | 0.320        | 1.06 (0.66, 1.70) | 0.998 | -                        | -            | 0.87 (0.75, 1.00)        | 0.268        | <b>0.51 (0.32, 0.80)</b> | <b>0.004</b> |
| HILIC-pos                                              | homoarginine           | HMDB00670  | Amino Acids                                                  | 0.634         | 2.2E-13        | 0.89 (0.78, 1.02)                                                                                        | 0.363        | 0.94 (0.60, 1.46) | 0.991 | <b>0.81 (0.65, 1.00)</b> | <b>0.049</b> | 0.89 (0.77, 1.02)        | 0.429        | 0.96 (0.80, 1.15)        | 0.640        |
| C8-pos                                                 | C20:3 CE               | HMDB06736* | Sterol lipids - Cholesteryl esters                           | 0.534         | 2.0E-08        | 1.12 (0.97, 1.28)                                                                                        | 0.398        | 1.47 (0.89, 2.42) | 0.867 | -                        | -            | 1.08 (0.94, 1.25)        | 0.646        | 1.13 (0.93, 1.36)        | 0.214        |
| C8-pos                                                 | C38:7 PE plasmalogen   | HMDB11420* | Glycerophospholipids - Phosphatidylethanolamine plasmalogens | 0.986         | 1.8E-27        | 0.90 (0.78, 1.03)                                                                                        | 0.398        | 0.64 (0.39, 1.04) | 0.867 | 1.09 (0.89, 1.34)        | 0.414        | 0.93 (0.80, 1.07)        | 0.696        | 0.99 (0.82, 1.20)        | 0.914        |
| HILIC-pos                                              | hydroxyproline         | HMDB00725  | Amino Acids                                                  | 0.587         | 1.4E-11        | 0.91 (0.80, 1.03)                                                                                        | 0.422        | 0.90 (0.63, 1.28) | 0.946 | 1.08 (0.89, 1.31)        | 0.451        | 0.91 (0.79, 1.04)        | 0.508        | 0.94 (0.78, 1.12)        | 0.463        |
| C8-pos                                                 | C38:6 PE plasmalogen   | HMDB11386* | Glycerophospholipids - Phosphatidylethanolamine plasmalogens | 0.746         | 9.4E-16        | 0.91 (0.80, 1.04)                                                                                        | 0.473        | 0.76 (0.50, 1.15) | 0.867 | 1.06 (0.86, 1.30)        | 0.604        | 0.93 (0.80, 1.07)        | 0.654        | 1.01 (0.84, 1.22)        | 0.911        |
| C8-pos                                                 | C40:6 PC-B             | HMDB08057* | Glycerophospholipids - Phosphatidylcholines                  | 0.584         | 2.5E-10        | 0.92 (0.81, 1.06)                                                                                        | 0.587        | 0.87 (0.56, 1.34) | 0.931 | -                        | -            | 0.93 (0.81, 1.07)        | 0.706        | 1.00 (0.82, 1.21)        | 0.989        |
| C8-pos                                                 | C16:0 CE               | HMDB00885  | Sterol lipids - Cholesteryl esters                           | 0.728         | 3.9E-14        | 1.08 (0.93, 1.27)                                                                                        | 0.662        | 0.98 (0.56, 1.75) | 0.998 | -                        | -            | 1.08 (0.92, 1.28)        | 0.707        | 1.00 (0.81, 1.23)        | 0.994        |
| C8-pos                                                 | C38:6 PC plasmalogen-A | HMDB11319* | Glycerophospholipids - Phosphatidylcholine plasmalogens      | 0.687         | 3.8E-14        | 0.95 (0.83, 1.08)                                                                                        | 0.743        | 0.97 (0.64, 1.47) | 0.998 | 1.20 (0.97, 1.49)        | 0.088        | 0.94 (0.82, 1.08)        | 0.739        | -                        | -            |
| C8-pos                                                 | C36:5 PC plasmalogen-B | HMDB11220* | Glycerophospholipids - Phosphatidylcholine plasmalogens      | 0.690         | 2.0E-13        | 0.95 (0.82, 1.09)                                                                                        | 0.770        | 0.98 (0.68, 1.40) | 0.998 | 1.07 (0.88, 1.31)        | 0.501        | 0.93 (0.80, 1.09)        | 0.733        | 0.90 (0.74, 1.10)        | 0.306        |
| C8-pos                                                 | C40:7 PC plasmalogen   | HMDB11294* | Glycerophospholipids - Phosphatidylcholine plasmalogens      | 0.659         | 2.6E-12        | 1.06 (0.92, 1.21)                                                                                        | 0.770        | 1.19 (0.77, 1.83) | 0.919 | -                        | -            | 1.04 (0.89, 1.21)        | 0.883        | -                        | -            |
| C8-pos                                                 | C38:7 PC plasmalogen   | HMDB11229* | Glycerophospholipids - Phosphatidylcholine plasmalogens      | 0.910         | 1.4E-23        | 0.95 (0.83, 1.09)                                                                                        | 0.785        | 0.86 (0.55, 1.32) | 0.927 | 1.14 (0.92, 1.40)        | 0.226        | 0.96 (0.83, 1.11)        | 0.867        | 0.99 (0.79, 1.23)        | 0.911        |
| C8-pos                                                 | C22:5 CE               | HMDB10375* | Sterol lipids - Cholesteryl esters                           | 0.936         | 4.5E-27        | 1.04 (0.91, 1.20)                                                                                        | 0.819        | 0.93 (0.58, 1.50) | 0.991 | -                        | -            | 1.06 (0.92, 1.23)        | 0.768        | 1.00 (0.80, 1.25)        | 0.989        |
| C8-pos                                                 | C38:6 PC plasmalogen-B | HMDB11319* | Glycerophospholipids - Phosphatidylcholine plasmalogens      | 0.516         | 4.5E-08        | 0.97 (0.84, 1.12)                                                                                        | 0.881        | 0.88 (0.55, 1.42) | 0.959 | -                        | -            | 0.97 (0.84, 1.13)        | 0.921        | -                        | -            |
| HILIC-pos                                              | N-alpha-acetylarginine | HMDB04620  | Amino Acids                                                  | 0.751         | 8.7E-16        | 0.98 (0.86, 1.11)                                                                                        | 0.904        | 0.88 (0.58, 1.35) | 0.948 | 0.89 (0.73, 1.08)        | 0.233        | 0.99 (0.87, 1.14)        | 0.988        | 0.87 (0.71, 1.06)        | 0.155        |
| C8-pos                                                 | C20:2 CE               | HMDB06734  | Sterol lipids - Cholesteryl esters                           | 0.794         | 1.8E-18        | 1.02 (0.88, 1.18)                                                                                        | 0.934        | 1.38 (0.80, 2.36) | 0.867 | -                        | -            | 0.99 (0.85, 1.16)        | 0.988        | -                        | -            |
| C8-pos                                                 | C20:1 CE               | HMDB05193  | Sterol lipids - Cholesteryl esters                           | 0.627         | 4.4E-12        | 1.00 (0.87, 1.15)                                                                                        | 0.977        | 1.47 (0.82, 2.65) | 0.867 | -                        | -            | 0.97 (0.84, 1.13)        | 0.921        | -                        | -            |
| <b>Metabolites with &gt;1 SD lower in Black women</b>  |                        |            |                                                              |               |                |                                                                                                          |              |                   |       |                          |              |                          |              |                          |              |
| C8-pos                                                 | C51:3 TAG              | n/a        | Glycerolipids - Triacylglycerols                             | <b>-1.020</b> | <b>1.8E-29</b> | <b>0.81 (0.70, 0.94)</b>                                                                                 | <b>0.066</b> | 0.99 (0.58, 1.70) | 0.998 | -                        | -            | <b>0.78 (0.67, 0.92)</b> | <b>0.049</b> | -                        | -            |
| C8-pos                                                 | C49:3 TAG              | HMDB42103* | Glycerolipids - Triacylglycerols                             | <b>-1.061</b> | <b>1.8E-31</b> | 0.87 (0.75, 1.01)                                                                                        | 0.320        | 1.17 (0.70, 1.94) | 0.944 | -                        | -            | 0.83 (0.71, 0.97)        | 0.138        | 0.99 (0.81, 1.20)        | 0.883        |
| C8-pos                                                 | C50:3 TAG              | HMDB05433* | Glycerolipids - Triacylglycerols                             | <b>-1.046</b> | <b>1.1E-32</b> | 0.87 (0.74, 1.01)                                                                                        | 0.328        | 0.96 (0.59, 1.56) | 0.998 | -                        | -            | 0.83 (0.70, 0.98)        | 0.192        | 1.03 (0.83, 1.29)        | 0.793        |
| C8-pos                                                 | C32:2 PC               | HMDB07874* | Glycerophospholipids - Phosphatidylcholines                  | <b>-1.050</b> | <b>2.6E-35</b> | 0.90 (0.78, 1.03)                                                                                        | 0.431        | 1.22 (0.74, 2.00) | 0.917 | 1.10 (0.89, 1.37)        | 0.373        | 0.87 (0.75, 1.01)        | 0.359        | 1.00 (0.81, 1.24)        | 0.975        |
| C8-pos                                                 | C34:3 PC               | HMDB08006* | Glycerophospholipids - Phosphatidylcholines                  | <b>-1.004</b> | <b>1.2E-32</b> | 0.96 (0.83, 1.11)                                                                                        | 0.848        | 1.01 (0.63, 1.61) | 0.998 | 1.22 (0.98, 1.51)        | 0.081        | 0.95 (0.82, 1.11)        | 0.829        | 1.00 (0.80, 1.23)        | 0.964        |
| C8-pos                                                 | C31:1 PC               | HMDB07936* | Glycerophospholipids - Phosphatidylcholines                  | <b>-1.087</b> | <b>2.1E-33</b> | 0.98 (0.85, 1.13)                                                                                        | 0.929        | 1.62 (0.92, 2.83) | 0.867 | -                        | -            | 0.93 (0.80, 1.08)        | 0.706        | -                        | -            |
| <b>Metabolites with 0.5-1 SD lower in Black women</b>  |                        |            |                                                              |               |                |                                                                                                          |              |                   |       |                          |              |                          |              |                          |              |
| C8-pos                                                 | C36:4 DAG-A            | HMDB07248* | Glycerolipids - Diacylglycerols                              | -0.611        | 2.7E-11        | <b>0.80 (0.69, 0.92)</b>                                                                                 | <b>0.032</b> | 0.68 (0.40, 1.16) | 0.867 | -                        | -            | <b>0.81 (0.69, 0.94)</b> | <b>0.072</b> | 0.98 (0.79, 1.21)        | 0.846        |
| C8-pos                                                 | C52:6 TAG              | HMDB05436* | Glycerolipids - Triacylglycerols                             | -0.663        | 3.5E-13        | <b>0.80 (0.70, 0.92)</b>                                                                                 | <b>0.032</b> | 0.85 (0.55, 1.32) | 0.927 | -                        | -            | <b>0.79 (0.68, 0.92)</b> | <b>0.049</b> | 0.94 (0.74, 1.19)        | 0.608        |
| C8-pos                                                 | C50:4 TAG              | HMDB05435* | Glycerolipids - Triacylglycerols                             | -0.945        | 5.0E-26        | <b>0.80 (0.69, 0.94)</b>                                                                                 | <b>0.063</b> | 0.84 (0.52, 1.37) | 0.927 | -                        | -            | <b>0.78 (0.67, 0.93)</b> | <b>0.054</b> | 0.93 (0.71, 1.22)        | 0.590        |
| C8-pos                                                 | C50:6 TAG              | HMDB10497* | Glycerolipids - Triacylglycerols                             | -0.529        | 9.4E-09        | <b>0.83 (0.72, 0.95)</b>                                                                                 | <b>0.064</b> | 0.97 (0.64, 1.45) | 0.998 | -                        | -            | <b>0.80 (0.69, 0.93)</b> | <b>0.049</b> | 0.97 (0.79, 1.20)        | 0.773        |
| C8-pos                                                 | C50:5 TAG              | HMDB10471* | Glycerolipids - Triacylglycerols                             | -0.781        | 6.8E-18        | <b>0.82 (0.71, 0.94)</b>                                                                                 | <b>0.066</b> | 0.87 (0.56, 1.36) | 0.946 | -                        | -            | <b>0.80 (0.69, 0.94)</b> | <b>0.066</b> | 0.99 (0.79, 1.24)        | 0.931        |
| C8-pos                                                 | C36:3 DAG              | HMDB07219* | Glycerolipids - Diacylglycerols                              | -0.783        | 4.7E-18        | <b>0.81 (0.69, 0.94)</b>                                                                                 | <b>0.069</b> | 0.75 (0.44, 1.29) | 0.867 | -                        | -            | <b>0.80 (0.68, 0.94)</b> | <b>0.080</b> | 0.99 (0.79, 1.24)        | 0.917        |
| C8-pos                                                 | C34:3 DAG              | HMDB07132* | Glycerolipids - Diacylglycerols                              | -0.975        | 2.2E-27        | <b>0.80 (0.68, 0.94)</b>                                                                                 | <b>0.072</b> | 0.84 (0.49, 1.41) | 0.930 | -                        | -            | <b>0.77 (0.65, 0.92)</b> | <b>0.057</b> | 0.90 (0.69, 1.18)        | 0.452        |
| C8-pos                                                 | C52:4 TAG              | HMDB05363* | Glycerolipids - Triacylglycerols                             | -0.743        | 1.1E-15        | <b>0.82 (0.71, 0.96)</b>                                                                                 | <b>0.093</b> | 0.70 (0.42, 1.19) | 0.867 | -                        | -            | 0.83 (0.71, 0.98)        | 0.157        | 0.97 (0.80, 1.19)        | 0.787        |
| C8-pos                                                 | C18:1 LPE              | HMDB11506  | Glycerophospholipids - Lysophosphatidylethanolamines         | -0.530        | 3.2E-08        | 1.17 (1.03, 1.33)                                                                                        | 0.124        | 1.27 (0.84, 1.91) | 0.867 | 1.03 (0.84, 1.28)        | 0.750        | 1.15 (1.01, 1.32)        | 0.244        | 1.03 (0.86, 1.24)        | 0.737        |
| C8-pos                                                 | C38:3 DAG              | HMDB07168* | Glycerolipids - Diacylglycerols                              | -0.683        | 6.3E-14        | 0.85 (0.73, 0.98)                                                                                        | 0.185        | 0.95 (0.58, 1.55) | 0.998 | -                        | -            | 0.82 (0.70, 0.97)        | 0.130        | -                        | -            |
| C8-pos                                                 | C48:4 TAG              | HMDB42631* | Glycerolipids - Triacylglycerols                             | -0.806        | 1.1E-18        | 0.85 (0.74, 0.98)                                                                                        | 0.185        | 0.95 (0.62, 1.47) | 0.998 | -                        | -            | 0.83 (0.71, 0.97)        | 0.129        | -                        | -            |
| C8-pos                                                 | C48:5 TAG              | HMDB42841* | Glycerolipids - Triacylglycerols                             | -0.631        | 1.3E-11        | 0.86 (0.75, 0.98)                                                                                        | 0.185        | 0.99 (0.67, 1.48) | 0.998 | -                        | -            | 0.83 (0.71, 0.96)        | 0.125        | -                        | -            |
| C8-pos                                                 | C54:4 TAG              | HMDB05370* | Glycerolipids - Triacylglycerols                             | -0.529        | 9.1E-09        | 0.86 (0.75, 0.99)                                                                                        | 0.197        | 0.60 (0.36, 1.01) | 0.867 | -                        | -            | 0.89 (0.77, 1.03)        | 0.435        | 0.98 (0.81, 1.19)        | 0.851        |
| C8-pos                                                 | C55:3 TAG              | n/a        | Glycerolipids - Triacylglycerols                             | -0.672        | 3.2E-13        | 0.87 (0.76, 1.00)                                                                                        | 0.277        | 1.12 (0.66, 1.91) | 0.972 | -                        | -            | 0.85 (0.74, 0.95)        | 0.206        | -                        | -            |
| C8-pos                                                 | C48:3 TAG              | HMDB05432* | Glycerolipids - Triacylglycerols                             | -0.917        | 1.2E-24        | 0.87 (0.75, 1.01)                                                                                        | 0.320        | 1.03 (0.65, 1.62) | 0.998 | -                        | -            | 0.83 (0.71, 0.98)        | 0.176        | 1.02 (0.82, 1.26)        | 0.884        |
| C8-pos                                                 | C34:2 DAG              | HMDB07103* | Glycerolipids - Diacylglycerols                              | -0.856        | 1.3E-22        | 0.86 (0.73, 1.02)                                                                                        | 0.342        | 0.96 (0.56, 1.65) | 0.998 | -                        | -            | 0.82 (0.69, 0.98)        | 0.202        | 1.07 (0.84, 1.37)        | 0.565        |
| C8-pos                                                 | C52:3 TAG              | HMDB05384* | Glycerolipids - Triacylglycerols                             | -0.810        | 5.3E-18        | 0.87 (0.74, 1.02)                                                                                        | 0.354        | 0.87 (0.52, 1.44) | 0.951 | -                        | -            | 0.85 (0.72, 1.01)        | 0.344        |                          |              |

| Method    | Metabolite                           | HMDB ID    | Category                                                     | Associations between metabolite with large race differences and CHD risk in women from WHI, JHS, and NHS |         |                   |       |                   |       |                          |              |                   |       |                   |       |
|-----------|--------------------------------------|------------|--------------------------------------------------------------|----------------------------------------------------------------------------------------------------------|---------|-------------------|-------|-------------------|-------|--------------------------|--------------|-------------------|-------|-------------------|-------|
|           |                                      |            |                                                              | SD-difference in the WHI-HT                                                                              |         | All women (WHI)   |       | Black women (WHI) |       | Black women (JHS)        |              | White women (WHI) |       | White women (NHS) |       |
|           |                                      |            |                                                              | Beta                                                                                                     | FDR-P   | OR (95% CI)       | FDR   | OR (95% CI)       | FDR   | HR (95% CI)              | raw-P        | OR (95% CI)       | FDR   | HR (95% CI)       | raw-P |
| C8-pos    | C36:2 DAG                            | HMDB07218* | Glycerolipids - Diacylglycerols                              | -0.821                                                                                                   | 6.3E-20 | 0.90 (0.77, 1.05) | 0.501 | 0.88 (0.55, 1.41) | 0.954 | -                        | -            | 0.87 (0.73, 1.04) | 0.455 | 1.02 (0.80, 1.30) | 0.904 |
| HILIC-pos | 3-methylxanthine                     | HMDB01886  | Purines and Pyrimidines                                      | -0.614                                                                                                   | 1.9E-11 | 1.09 (0.96, 1.23) | 0.517 | 1.47 (1.03, 2.10) | 0.867 | -                        | -            | 1.03 (0.90, 1.18) | 0.903 | -                 | -     |
| HILIC-pos | 5-acetylamino-6-amino-3-methyluracil | HMDB04400  | Amino Acids                                                  | -0.546                                                                                                   | 8.7E-10 | 1.09 (0.96, 1.24) | 0.521 | 1.47 (0.96, 2.26) | 0.867 | -                        | -            | 1.04 (0.91, 1.20) | 0.856 | 1.00 (0.82, 1.22) | 0.994 |
| C8-pos    | C16:0 LPE                            | HMDB11503  | Glycerophospholipids - Lysophosphatidylethanolamines         | -0.513                                                                                                   | 3.3E-08 | 1.08 (0.95, 1.23) | 0.555 | 1.61 (1.01, 2.54) | 0.867 | 0.94 (0.76, 1.15)        | 0.539        | 1.04 (0.90, 1.19) | 0.876 | 1.12 (0.94, 1.35) | 0.210 |
| C8-pos    | C52:2 TAG                            | HMDB05369* | Glycerolipids - Triacylglycerols                             | -0.778                                                                                                   | 6.3E-18 | 0.91 (0.78, 1.06) | 0.564 | 0.94 (0.59, 1.47) | 0.991 | -                        | -            | 0.88 (0.74, 1.04) | 0.472 | 1.00 (0.79, 1.27) | 0.984 |
| C8-pos    | 4-cholesten-3-one                    | HMDB00921  | Sterol lipids - Cholesterol and derivatives                  | -0.909                                                                                                   | 2.5E-20 | 1.10 (0.94, 1.29) | 0.595 | 1.09 (0.64, 1.86) | 0.991 | -                        | -            | 1.10 (0.93, 1.30) | 0.648 | -                 | -     |
| C8-pos    | C42:11 PE plasmalogen                | n/a        | Glycerophospholipids - Phosphatidylethanolamine plasmalogens | -0.657                                                                                                   | 2.7E-13 | 1.09 (0.94, 1.26) | 0.595 | 1.21 (0.75, 1.97) | 0.917 | -                        | -            | 1.07 (0.92, 1.25) | 0.717 | -                 | -     |
| C8-pos    | C56:3 TAG                            | HMDB05410* | Glycerolipids - Triacylglycerols                             | -0.670                                                                                                   | 3.2E-13 | 0.92 (0.80, 1.06) | 0.595 | 0.91 (0.58, 1.42) | 0.977 | -                        | -            | 0.91 (0.78, 1.06) | 0.609 | 0.98 (0.78, 1.22) | 0.842 |
| C8-pos    | C18:2 LPE                            | HMDB11507* | Glycerophospholipids - Lysophosphatidylethanolamines         | -0.894                                                                                                   | 8.7E-23 | 1.08 (0.95, 1.23) | 0.603 | 1.26 (0.82, 1.94) | 0.867 | 1.16 (0.93, 1.44)        | 0.178        | 1.06 (0.92, 1.22) | 0.768 | 0.96 (0.80, 1.16) | 0.692 |
| C8-pos    | C34:1 PC                             | HMDB07972* | Glycerophospholipids - Phosphatidylcholines                  | -0.526                                                                                                   | 4.3E-09 | 1.08 (0.94, 1.23) | 0.638 | 1.33 (0.82, 2.17) | 0.867 | -                        | -            | 1.04 (0.90, 1.20) | 0.867 | 0.96 (0.78, 1.19) | 0.706 |
| C8-pos    | C51:2 TAG                            | HMDB49721* | Glycerolipids - Triacylglycerols                             | -0.829                                                                                                   | 3.1E-20 | 0.93 (0.81, 1.06) | 0.638 | 1.17 (0.74, 1.84) | 0.927 | -                        | -            | 0.88 (0.76, 1.02) | 0.421 | -                 | -     |
| C8-pos    | C54:3 TAG                            | HMDB05405* | Glycerolipids - Triacylglycerols                             | -0.695                                                                                                   | 5.2E-14 | 0.92 (0.80, 1.07) | 0.651 | 0.74 (0.46, 1.19) | 0.867 | -                        | -            | 0.94 (0.80, 1.10) | 0.769 | 1.00 (0.81, 1.24) | 0.967 |
| C8-pos    | C14:0 LPC-B                          | HMDB10379* | Glycerophospholipids - Lysophosphatidylcholines              | -0.618                                                                                                   | 1.6E-10 | 0.93 (0.81, 1.07) | 0.654 | 1.31 (0.77, 2.24) | 0.867 | -                        | -            | 0.90 (0.78, 1.04) | 0.516 | 1.01 (0.83, 1.22) | 0.917 |
| HILIC-pos | ADMA                                 | HMDB01539  | Amino Acids                                                  | -0.547                                                                                                   | 1.4E-08 | 0.93 (0.82, 1.06) | 0.657 | 1.00 (0.59, 1.68) | 0.998 | 1.08 (0.89, 1.33)        | 0.438        | 0.93 (0.81, 1.06) | 0.654 | 0.99 (0.81, 1.21) | 0.938 |
| C8-pos    | C14:0 CE                             | HMDB06725  | Sterol lipids - Cholesteryl esters                           | -0.563                                                                                                   | 1.7E-09 | 1.07 (0.94, 1.22) | 0.662 | 1.35 (0.82, 2.23) | 0.867 | -                        | -            | 1.04 (0.91, 1.20) | 0.651 | 1.08 (0.89, 1.30) | 0.426 |
| C8-pos    | C32:2 DAG                            | HMDB07128* | Glycerolipids - Diacylglycerols                              | -0.886                                                                                                   | 5.8E-22 | 0.92 (0.78, 1.08) | 0.662 | 1.13 (0.64, 1.96) | 0.977 | -                        | -            | 0.88 (0.74, 1.05) | 0.508 | -                 | -     |
| HILIC-pos | N-acetylornithine                    | HMDB03357  | Amino Acids                                                  | -0.707                                                                                                   | 1.6E-15 | 0.94 (0.83, 1.06) | 0.681 | 1.01 (0.66, 1.57) | 0.998 | 1.18 (0.97, 1.44)        | 0.103        | 0.93 (0.82, 1.07) | 0.686 | 1.14 (0.95, 1.36) | 0.153 |
| HILIC-pos | 7-methylxanthine                     | HMDB01991  | Purines and Pyrimidines                                      | -0.565                                                                                                   | 9.8E-10 | 1.06 (0.94, 1.20) | 0.693 | 1.44 (1.00, 2.08) | 0.867 | -                        | -            | 1.00 (0.88, 1.15) | 0.989 | -                 | -     |
| C8-pos    | C40:11 PC plasmalogen                | n/a        | Glycerophospholipids - Phosphatidylcholine plasmalogens      | -0.823                                                                                                   | 2.3E-19 | 1.06 (0.94, 1.21) | 0.693 | 1.76 (1.11, 2.79) | 0.867 | -                        | -            | 1.00 (0.87, 1.14) | 0.989 | -                 | -     |
| C8-pos    | C46:2 TAG                            | HMDB10419* | Glycerolipids - Triacylglycerols                             | -0.768                                                                                                   | 2.2E-17 | 0.93 (0.81, 1.08) | 0.693 | 1.14 (0.72, 1.79) | 0.951 | 1.05 (0.85, 1.30)        | 0.631        | 0.89 (0.77, 1.04) | 0.508 | 0.99 (0.80, 1.22) | 0.905 |
| HILIC-pos | N6,N6-dimethyllysine                 | HMDB13287  | Amino Acids                                                  | -0.953                                                                                                   | 6.1E-25 | 1.06 (0.94, 1.20) | 0.693 | 1.31 (0.89, 1.92) | 0.867 | 0.96 (0.79, 1.18)        | 0.720        | 1.04 (0.91, 1.19) | 0.867 | 1.02 (0.85, 1.22) | 0.825 |
| HILIC-pos | C14:0 LPC                            | HMDB10379  | Glycerophospholipids - Lysophosphatidylcholines              | -0.784                                                                                                   | 6.3E-18 | 0.94 (0.83, 1.07) | 0.714 | 1.46 (0.88, 2.42) | 0.867 | 0.85 (0.68, 1.04)        | 0.117        | 0.91 (0.80, 1.04) | 0.528 | 1.01 (0.83, 1.22) | 0.917 |
| C8-pos    | C32:1 DAG                            | HMDB07099* | Glycerolipids - Diacylglycerols                              | -0.864                                                                                                   | 1.0E-22 | 0.93 (0.80, 1.09) | 0.714 | 1.13 (0.68, 1.90) | 0.963 | -                        | -            | 0.89 (0.75, 1.05) | 0.508 | 1.03 (0.82, 1.29) | 0.786 |
| C8-pos    | C34:1 DAG                            | HMDB07102* | Glycerolipids - Diacylglycerols                              | -0.663                                                                                                   | 3.6E-14 | 0.94 (0.80, 1.09) | 0.743 | 0.97 (0.59, 1.62) | 0.998 | 0.86 (0.69, 1.08)        | 0.190        | 0.90 (0.76, 1.07) | 0.609 | 1.04 (0.81, 1.32) | 0.777 |
| C8-pos    | C36:0 PE                             | HMDB08991* | Glycerophospholipids - Phosphatidylethanolamines             | -0.511                                                                                                   | 3.2E-08 | 1.06 (0.92, 1.21) | 0.743 | 1.80 (1.05, 3.09) | 0.867 | -                        | -            | 1.01 (0.87, 1.16) | 0.988 | 0.99 (0.82, 1.19) | 0.901 |
| C8-pos    | C40:6 PS                             | HMDB10167* | Glycerophospholipids - phosphatidylserine                    | -0.949                                                                                                   | 1.5E-25 | 1.06 (0.93, 1.20) | 0.743 | 1.57 (0.96, 2.57) | 0.867 | -                        | -            | 1.01 (0.88, 1.15) | 0.988 | 1.23 (0.81, 1.89) | 0.331 |
| C8-pos    | C47:2 TAG                            | HMDB48435* | Glycerolipids - Triacylglycerols                             | -0.847                                                                                                   | 1.7E-20 | 0.94 (0.82, 1.08) | 0.743 | 1.32 (0.80, 2.17) | 0.867 | -                        | -            | 0.90 (0.77, 1.04) | 0.508 | -                 | -     |
| HILIC-pos | ornithine                            | HMDB00214  | Amino Acids                                                  | -0.624                                                                                                   | 2.2E-11 | 0.95 (0.84, 1.08) | 0.743 | 0.94 (0.60, 1.48) | 0.991 | 1.00 (0.82, 1.23)        | 0.978        | 0.96 (0.84, 1.10) | 0.865 | -                 | -     |
| C8-pos    | C55:2 TAG                            | HMDB50319* | Glycerolipids - Triacylglycerols                             | -0.651                                                                                                   | 4.1E-12 | 0.95 (0.82, 1.09) | 0.770 | 1.24 (0.79, 1.96) | 0.867 | -                        | -            | 0.90 (0.77, 1.05) | 0.547 | -                 | -     |
| C8-pos    | C15:0 LPC                            | HMDB10381  | Glycerophospholipids - Lysophosphatidylcholines              | -0.853                                                                                                   | 2.2E-21 | 0.96 (0.84, 1.09) | 0.790 | 1.34 (0.84, 2.16) | 0.867 | -                        | -            | 0.93 (0.81, 1.06) | 0.642 | -                 | -     |
| C8-pos    | C32:1 PC                             | HMDB07873* | Glycerophospholipids - Phosphatidylcholines                  | -0.916                                                                                                   | 2.2E-27 | 1.04 (0.91, 1.19) | 0.811 | 1.31 (0.83, 2.08) | 0.867 | -                        | -            | 1.00 (0.87, 1.16) | 0.997 | 1.02 (0.82, 1.26) | 0.852 |
| C8-pos    | C44:2 TAG                            | HMDB47770* | Glycerolipids - Triacylglycerols                             | -0.636                                                                                                   | 6.3E-12 | 0.96 (0.83, 1.10) | 0.813 | 1.17 (0.74, 1.86) | 0.927 | 1.08 (0.88, 1.34)        | 0.459        | 0.92 (0.79, 1.07) | 0.648 | -                 | -     |
| C8-pos    | C50:2 TAG                            | HMDB05377* | Glycerolipids - Triacylglycerols                             | -0.844                                                                                                   | 8.5E-23 | 0.95 (0.83, 1.10) | 0.813 | 1.11 (0.69, 1.78) | 0.977 | -                        | -            | 0.91 (0.78, 1.07) | 0.609 | 1.00 (0.80, 1.26) | 0.994 |
| C8-pos    | C48:2 TAG                            | HMDB05376* | Glycerolipids - Triacylglycerols                             | -0.857                                                                                                   | 2.7E-22 | 0.96 (0.83, 1.10) | 0.813 | 1.19 (0.74, 1.92) | 0.927 | -                        | -            | 0.91 (0.78, 1.06) | 0.604 | 1.01 (0.82, 1.25) | 0.905 |
| C8-pos    | C18:3 LPC                            | HMDB10387* | Glycerophospholipids - Lysophosphatidylcholines              | -0.531                                                                                                   | 6.7E-09 | 1.04 (0.92, 1.18) | 0.819 | 1.11 (0.70, 1.77) | 0.963 | 0.82 (0.66, 1.01)        | 0.056        | 1.03 (0.90, 1.18) | 0.883 | 0.87 (0.66, 1.15) | 0.322 |
| C8-pos    | C14:0 LPC-A                          | HMDB10379* | Glycerophospholipids - Lysophosphatidylcholines              | -0.856                                                                                                   | 1.7E-20 | 0.96 (0.84, 1.10) | 0.822 | 1.34 (0.83, 2.16) | 0.867 | -                        | -            | 0.93 (0.81, 1.07) | 0.648 | 1.01 (0.83, 1.22) | 0.917 |
| C8-pos    | C45:2 TAG                            | HMDB43170* | Glycerolipids - Triacylglycerols                             | -0.626                                                                                                   | 4.9E-12 | 0.96 (0.83, 1.10) | 0.824 | 1.32 (0.80, 2.16) | 0.867 | -                        | -            | 0.92 (0.79, 1.07) | 0.642 | 0.95 (0.75, 1.20) | 0.690 |
| C8-pos    | C30:0 DAG                            | HMDB07011* | Glycerolipids - Diacylglycerols                              | -0.591                                                                                                   | 4.8E-11 | 0.96 (0.82, 1.12) | 0.839 | 1.32 (0.69, 2.55) | 0.896 | -                        | -            | 0.93 (0.79, 1.09) | 0.702 | 0.70 (0.37, 1.32) | 0.269 |
| C8-pos    | C56:2 TAG                            | HMDB05404* | Glycerolipids - Triacylglycerols                             | -0.525                                                                                                   | 1.5E-08 | 1.04 (0.90, 1.19) | 0.856 | 1.21 (0.80, 1.84) | 0.869 | -                        | -            | 1.00 (0.86, 1.17) | 0.993 | 0.84 (0.66, 1.07) | 0.156 |
| C8-pos    | C36:2 PC                             | HMDB08039* | Glycerophospholipids - Phosphatidylcholines                  | -0.557                                                                                                   | 4.5E-09 | 1.03 (0.90, 1.18) | 0.881 | 1.05 (0.65, 1.69) | 0.998 | 1.14 (0.91, 1.44)        | 0.255        | 1.03 (0.89, 1.20) | 0.900 | 0.99 (0.82, 1.20) | 0.911 |
| C8-pos    | C36:2 PE                             | HMDB08994* | Glycerophospholipids - Phosphatidylethanolamines             | -0.699                                                                                                   | 8.5E-15 | 0.97 (0.85, 1.11) | 0.881 | 0.97 (0.64, 1.46) | 0.998 | <b>1.40 (1.13, 1.74)</b> | <b>0.002</b> | 0.97 (0.84, 1.11) | 0.883 | 1.12 (0.91, 1.36) | 0.280 |
| C8-pos    | C49:2 TAG                            | HMDB11706* | Glycerolipids - Triacylglycerols                             | -0.986                                                                                                   | 2.8E-27 | 0.97 (0.85, 1.11) | 0.881 | 1.38 (0.84, 2.26) | 0.867 | -                        | -            | 0.92 (0.80, 1.06) | 0.634 | 0.96 (0.79, 1.16) | 0.656 |
| C8-pos    | C54:2 TAG                            | HMDB05403* | Glycerolipids - Triacylglycerols                             | -0.531                                                                                                   | 4.1E-09 | 0.97 (0.83, 1.13) | 0.881 | 1.02 (0.59, 1.43) | 0.988 | -                        | -            | 0.95 (0.80, 1.13) | 0.870 | 0.96 (0.76, 1.22) | 0.746 |
| C8-pos    | C32:0 DAG                            | HMDB07098* | Glycerolipids - Diacylglycerols                              | -0.587                                                                                                   | 7.8E-12 | 0.97 (0.84, 1.12) | 0.882 | 1.20 (0.72, 2.00) | 0.927 | -                        | -            | 0.93 (0.79, 1.08) | 0.706 | 0.97 (0.75, 1.24) | 0.785 |
| C8-pos    | C28:0 PC                             | HMDB07866* | Glycerophospholipids - Phosphatidylcholines                  | -0.598                                                                                                   | 7.4E-10 | 1.03 (0.90, 1.17) | 0.894 | 1.76 (1.04, 2.98) | 0.867 | -                        | -            | 0.97 (0.85, 1.12) | 0.917 | -                 | -     |
| C8-pos    | C30:0 PC                             | HMDB07869* | Glycerophospholipids - Phosphatidylcholines                  | -0.678                                                                                                   | 1.1E-14 | 1.03 (0.90, 1.17) | 0.904 | 1.61 (0.97, 2.68) | 0.867 | 1.10 (0.89, 1.37)        | 0.372        | 0.97 (0.84, 1.12) | 0.906 | 1.01 (0.83, 1.24) | 0.904 |
| C8-pos    | C36:3 PC                             | HMDB08105* | Glycerophospholipids - Phosphatidylcholines                  | -0.821                                                                                                   | 3.4E-20 | 1.02 (0.89, 1.18) | 0.906 | 1.35 (0.80, 2.29) | 0.867 | -                        | -            | 0.99 (0.86, 1.15) | 0.988 | 1.17 (0.96, 1.44) | 0.128 |
| C8-pos    | C46:0 TAG                            | HMDB10411* | Glycerolipids - Triacylglycerols                             | -0.524                                                                                                   | 1.0E-08 | 1.02 (0.89, 1.17) | 0.906 | 1.35 (0.79, 2.32) | 0.867 | -                        | -            | 0.98 (0.85, 1.13) | 0.959 | 0.97 (0.80, 1.18) | 0.760 |
| C8-pos    | C50:1 TAG                            | HMDB44109* | Glycerolipids - Triacylglycerols                             | -0.621                                                                                                   | 5.2E-13 | 0.98 (0.84, 1.13) | 0.906 | 1.10 (0.68, 1.79) | 0.982 | -                        | -            | 0.93 (0.80, 1.09) | 0.733 | -                 | -     |
| C8-pos    | C51:1 TAG                            | HMDB42104* | Glycerolipids - Triacylglycerols                             | -0.598                                                                                                   | 2.4E-11 | 0.98 (0.85, 1.12) | 0.906 | 1.26 (0.79, 2.02) | 0.867 | -                        | -            | 0.93 (0.80, 1.08) | 0.696 | 1.01 (0.81, 1.25) | 0.946 |
| C8-pos    | C36:0 DAG                            | HMDB07216* | Glycerolipids - Diacylglycerols                              | -0.556                                                                                                   | 7.4E-10 | 0.98 (0.84, 1.14) | 0.929 | 1.01 (0.63, 1.63) | 0.998 | -                        | -            | 0.95 (0.81, 1.12) | 0.861 | 1.03 (0.80, 1.33) | 0.828 |
| C8-pos    | C42:0 TAG                            | HMDB42061* | Glycerolipids - Triacylglycerols                             | -0.537                                                                                                   | 4.5E-08 | 0.98 (0.85, 1.13) | 0.929 | 1.38 (0.77, 2.47) | 0.867 | -                        | -            | 0.95 (0.82, 1.10) | 0.812 | -                 | -     |
| C8-pos    | C16:1 LPC                            | HMDB10383  | Glycerophospholipids - Lysophosphatidylcholines              | -0.962                                                                                                   | 4.5E-27 | 1.01 (0.89, 1.15) | 0.938 | 1.15 (0.75, 1.77) | 0.932 | 0.81 (0.66, 1.00)        | 0.052        | 0.99 (0.86, 1.13) | 0.984 | 1.05 (0.87, 1.26) | 0.635 |
| C8-pos    | C44:1 TAG                            | HMDB42301* | Glycerolipids - Triacylglycerols                             | -0.650                                                                                                   | 1.2E-12 | 0.98 (0.86, 1.13) | 0.938 | 1.30 (0.81, 2.10) | 0.867 | 1.04 (0.85, 1.28)        | 0.694        | 0.94 (0.81, 1.09) | 0.769 | 0.86 (0.57, 1.29) | 0.464 |
| C8-pos    | C45:1 TAG                            | HMDB42099* | Glycerolipids - Triacylglycerols                             | -0.630                                                                                                   | 8.2E-12 | 0.98 (0.86, 1.13) | 0.9   |                   |       |                          |              |                   |       |                   |       |

| Method | Metabolite | HMDB ID    | Category                                         | Associations between metabolite with large race differences and CHD risk in women from WHI, JHS, and NHS |         |                   |       |                   |       |                          |              |                   |       |                          |              |
|--------|------------|------------|--------------------------------------------------|----------------------------------------------------------------------------------------------------------|---------|-------------------|-------|-------------------|-------|--------------------------|--------------|-------------------|-------|--------------------------|--------------|
|        |            |            |                                                  | SD-difference in the WHI-HT                                                                              |         | All women (WHI)   |       | Black women (WHI) |       | Black women (JHS)        |              | White women (WHI) |       | White women (NHS)        |              |
|        |            |            |                                                  | Beta                                                                                                     | FDR-P   | OR (95% CI)       | FDR   | OR (95% CI)       | FDR   | HR (95% CI)              | raw-P        | OR (95% CI)       | FDR   | HR (95% CI)              | raw-P        |
| C8-pos | C36:3 PE   | HMDB09060* | Glycerophospholipids - Phosphatidylethanolamines | -0.662                                                                                                   | 1.8E-13 | 0.99 (0.88, 1.13) | 0.972 | 1.00 (0.67, 1.51) | 0.998 | -                        | -            | 0.99 (0.87, 1.14) | 0.988 | 1.16 (0.96, 1.40)        | 0.135        |
| C8-pos | C38:2 PE   | HMDB08942* | Glycerophospholipids - Phosphatidylethanolamines | -0.596                                                                                                   | 3.7E-11 | 1.00 (0.87, 1.14) | 0.977 | 1.41 (0.81, 2.43) | 0.867 | -                        | -            | 0.98 (0.84, 1.13) | 0.921 | 0.92 (0.76, 1.12)        | 0.408        |
| C8-pos | C34:2 PC   | HMDB07973* | Glycerophospholipids - Phosphatidylcholines      | -0.734                                                                                                   | 4.3E-16 | 1.00 (0.86, 1.16) | 0.992 | 1.08 (0.65, 1.82) | 0.991 | -                        | -            | 0.99 (0.85, 1.15) | 0.986 | 0.98 (0.80, 1.19)        | 0.804        |
| C8-pos | C34:2 PE   | HMDB08928* | Glycerophospholipids - Phosphatidylethanolamines | -0.608                                                                                                   | 6.5E-12 | 1.00 (0.88, 1.14) | 0.995 | 1.17 (0.76, 1.81) | 0.927 | <b>1.29 (1.03, 1.60)</b> | <b>0.024</b> | 0.98 (0.85, 1.12) | 0.921 | <b>1.25 (1.03, 1.52)</b> | <b>0.026</b> |
| C8-pos | C49:1 TAG  | HMDB11705* | Glycerolipids - Triacylglycerols                 | -0.747                                                                                                   | 1.1E-15 | 1.00 (0.88, 1.14) | 0.995 | 1.43 (0.88, 2.34) | 0.867 | -                        | -            | 0.95 (0.83, 1.09) | 0.795 | 1.15 (0.88, 1.50)        | 0.312        |

Associations between selected metabolites (>0.5 SD difference in levels between Black and White women in the WHI-HT) and CHD risk in the WHI (combining WHI-OS and placebo arms of WHI-HT; analyses were also stratified by self-reported race), JHS (Black women only), and NHS (White women only). Levels of individual metabolites in each cohort were inverse-normal transformed.

In the WHI, CHD cases were matched to an equal number of healthy controls on baseline age, self-reported race (Black and White), hysterectomy status, and enrollment window, and conditional logistic regression models were used to estimate the associations between metabolites and CHD risk.

In the JHS and NHS, incident CHD cases were documented, and cox proportional-hazards models were used for available metabolites.

Models were adjusted for sub-studies (OS/Estrogen-alone trial/Estrogen-plus-progestin trial; WHI only), batch (JHS only), age (JHS and NHS), body mass index, menopausal status (JHS and NHS), hormone therapy use status, smoking status, diabetes, antihyperglycemic medication use, systolic blood pressure, antihypertensive medication use, aspirin use, lipid-lowering medication use, and plasma levels of total and high-density lipoprotein cholesterol.

**Table S6. Components and their coefficients (estimated using elastic net) in the Racial Difference Metabolomic Pattern (RDMP).**

| Metabolite name and other components | Method    | Category                              | HMDB ID    | Coefficient | Available in MESA | Available in JHS | Available in NHS |
|--------------------------------------|-----------|---------------------------------------|------------|-------------|-------------------|------------------|------------------|
| Intercept                            |           |                                       |            | -2.816      | Yes               | Yes              | Yes              |
| Baseline age                         |           |                                       |            | -0.034      | Yes               | Yes              | Yes              |
| C36:4 DAG-B                          | C8-pos    | Diacylglycerols                       | HMDB07248* | 0.091       |                   |                  | Yes              |
| C38:5 DAG                            | C8-pos    | Diacylglycerols                       | HMDB07199* | 0.037       | Yes               |                  | Yes              |
| C16:1 MAG                            | C8-pos    | Monoacylglycerols                     | HMDB11534* | 0.021       | Yes               |                  |                  |
| C22:1 MAG                            | C8-pos    | Monoacylglycerols                     | HMDB11582* | -0.002      |                   |                  |                  |
| C45:3 TAG                            | C8-pos    | Triacylglycerols                      | n/a        | 0.194       | Yes               |                  |                  |
| C52:0 TAG                            | C8-pos    | Triacylglycerols                      | HMDB05365* | 0.356       | Yes               |                  | Yes              |
| C54:3 TAG                            | C8-pos    | Triacylglycerols                      | HMDB05405* | -0.096      | Yes               |                  | Yes              |
| C54:4 TAG                            | C8-pos    | Triacylglycerols                      | HMDB05370* | -0.328      | Yes               |                  | Yes              |
| C55:3 TAG                            | C8-pos    | Triacylglycerols                      | n/a        | -0.131      | Yes               |                  |                  |
| C58:10 TAG                           | C8-pos    | Triacylglycerols                      | HMDB05476* | 0.059       | Yes               |                  | Yes              |
| C60:12 TAG                           | C8-pos    | Triacylglycerols                      | HMDB05478* | 0.077       | Yes               |                  | Yes              |
| C18:0 LPC                            | HILIC-pos | Lysophosphatidylcholines              | HMDB10384  | 0.175       | Yes               | Yes              | Yes              |
| C22:4 LPC                            | C8-pos    | Lysophosphatidylcholines              | HMDB10401* | 0.323       |                   | Yes              |                  |
| C32:1 PC plasmalogen-A               | C8-pos    | Phosphatidylcholine plasmalogens      | HMDB13404* | -0.249      |                   |                  |                  |
| C34:4 PC plasmalogen                 | C8-pos    | Phosphatidylcholine plasmalogens      | HMDB11212* | -0.423      | Yes               |                  | Yes              |
| C36:2 PC plasmalogen-A               | C8-pos    | Phosphatidylcholine plasmalogens      | HMDB11243* | 0.037       |                   |                  | Yes              |
| C36:2 PC plasmalogen-B               | C8-pos    | Phosphatidylcholine plasmalogens      | HMDB11243* | 0.193       |                   |                  | Yes              |
| C36:3 PC plasmalogen-B               | C8-pos    | Phosphatidylcholine plasmalogens      | HMDB11244* | 0.221       |                   |                  | Yes              |
| C36:4 PC plasmalogen-A               | C8-pos    | Phosphatidylcholine plasmalogens      | HMDB11310* | -0.121      |                   |                  | Yes              |
| C38:4 PC plasmalogen-B               | C8-pos    | Phosphatidylcholine plasmalogens      | HMDB11252* | 0.374       |                   |                  | Yes              |
| C38:6 PC plasmalogen-A               | C8-pos    | Phosphatidylcholine plasmalogens      | HMDB11319* | 0.501       |                   | Yes              |                  |
| C40:11 PC plasmalogen                | C8-pos    | Phosphatidylcholine plasmalogens      | n/a        | -0.212      |                   |                  |                  |
| C40:7 PC plasmalogen                 | C8-pos    | Phosphatidylcholine plasmalogens      | HMDB11294* | 0.029       | Yes               |                  |                  |
| C30:1 PC                             | C8-pos    | Phosphatidylcholines                  | HMDB07870* | -0.049      | Yes               |                  | Yes              |
| C31:1 PC                             | C8-pos    | Phosphatidylcholines                  | HMDB07936* | -0.378      |                   |                  |                  |
| C32:0 PC                             | C8-pos    | Phosphatidylcholines                  | HMDB07871* | -0.076      | Yes               |                  | Yes              |
| C32:2 PC                             | C8-pos    | Phosphatidylcholines                  | HMDB07874* | -0.227      | Yes               | Yes              | Yes              |
| C34:3 PC                             | C8-pos    | Phosphatidylcholines                  | HMDB08006* | -0.243      | Yes               | Yes              | Yes              |
| C34:5 PC                             | C8-pos    | Phosphatidylcholines                  | HMDB07885* | -0.224      |                   |                  |                  |
| C36:4 PC-B                           | C8-pos    | Phosphatidylcholines                  | HMDB08138* | 0.014       | Yes               |                  | Yes              |
| C34:2 PE plasmalogen                 | C8-pos    | Phosphatidylethanolamine plasmalogens | HMDB08952* | -0.046      | Yes               | Yes              | Yes              |
| C36:2 PE plasmalogen                 | C8-pos    | Phosphatidylethanolamine plasmalogens | HMDB09082* | -0.166      | Yes               |                  | Yes              |
| C42:11 PE plasmalogen                | C8-pos    | Phosphatidylethanolamine plasmalogens | n/a        | -0.193      |                   |                  |                  |
| C34:2 PE                             | C8-pos    | Phosphatidylethanolamines             | HMDB08928* | 0.026       | Yes               | Yes              | Yes              |
| C36:0 PE                             | C8-pos    | Phosphatidylethanolamines             | HMDB08991* | -0.073      | Yes               |                  | Yes              |
| C40:6 PS                             | C8-pos    | phosphatidylserine                    | HMDB10167* | -0.041      | Yes               |                  | Yes              |
| 4-cholesten-3-one                    | C8-pos    | Cholesteryl                           | HMDB00921  | -0.512      |                   |                  |                  |
| C16:0 CE                             | C8-pos    | Cholesteryl esters                    | HMDB00885  | 0.425       | Yes               |                  | Yes              |
| C16:1 CE                             | C8-pos    | Cholesteryl esters                    | HMDB00658* | -0.263      | Yes               |                  | Yes              |
| C20:1 CE                             | C8-pos    | Cholesteryl esters                    | HMDB05193  | 0.101       |                   |                  |                  |
| C20:2 CE                             | C8-pos    | Cholesteryl esters                    | HMDB06734  | 0.224       |                   |                  |                  |
| C20:4 CE                             | C8-pos    | Cholesteryl esters                    | HMDB06726  | 0.313       | Yes               |                  | Yes              |
| C20:5 CE                             | C8-pos    | Cholesteryl esters                    | HMDB06731  | -0.306      | Yes               |                  | Yes              |
| C22:4 CE                             | C8-pos    | Cholesteryl esters                    | HMDB06729* | 0.198       | Yes               |                  | Yes              |
| C16:0 Ceramide (d18:1) sphingosine   | C8-pos    | Ceramides                             | HMDB04949  | -0.328      | Yes               | Yes              | Yes              |
| C18:1 SM                             | HILIC-pos | Sphingolipids                         | HMDB00252  | 0.147       | Yes               |                  |                  |
| C22:1 SM                             | C8-pos    | Sphingomyelins                        | HMDB12101  | 0.108       | Yes               | Yes              | Yes              |
| 15-HETE                              | C18-neg   | Fatty acids                           | HMDB03876  | -0.198      |                   |                  |                  |
| 2-hydroxyhexadecanoate               | C18-neg   | Fatty acids                           | HMDB31057  | -0.169      |                   |                  | Yes              |
| 8,11,14-eicosatrienoic acid          | C18-neg   | Fatty acids                           | HMDB02925  | -0.005      |                   |                  | Yes              |
| docosapentaenoic acid                | C18-neg   | Fatty acids                           | HMDB01976  | -0.234      |                   |                  |                  |
| eicosanedioate                       | C18-neg   | Fatty acids                           | n/a        | 0.038       |                   |                  |                  |
| hexadecanedioate                     | C18-neg   | Fatty acids                           | HMDB00672  | -0.525      |                   |                  | Yes              |
| hydroxymyristate                     | C18-neg   | Fatty acids                           | HMDB02261  | -0.297      |                   |                  | Yes              |
| LTB4                                 | C18-neg   | Fatty acids                           | HMDB01085  | 0.167       |                   |                  |                  |
| palmitoleic acid                     | C18-neg   | Fatty acids                           | HMDB03229  | -0.101      |                   |                  | Yes              |
| PGE2                                 | C18-neg   | Fatty acids                           | HMDB01220  | 0.645       |                   |                  |                  |
| stearate                             | C18-neg   | Fatty acids                           | HMDB00827  | 0.364       |                   |                  | Yes              |
| C12 carnitine                        | HILIC-pos | Acylcarnitines                        | HMDB02250  | -0.006      | Yes               | Yes              | Yes              |
| C12:1 carnitine                      | HILIC-pos | Acylcarnitines                        | HMDB13326  | -0.042      | Yes               | Yes              | Yes              |
| C18 carnitine                        | HILIC-pos | Acylcarnitines                        | HMDB00848  | 0.346       | Yes               | Yes              |                  |
| C2 carnitine                         | HILIC-pos | Acylcarnitines                        | HMDB00201  | -0.086      | Yes               | Yes              | Yes              |
| C3 carnitine                         | HILIC-pos | Acylcarnitines                        | HMDB00824  | 0.066       | Yes               | Yes              | Yes              |
| C3-DC-CH3 carnitine                  | HILIC-pos | Acylcarnitines                        | HMDB13133  | 0.356       | Yes               | Yes              |                  |
| C4 carnitine                         | HILIC-pos | Acylcarnitines                        | HMDB02013  | -0.333      | Yes               | Yes              | Yes              |
| C5 carnitine                         | HILIC-pos | Acylcarnitines                        | HMDB00688  | 0.268       | Yes               | Yes              | Yes              |
| C5-DC carnitine                      | HILIC-pos | Acylcarnitines                        | HMDB13130  | -0.060      | Yes               | Yes              | Yes              |
| C7 carnitine                         | HILIC-pos | Acylcarnitines                        | HMDB13238  | 0.037       |                   | Yes              | Yes              |

| Metabolite name and other components     | Method    | Category                       | HMDB ID   | Coefficient | Available in MESA | Available in JHS | Available in NHS |
|------------------------------------------|-----------|--------------------------------|-----------|-------------|-------------------|------------------|------------------|
| 4-hydroxyhippurate                       | HILIC-pos | Amino Acids                    | HMDB13678 | -0.069      |                   |                  | Yes              |
| 5-acetylamino-6-amino-3-methyluracil     | HILIC-pos | Amino Acids                    | HMDB04400 | -0.005      | Yes               |                  | Yes              |
| ADMA                                     | HILIC-pos | Amino Acids                    | HMDB01539 | -0.134      | Yes               | Yes              | Yes              |
| alanine                                  | HILIC-pos | Amino Acids                    | HMDB00161 | -0.296      | Yes               | Yes              | Yes              |
| aminoisobutyric acid                     | HILIC-pos | Amino Acids                    | HMDB03911 | -0.086      |                   |                  |                  |
| asparagine                               | HILIC-pos | Amino Acids                    | HMDB00168 | -0.127      |                   | Yes              | Yes              |
| creatinine                               | HILIC-pos | Amino Acids                    | HMDB00562 | 0.375       | Yes               | Yes              | Yes              |
| cystathionine                            | HILIC-neg | Amino Acids                    | HMDB00099 | 0.021       |                   |                  |                  |
| dimethylglycine                          | HILIC-pos | Amino Acids                    | HMDB00092 | 0.094       | Yes               | Yes              | Yes              |
| glutamine                                | HILIC-pos | Amino Acids                    | HMDB00641 | -0.406      | Yes               | Yes              | Yes              |
| glycine                                  | HILIC-pos | Amino Acids                    | HMDB00123 | -0.045      | Yes               | Yes              | Yes              |
| histidine                                | HILIC-pos | Amino Acids                    | HMDB00177 | -0.406      | Yes               | Yes              | Yes              |
| homoarginine                             | HILIC-pos | Amino Acids                    | HMDB00670 | 0.476       | Yes               | Yes              | Yes              |
| hydroxyproline                           | HILIC-pos | Amino Acids                    | HMDB00725 | 0.047       | Yes               | Yes              | Yes              |
| isoleucine                               | HILIC-pos | Amino Acids                    | HMDB00172 | 0.212       | Yes               | Yes              | Yes              |
| kynurenine                               | HILIC-neg | Amino Acids                    | HMDB00684 | -0.297      | Yes               | Yes              | Yes              |
| lysine                                   | HILIC-pos | Amino Acids                    | HMDB00182 | -0.387      | Yes               | Yes              | Yes              |
| methionine                               | HILIC-pos | Amino Acids                    | HMDB00696 | 0.510       | Yes               | Yes              | Yes              |
| N-acetylaspartic acid                    | HILIC-pos | Amino Acids                    | HMDB00812 | 0.243       | Yes               | Yes              | Yes              |
| N-acetylmethionine                       | HILIC-pos | Amino Acids                    | HMDB03357 | -0.304      | Yes               | Yes              | Yes              |
| N-alpha-acetylmethionine                 | HILIC-pos | Amino Acids                    | HMDB04620 | 0.440       | Yes               | Yes              | Yes              |
| N6-acetyllysine                          | HILIC-pos | Amino Acids                    | HMDB00206 | -0.012      | Yes               | Yes              | Yes              |
| N6,N6-dimethyllysine                     | HILIC-pos | Amino Acids                    | HMDB13287 | -0.701      |                   | Yes              | Yes              |
| ornithine                                | HILIC-pos | Amino Acids                    | HMDB00214 | -0.092      | Yes               | Yes              |                  |
| phenylacetylglutamine                    | HILIC-pos | Amino Acids                    | HMDB06344 | -0.135      | Yes               | Yes              | Yes              |
| phenylalanine                            | HILIC-pos | Amino Acids                    | HMDB00159 | -0.080      | Yes               | Yes              |                  |
| phosphocreatine                          | HILIC-neg | Amino Acids                    | HMDB01511 | -0.019      | Yes               |                  |                  |
| pyroglutamate                            | HILIC-pos | Amino Acids                    | HMDB00267 | -0.186      |                   | Yes              |                  |
| SDMA                                     | HILIC-pos | Amino Acids                    | HMDB03334 | -0.012      | Yes               | Yes              | Yes              |
| threonine                                | HILIC-pos | Amino Acids                    | HMDB00167 | 0.045       | Yes               | Yes              | Yes              |
| trimethylamine-N-oxide                   | HILIC-pos | Amino Acids                    | HMDB00925 | 0.357       | Yes               | Yes              | Yes              |
| valine                                   | HILIC-pos | Amino Acids                    | HMDB00883 | 0.263       | Yes               | Yes              | Yes              |
| bilirubin                                | HILIC-pos | Bile acids and Bilirubins      | HMDB00054 | -0.123      | Yes               | Yes              | Yes              |
| deoxycholate                             | C18-neg   | Bile acids and Bilirubins      | HMDB00626 | 0.031       |                   |                  |                  |
| glycochenodeoxycholate                   | C18-neg   | Bile acids and Bilirubins      | HMDB00637 | -0.050      |                   | Yes              | Yes              |
| glycodeoxycholate/glycochenodeoxycholate | HILIC-pos | Bile acids and Bilirubins      | n/a       | -0.072      | Yes               | Yes              |                  |
| glycoursodeoxycholate                    | C18-neg   | Bile acids and Bilirubins      | HMDB00708 | -0.389      |                   |                  | Yes              |
| taurocholate                             | C18-neg   | Bile acids and Bilirubins      | HMDB00036 | 0.369       |                   | Yes              | Yes              |
| 1-methylguanine                          | HILIC-pos | Purines and Pyrimidines        | HMDB03282 | 0.161       | Yes               | Yes              | Yes              |
| 3-methylxanthine                         | HILIC-pos | Purines and Pyrimidines        | HMDB01886 | -0.309      | Yes               |                  |                  |
| 7-methylguanine                          | HILIC-pos | Purines and Pyrimidines        | HMDB00897 | 0.083       | Yes               | Yes              | Yes              |
| 7-methylxanthine                         | HILIC-pos | Purines and Pyrimidines        | HMDB01991 | -0.487      | Yes               |                  |                  |
| AMP                                      | HILIC-neg | Purines and Pyrimidines        | HMDB00045 | 0.246       |                   |                  |                  |
| cAMP                                     | HILIC-neg | Purines and Pyrimidines        | HMDB00058 | 0.233       | Yes               | Yes              |                  |
| CMP                                      | HILIC-neg | Purines and Pyrimidines        | HMDB00095 | 0.267       |                   |                  |                  |
| cytidine                                 | HILIC-neg | Purines and Pyrimidines        | HMDB00089 | -0.062      |                   |                  |                  |
| cytosine                                 | HILIC-pos | Purines and Pyrimidines        | HMDB00630 | -0.032      |                   |                  | Yes              |
| hypoxanthine                             | HILIC-neg | Purines and Pyrimidines        | HMDB00157 | 0.196       | Yes               | Yes              |                  |
| inosine                                  | HILIC-neg | Purines and Pyrimidines        | HMDB00195 | 0.327       | Yes               | Yes              |                  |
| N2,N2-dimethylguanosine                  | HILIC-pos | Purines and Pyrimidines        | HMDB04824 | 0.033       |                   | Yes              | Yes              |
| UDP-galactose/UDP-glucose                | HILIC-neg | Purines and Pyrimidines        | HMDB00286 | -0.141      | Yes               |                  |                  |
| UDP-glucuronate                          | HILIC-neg | Purines and Pyrimidines        | HMDB00935 | -0.002      |                   |                  |                  |
| uracil                                   | HILIC-neg | Purines and Pyrimidines        | HMDB00300 | -0.073      |                   |                  | Yes              |
| urate                                    | HILIC-neg | Purines and Pyrimidines        | HMDB00289 | 0.468       | Yes               | Yes              | Yes              |
| xanthosine                               | HILIC-pos | Purines and Pyrimidines        | HMDB00299 | 0.204       |                   | Yes              |                  |
| xanthurenate                             | HILIC-neg | Purines and Pyrimidines        | HMDB00881 | 0.082       | Yes               | Yes              | Yes              |
| betaine                                  | HILIC-pos | Quaternary Amines              | HMDB00043 | 0.009       | Yes               | Yes              | Yes              |
| kynurenic acid                           | HILIC-pos | Indoles and Indole derivatives | HMDB00715 | -0.227      | Yes               | Yes              | Yes              |
| tryptamine                               | HILIC-pos | Indoles and Indole derivatives | HMDB00303 | -0.226      |                   |                  |                  |
| N1-methyl-2-pyridone-5-carboxamide       | HILIC-pos | Pyridines and derivatives      | HMDB04193 | 0.007       | Yes               | Yes              | Yes              |
| indoxylsulfate                           | HILIC-neg | Arylsulfates                   | HMDB00682 | -0.215      | Yes               | Yes              | Yes              |
| alpha-ketoglutarate                      | HILIC-neg | Dicarboxylic acids             | HMDB00208 | 0.120       |                   |                  |                  |
| fumarate/maleate                         | HILIC-neg | Dicarboxylic acids             | HMDB00134 | 0.207       | Yes               | Yes              |                  |
| methylmalonate                           | HILIC-neg | Dicarboxylic acids             | HMDB00202 | -0.125      |                   |                  |                  |
| oxalate                                  | HILIC-neg | Dicarboxylic acids             | HMDB02329 | 0.124       | Yes               | Yes              |                  |
| succinate                                | HILIC-neg | Dicarboxylic acids             | HMDB00254 | 0.210       | Yes               | Yes              |                  |
| alpha-hydroxybutyrate                    | HILIC-neg | Hydroxy acids and derivatives  | HMDB00008 | -0.222      | Yes               | Yes              | Yes              |
| lactate                                  | HILIC-neg | Hydroxy acids and derivatives  | HMDB00190 | 0.028       | Yes               | Yes              |                  |
| 6-phosphogluconate                       | HILIC-neg | Carbohydrates and conjugates   | HMDB01316 | -0.154      |                   |                  |                  |
| glucose                                  | HILIC-pos | Carbohydrates and conjugates   | HMDB00122 | 0.539       |                   | Yes              |                  |
| hydroxyphenylacetate                     | HILIC-neg | Aromatic acids                 | HMDB00020 | -0.308      |                   |                  | Yes              |
| trimethylbenzene                         | HILIC-pos | Benzene and derivatives        | HMDB13733 | 0.228       | Yes               | Yes              | Yes              |

| Metabolite name and other components | Method    | Category   | HMDB ID   | Coefficient | Available in MESA | Available in JHS | Available in NHS |
|--------------------------------------|-----------|------------|-----------|-------------|-------------------|------------------|------------------|
| acetaminophen                        | HILIC-pos | Benzenoids | HMDB01859 | -0.147      | Yes               | Yes              | Yes              |
| hippurate                            | HILIC-neg | Benzenoids | HMDB00714 | -0.058      | Yes               | Yes              | Yes              |
| salicylurate                         | HILIC-neg | Benzenoids | HMDB00840 | 0.325       |                   | Yes              | Yes              |
| allantoin                            | HILIC-pos | Others     | HMDB00462 | 0.099       |                   | Yes              | Yes              |
| cortisol                             | HILIC-pos | Others     | HMDB00063 | -0.372      | Yes               | Yes              | Yes              |
| hydroxyectoine                       | HILIC-pos | Others     | n/a       | -0.065      |                   | Yes              |                  |
| L-threo-Sphingosine                  | HILIC-pos | Others     | n/a       | 0.275       |                   |                  |                  |
| piperine                             | HILIC-pos | Others     | HMDB29377 | 0.395       | Yes               | Yes              | Yes              |
| putrescine                           | HILIC-pos | Others     | HMDB01414 | -0.297      |                   |                  | Yes              |
| thiamine                             | HILIC-pos | Others     | HMDB00235 | -0.292      |                   | Yes              | Yes              |
| trigonelline                         | HILIC-pos | Others     | HMDB00875 | -0.053      | Yes               | Yes              | Yes              |



## Supplemental Figures

**Figure S1. Flow chart for the statistical analysis approaches of this study.**

This study aimed to examine differences between Black and White women in metabolomic profiles and investigate whether such differences explain racial differences in CHD risk. **First**, we performed metabolome-wide association analysis to estimate differences in metabolomic profiles between Black and White women in the WHI-OS (discovery); findings were replicated in the WHI-HT (replication) and MESA (validation). **Second**, we constructed the Racial Difference Metabolomic Pattern (RDMP) that represents differences in metabolomic profiles between Black and White women in the WHI-OS (training). We then compared the distribution of the RDMP between Black and White women from the WHI-OS, WHI-HT (internal testing), and MESA (external testing). **Third**, we estimated associations of metabolites with large race differences and the RDMP (quartiles) with the risk of CHD in the WHI (combining WHI-OS and placebo arms of the WHI-HT), adjusting for baseline characteristics and known CHD risk factors. We also performed race-stratified analyses in the WHI and replicated in the JHS (Black women) and NHS (White women).

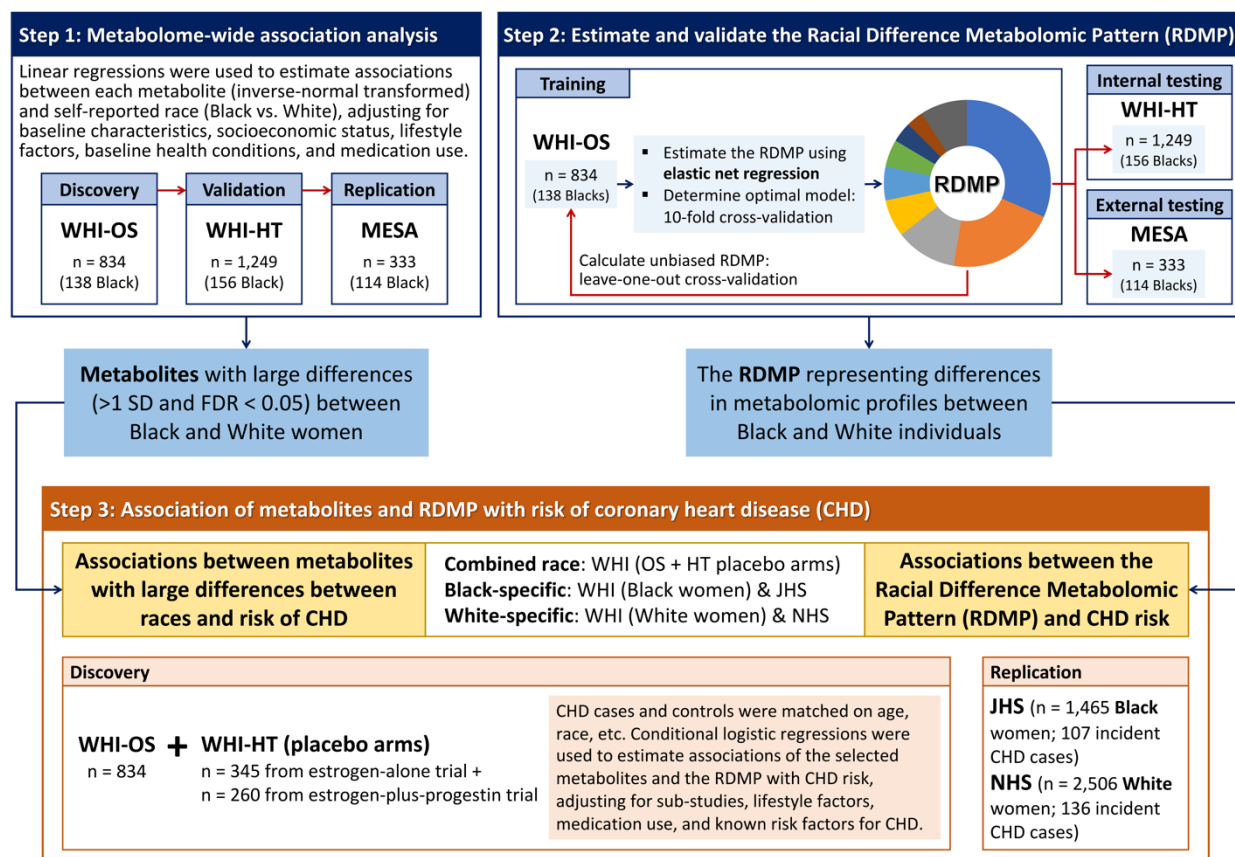

**Figure S2. Distributions of Racial Difference Metabolomic Pattern (RDMP) z-score in each RDMP quartile in the WHI by race.**

The violin plot showed distributions of the RDMP in WHI participants that were used to estimate associations between RDMP and CHD risk (i.e., combined datasets for WHI-OS and placebo arms of the WHI-HT). The table below showed the numbers (percentages) of all women and women of each race group in each RDMP quartile category.

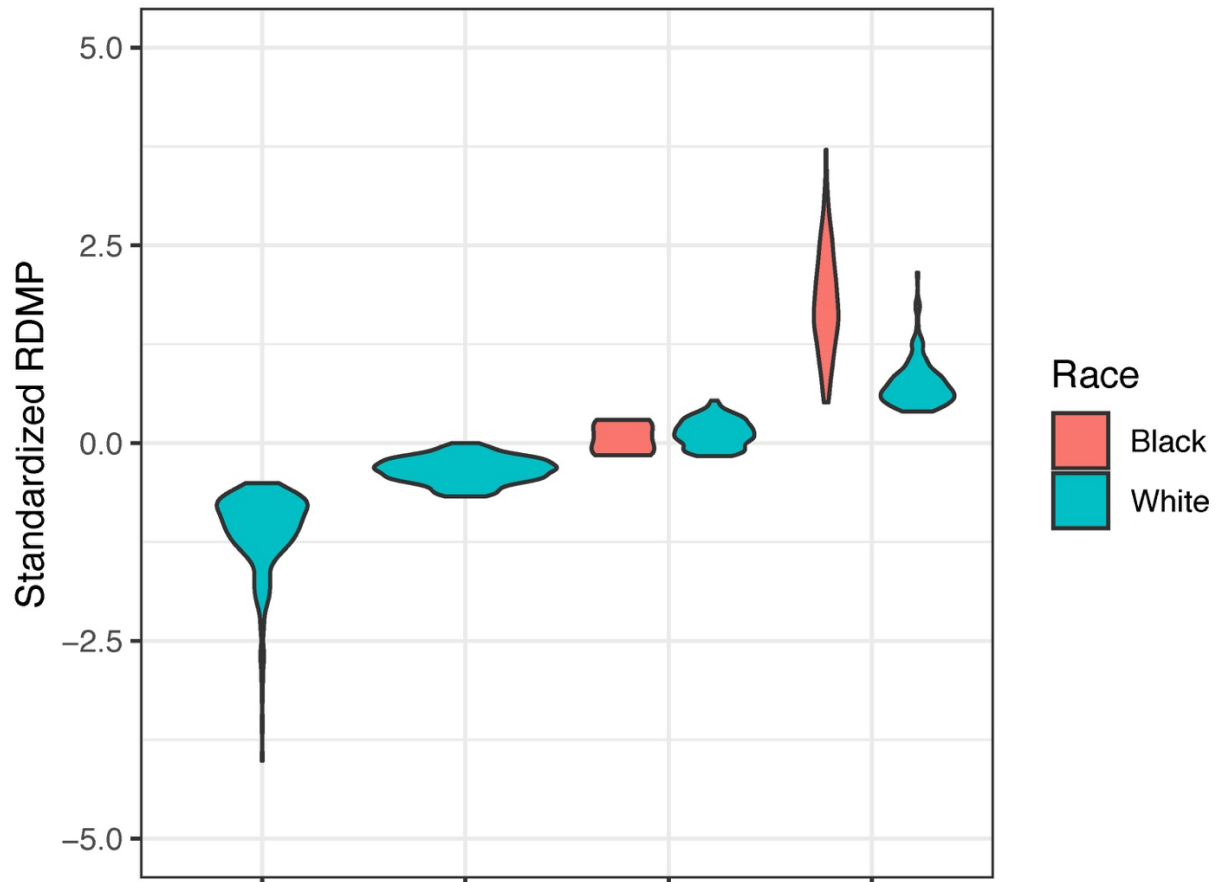

|                | Quartile 1  | Quartile 2  | Quartile 3  | Quartile 4  |
|----------------|-------------|-------------|-------------|-------------|
| <b>Total N</b> | 359 (25.0%) | 359 (25.0%) | 359 (25.0%) | 359 (25.0%) |
| <b>Black</b>   | 0 (0%)      | 1 (0.5%)    | 6 (2.8%)    | 210 (96.8%) |
| <b>White</b>   | 359 (29.5%) | 358 (29.4%) | 353 (29.0%) | 149 (12.2%) |

**Figure S3. Concordance of regression coefficients associated with self-reported race (Black vs White) between WHI-OS, WHI-HT, and MESA.**

Regression coefficients associated with self-reported race (Black vs White) were estimated using linear regression models in the metabolome-wide association analysis, and represented difference in SD units for each metabolite between Black and White participants. Models were adjusted for baseline age, coronary heart disease case-control status (WHI only), hysterectomy status, hormone therapy status (never/past/current users), enrollment window (WHI only), body mass index, smoking status, alcohol consumption, education, family income, physical activity, baseline health conditions (diabetes, hypertension, and depression), and medication use (aspirin, statin or other lipid-lowering, antihyperglycemic, and antihypertensive). Concordance of association coefficients between the discovery set (WHI-OS) and A) WHI-HT and B) women from the MESA were evaluated by Pearson correlation coefficients ( $r$ ).

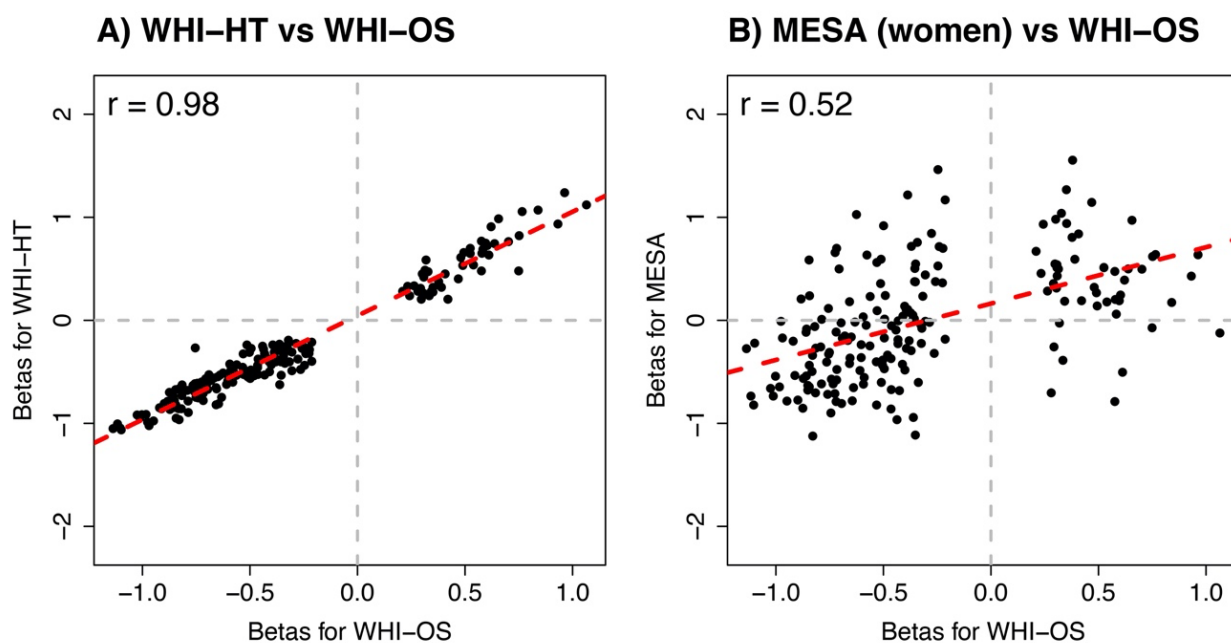

**Figure S4. Associations between metabolites with >1 SD difference by race and with CHD risk in the WHI, stratified by self-reported race.**

Associations were estimated in the combined dataset of WHI-OS and placebo arms of WHI-HT, stratified by self-reported race. CHD cases were matched to controls on age, self-reported race, hysterectomy, and enrollment window. Conditional logistic regression models were adjusted for sub-studies (OS/estrogen-alone trial/estrogen-plus-progestin trial), body mass index, hormone therapy use status, smoking, diabetes, antihyperglycemic medication use, systolic blood pressure, antihypertensive medication use, aspirin use, lipid-lowering medication use, and total and high-density lipoprotein cholesterol.

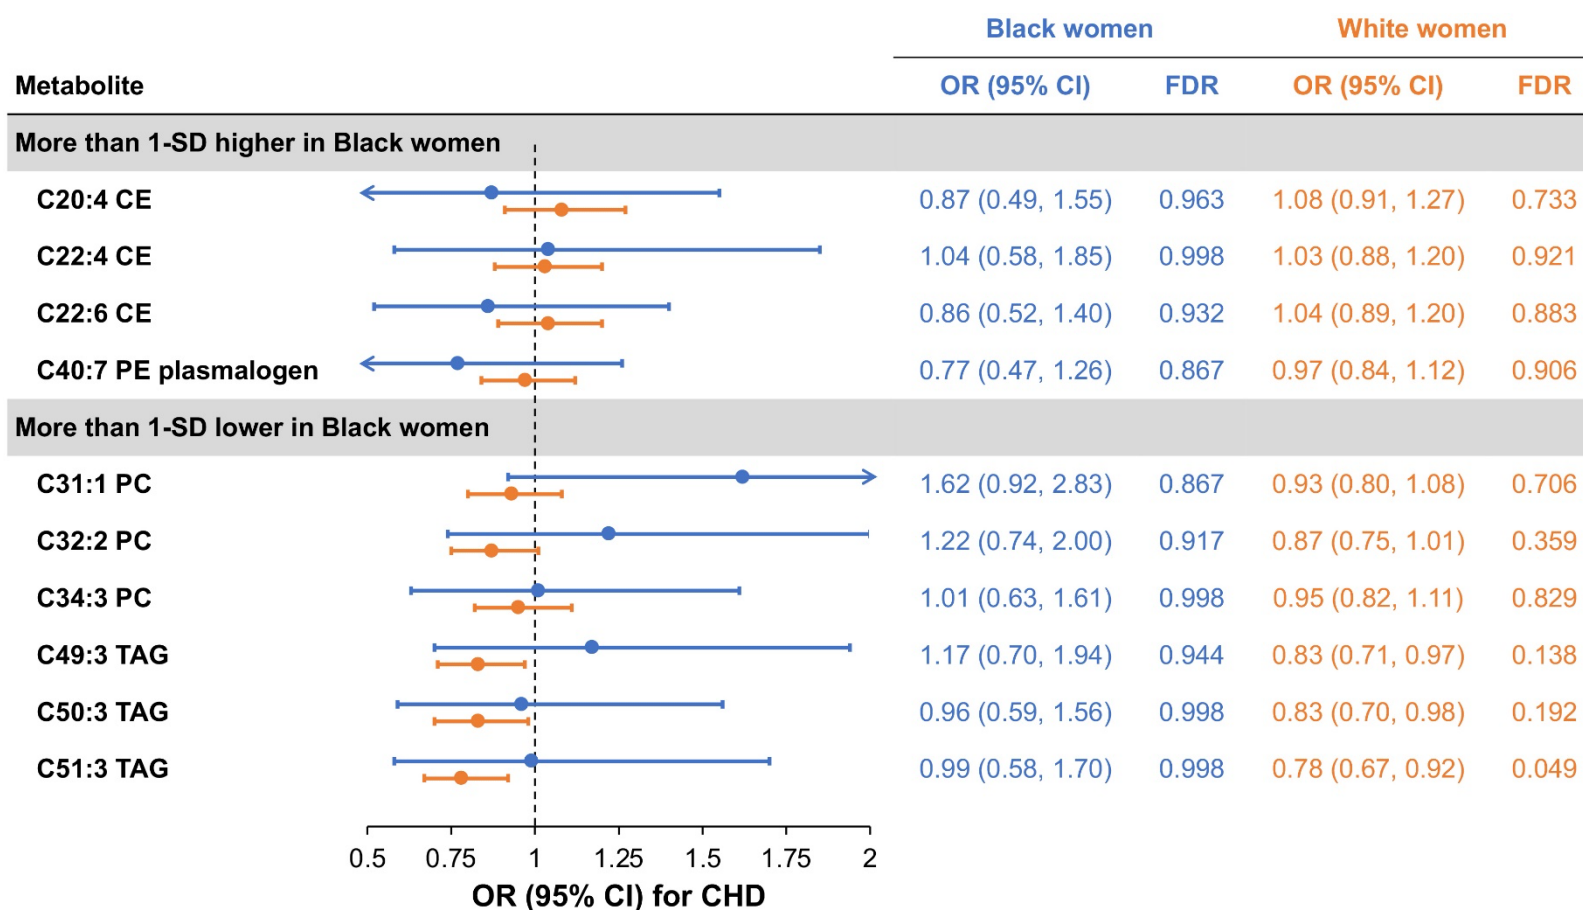

**Figure S5. Receiver operating characteristic (ROC) performance of the Racial Difference Metabolomic Pattern (RDMP) and the restricted RDMP (rRDMP) and self-reported race in WHI and MESA.**

ROC curves were used and the area under the ROC curves (AUC) were calculated. The RDMP were estimated using elastic net regression in the WHI-OS (training set). The RDMP composed of 152 metabolites, but only 93 of these metabolites were available in the MESA (used to calculate rRDMP1), 79 were available in the JHS (used to calculate rRDMP2), and 98 were available in the NHS (used to calculate rRDMP3). To evaluate changes in the ROC performance when reducing the number of metabolites, we calculated RDMP, rRDMP1, rRDMP2, and rRDMP3 in the WHI-HT. The red line is the ROC curve for WHI-OS in which the RDMP was calculated using a leave-one-out cross-validation approach to avoid overfitting. The blue lines are ROCs for RDMP, rRDMP1, rRDMP2, and rRDMP3 in the WHI-HT (internal testing). The orange line is the ROC for rRDMP1 in women from the MESA (external testing).

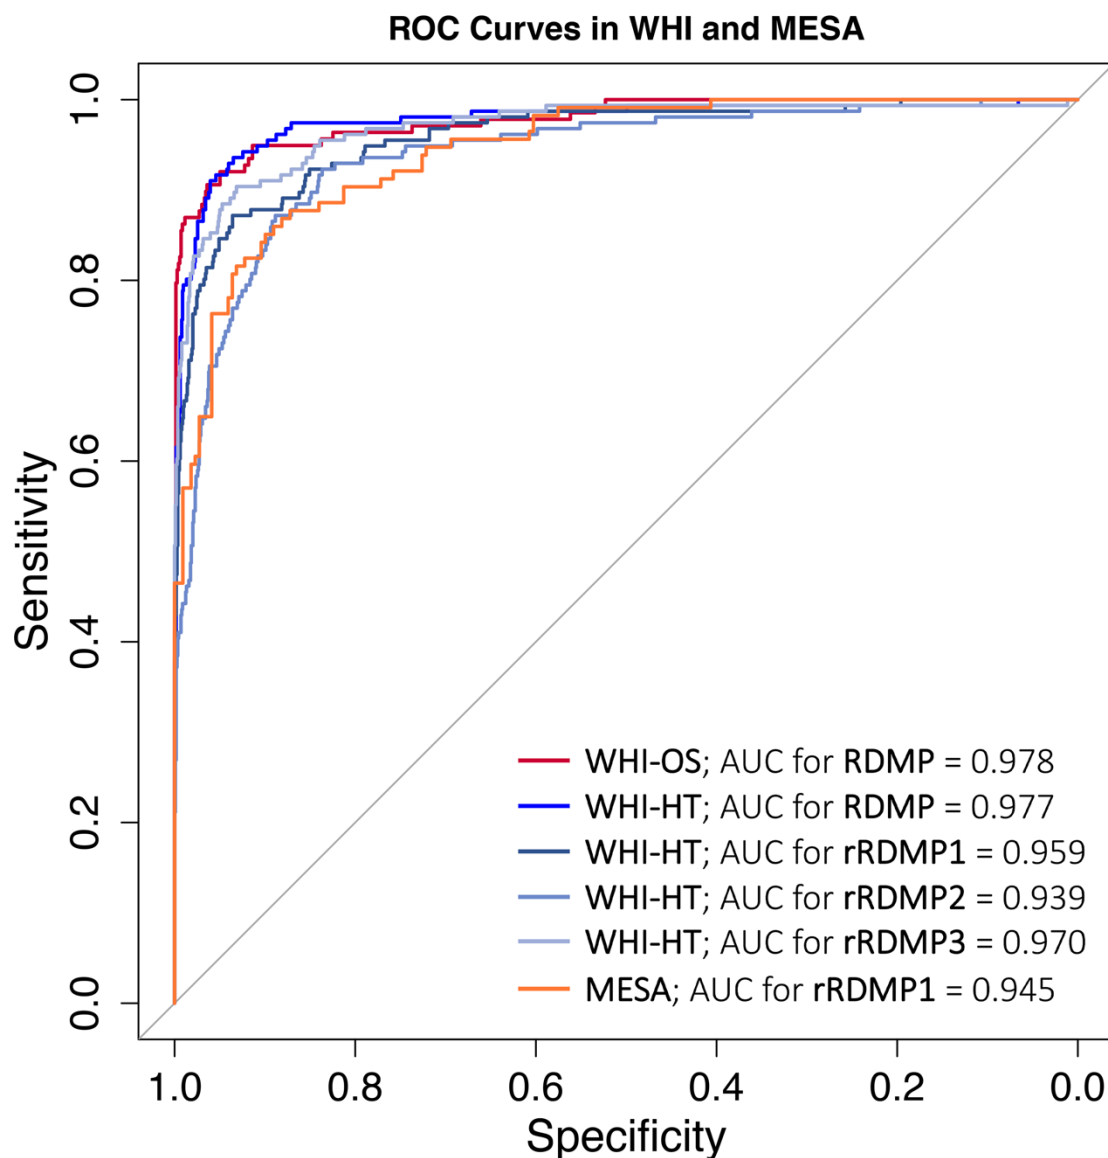

**Figure S6. Distributions of restricted Racial Difference Metabolomic Pattern (rRDMP) that were calculated using the overlapping metabolites with MESA, JHS, or NHS in the WHI-HT.**

The RDMP was calculated based on 152 metabolites in the WHI-OS, only 93 of these metabolites were available in the MESA (used to calculate rRDMP1), 79 were available in the JHS (used to calculate rRDMP2), and 98 were available in the NHS (used to calculate rRDMP3). We then compared the distributions of A) rRDMP1, B) rRDMP2, and C) rRDMP3 between Black and White women from the WHI-HT using violin plots. *P*-values were calculated using Wilcoxon signed-rank test, indicating whether median rRDMPs were different between Black and White women.

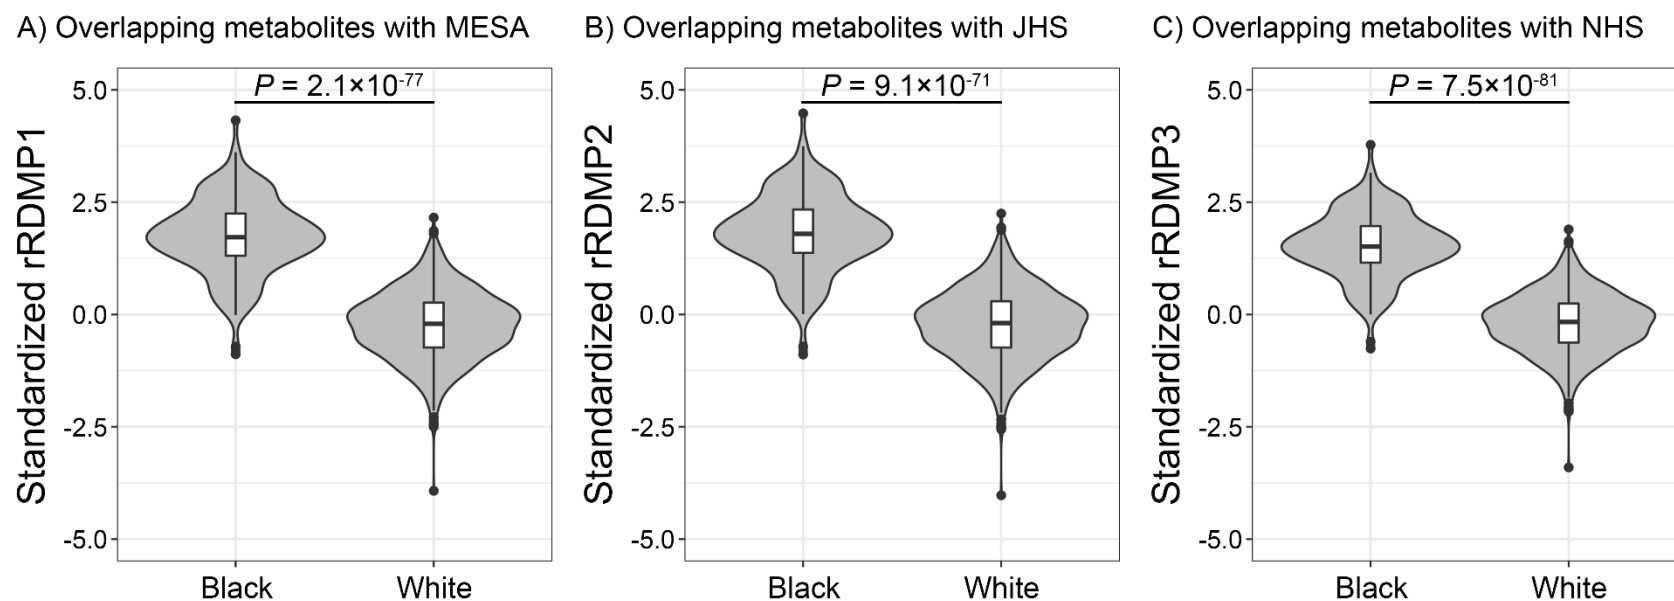

Supplement: res-131-601-s001.pdf [file res-131-601-s001.pdf]
